# Supplementary material for: Heterogeneous Co-catalyzed dehydrogenative aromatization of cyclohex-2-enone and amines to 1,4-phenylenediamine
Source: Royal Society of Chemistry journal article supplement (doi:10.1039/d5gc05871f), 2025-12-30

# Heterogeneous Co-catalyzed dehydrogenative aromatization of cyclohex-2-enone and amines to 1,4- phenylenediamine

Wenjian Li,<sup>a, ‡</sup> Xirui Li,<sup>a, ‡</sup> Rong Huang,<sup>a</sup> Xiangyuan Yao,<sup>a</sup> Guo-Jun Deng<sup>a, b</sup> and Fuhong Xiao,<sup>a, b\*</sup>

---

<sup>a</sup> Key Laboratory for Green Organic Synthesis and Application of Hunan Province, Key Laboratory of Environmentally Friendly Chemistry and Application of Ministry of Education, College of Chemistry, Xiangtan University, Xiangtan 411105, China.

<sup>b</sup> School of Chemistry and Chemical Engineering, Henan Normal University Xinxing, 453007, P. R. China.

\*E-mail: fhxiao@xtu.edu.cn

‡ W. Li and X. Li contributed equally to this work.

## Table of Contents

|                                                  |            |
|--------------------------------------------------|------------|
| <b>1. General information</b>                    | <b>S2</b>  |
| <b>2. Preparation of catalysts</b>               | <b>S2</b>  |
| <b>3. Characterization data for catalysts</b>    | <b>S3</b>  |
| <b>4. Optimization of Reaction Conditions</b>    | <b>S6</b>  |
| <b>5. General procedure</b>                      | <b>S7</b>  |
| <b>6. 2.0 mmol Scale Reactions</b>               | <b>S7</b>  |
| <b>7. Crude NMR spectra and GC-MS</b>            | <b>S8</b>  |
| <b>8. Calculation of green chemistry metrics</b> | <b>S9</b>  |
| <b>9. Characterization data of products</b>      | <b>S11</b> |
| <b>10. Copies of NMR spectra of all products</b> | <b>S20</b> |

## 1. General information

All chemicals were obtained from commercial suppliers and used without further purification unless specified. The commercial silicotungstic acid ( $\text{H}_4\text{SiW}_{12}\text{O}_{40}$ ) was dried at 120 °C for 3 h, which was labeled as  $\text{H}_4\text{SiW}$ . Analytical thin-layer chromatography (TLC) was performed on silica gel GF 254 plates and visualized under UV light (254 nm). All NMR spectra were measured at room temperature using a Bruker 400 (400 MHz for  $^1\text{H}$ , 101 MHz for  $^{13}\text{C}$  and 377 MHz for  $^{19}\text{F}$ ) NMR spectrometer in  $\text{CDCl}_3$  with internal solvent signals (for  $^1\text{H}$  and  $^{13}\text{C}$ ) as reference (7.26 ppm, 77.2 ppm). All the NMR spectra were processed in MestReNova software. High-resolution mass spectra (HRMS) were acquired on a Thermo Fisher Q Exactive mass spectrometer with electrospray ionization (ESI). X-ray diffraction (XRD) patterns were collected on a Philips X'Pert Pro diffractometer with  $\text{Co K}\alpha$  radiation ( $\lambda = 1.79 \text{ \AA}$ ). Fourier-transform infrared (FT-IR) spectra ( $4000\text{--}400 \text{ cm}^{-1}$ ) were recorded on a Thermo Nicolet iS10 spectrometer. X-ray photoelectron spectroscopy (XPS) analyses were conducted using a Thermo Scientific ESCALAB 250 Xi spectrometer with monochromatic  $\text{Al K}\alpha$  radiation.

## 2. Preparation of catalysts

Transition metal-exchanged  $\text{H}_4\text{SiW}$  catalysts were synthesized via a literature-adapted procedure. In a typical synthesis,  $\text{H}_4\text{SiW}$  (5 g, 1.73 mmol) was dissolved in a 1:4 deionized water/ethanol solvent mixture (20 mL) under vigorous stirring at room temperature. An aqueous solution of the cobalt chloride ( $\text{CoCl}_2$ ) was added dropwise to the  $\text{H}_4\text{SiW}$  suspension. The resulting mixture was continuously stirred and heated at 90 °C for 12 h, followed by evaporation of the solvent under reduced pressure. The residue was aged at 25 °C for 12 h to facilitate crystallization. The precipitated solid was dried at 120 °C for 3 h and subsequently calcined in air at varied temperatures (150 °C, 200 °C, 250 °C, 300 °C) for 3 h. The final catalysts were designated as  $\text{CoSiW-T}$  (T: calcination temperature). For comparison, the other catalysts were also prepared based on the above-mentioned process at 300 °C for 3 h, which were designated as  $\text{MSiW-T}$  (M: La, Ag, Fe, Cu, Ni).

### 3. Characterization data for catalysts

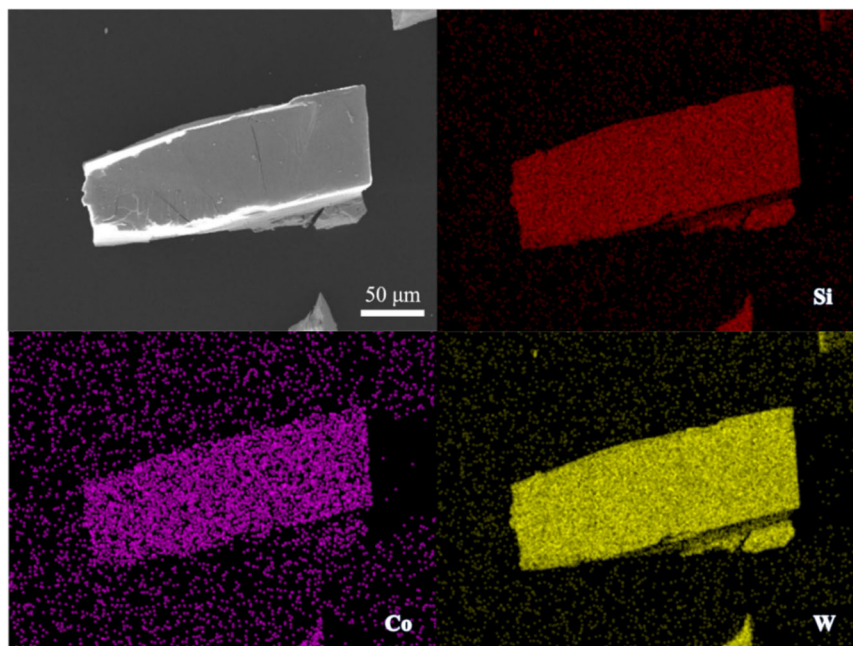

Fig. S1. EDS spectra of CoSiW-300.

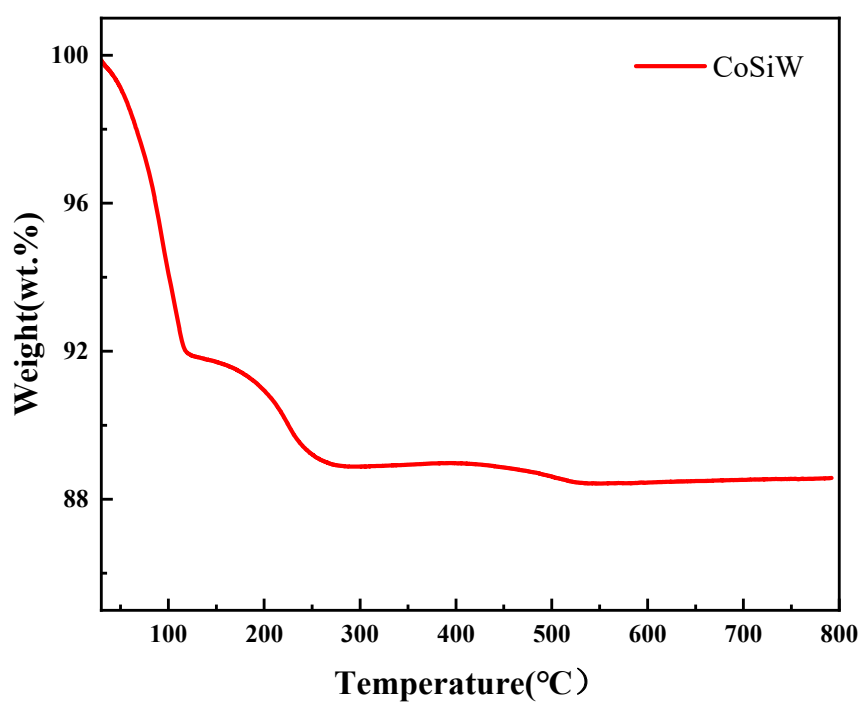

Fig. S2. TGA spectra of CoSiW

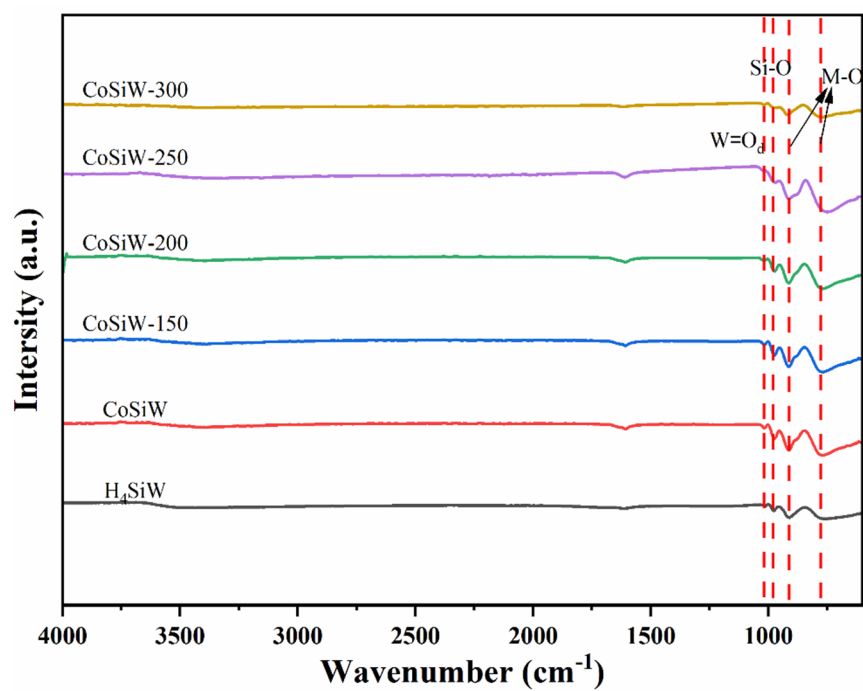

**Fig. S3.** FT-IR spectra of CoSiW-T and H<sub>4</sub>SiW

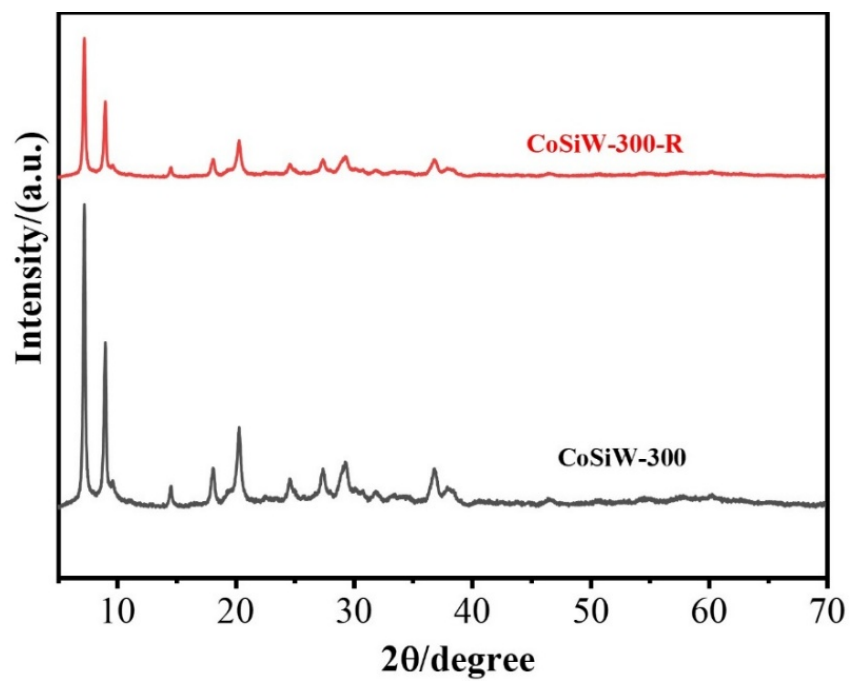

**Fig. S4.** XRD patterns of CoSiW-300 and recovered CoSiW-300

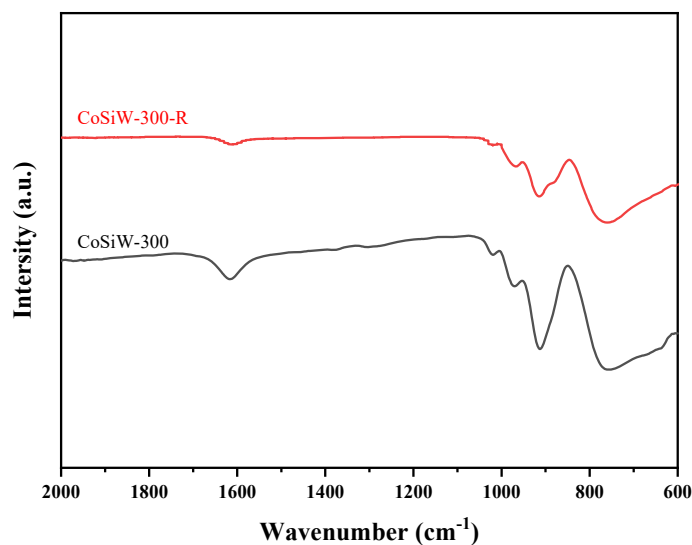

**Fig. S5.** FT-IR spectra of CoSiW-300 and recovered CoSiW-300

#### ICP-OES of CoSiW-300

Co、Si and W content in the optimal into CoSiW-300 were determined using an inductively coupled plasma optical emission spectrometry (ICP-OES, Agilent 5800). The CoSiW-300 sample was dissolved in nitric acid and analyzed at 238.892 nm, 288.158 nm and 207.912 nm, respectively. The good linear relationship between Co、Si and W concentration and intensity ( $R^2 > 0.99$ ) for the calibration curve showed the accuracy as follow,

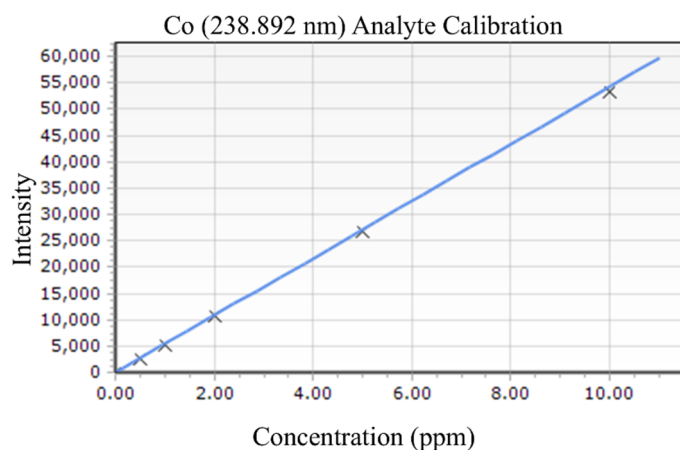

Y=5423.61599679\*X+26.88799968  
 Correlation coefficient: 0.99998  
 %RSE: 1.28864981

**Fig. S6** Calibration curve relative to the presence of Co element detected by ICP-OES

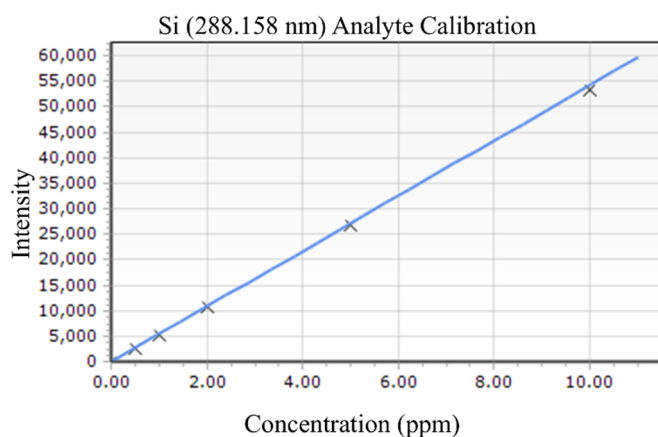

$$Y=899.5402211*X+330.82899180$$

Correlation coefficient: 0.99998

%RSE: 3.11993700

**Fig. S7 Calibration curve relative to the presence of Si element detected by ICP-OES**

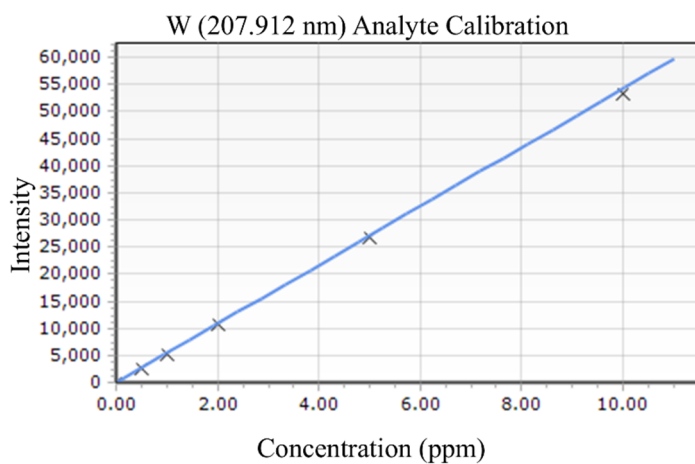

$$Y=1598.62499595*X+15.19253575$$

Correlation coefficient: 0.99997

%RSE: 0.94779156

**Fig. S8 Calibration curve relative to the presence of W element detected by ICP-OES**

**Table S1.** Contents of different elements in CoSiW-300 catalysts

| CoSiW-300 | Elements content (wt%, ICP-OES) |
|-----------|---------------------------------|
| Co        | 3.20%                           |
| Si        | 1.01%                           |
| W         | 73.86%                          |

## 4. Optimization of Reaction Conditions

**Table S2.** Optimization of Oxidant and Solvent <sup>a</sup>

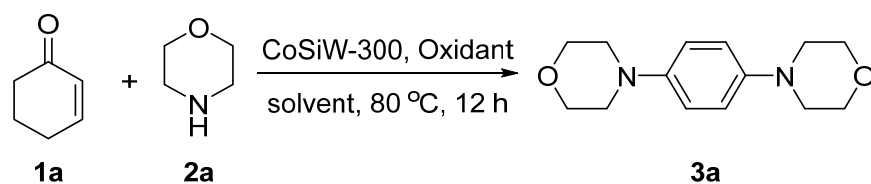

| Entry | Oxidant                                      | Solvent         | Yield <sup>b</sup> (%) |
|-------|----------------------------------------------|-----------------|------------------------|
| 1     | O <sub>2</sub>                               | MeCN            | 52                     |
| 2     | O <sub>2</sub>                               | DMSO            | 60                     |
| 3     | O <sub>2</sub>                               | DMF             | trace                  |
| 4     | O <sub>2</sub>                               | DCE             | trace                  |
| 5     | O <sub>2</sub>                               | toluene         | trace                  |
| 6     | O <sub>2</sub>                               | PhCl            | trace                  |
| 7     | O <sub>2</sub>                               | dioxane         | trace                  |
| 8     | O <sub>2</sub>                               | THF             | trace                  |
| 9     | O <sub>2</sub>                               | MeCN:DMSO (4:1) | 86                     |
| 10    | air                                          | MeCN:DMSO (4:1) | 28                     |
| 11    | N <sub>2</sub>                               | MeCN:DMSO (4:1) | trace                  |
| 12    | H <sub>2</sub> O <sub>2</sub>                | MeCN:DMSO (4:1) | 42                     |
| 13    | TBHP                                         | MeCN:DMSO (4:1) | 50                     |
| 14    | Oxone                                        | MeCN:DMSO (4:1) | trace                  |
| 15    | K <sub>2</sub> S <sub>2</sub> O <sub>8</sub> | MeCN:DMSO (4:1) | 53                     |
| 16    | DTBP                                         | MeCN:DMSO (4:1) | 70                     |

<sup>a</sup> Conditions: **1a** (0.2 mmol), **2a** (0.6 mmol), CoSiW-300 (1 mol%), solvent (0.5 mL), 80 °C, oxidant (2.0 equiv.), 12 h. <sup>b</sup> Isolated yield.

**Table S3.** Optimization of Reaction Time<sup>a</sup>

| Entry | Time (h) | Atmosphere     | Yield <sup>b</sup> (%) |
|-------|----------|----------------|------------------------|
| 1     | 6        | O <sub>2</sub> | 65                     |
| 2     | 12       | O <sub>2</sub> | 82                     |
| 3     | 18       | O <sub>2</sub> | 82                     |
| 7     | 24       | O <sub>2</sub> | 83                     |

<sup>a</sup> Conditions: **1a** (0.2 mmol), **2a** (0.6 mmol), CoSiW-300 (1 mol%), MeCN: DMSO = 4:1 (0.5 mL), 80 °C, O<sub>2</sub>, 12 h. <sup>b</sup> Isolated yield.

## 5. General procedure for the oxidative coupling of C-N bonds of cyclohexenones and amines.

The C–N oxidative cross-coupling reactions were conducted in 10 mL sealed reaction tubes. A representative procedure: cyclohexenone (0.2 mmol), amine (0.6 mmol), a mixed solvent of acetonitrile and dimethyl sulfoxide (0.5 mL), and Co<sub>2</sub>SiW-300 catalyst (10 mg, 4 mol% Co) were charged into the reactor. The system was purged with O<sub>2</sub> (three evacuation-refill cycles) to establish an inert-free oxidative atmosphere. The reaction mixture was heated to the target temperature under vigorous stirring (800 rpm). Reaction progress was monitored by gas chromatography (GC-FID), and product identity was confirmed via GC-MS. Post-reaction, the mixture was diluted with acetonitrile (10 mL), and the catalyst was recovered via centrifugation (12,000 rpm, 5 min) for reuse. The supernatant was concentrated by rotary evaporation, followed by extraction with ethyl acetate (4 × 20 mL) and water (5 mL). The combined organic layers were washed with saturated aqueous NaCl, dried over anhydrous Na<sub>2</sub>SO<sub>4</sub>, filtered, and concentrated under reduced pressure. Pure products (>95% by GC) were isolated and characterized by <sup>1</sup>H/<sup>13</sup>C NMR spectroscopy.

## 6. 2.0 mmol Scale Reactions

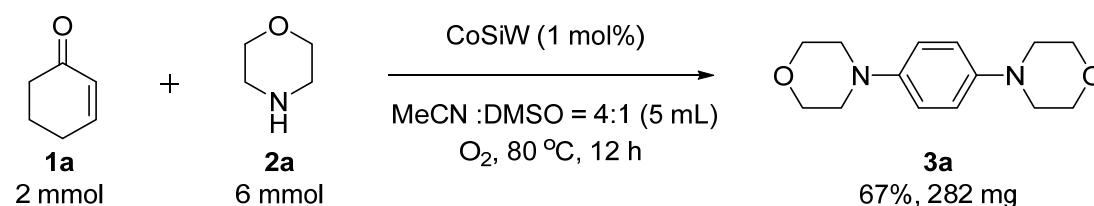

A 100 mL round-bottom flask was charged with **1a** (2 mmol), **2a** (6 mmol), CoSiW-300 (0.2 mmol, 1 mol%), MeCN (4 mL), and DMSO (1 mL). Upon reaction completion,



the mixture was quenched with acetonitrile (10 mL) and extracted with ethyl acetate (3 × 15 mL). The combined organic layers were dried over anhydrous Na<sub>2</sub>SO<sub>4</sub> and concentrated under reduced pressure. Purification by column chromatography on neutral alumina (200–300 mesh, petroleum ether/ethyl acetate = 5:1) afforded the target product as a white solid (282 mg, 67% isolated yield).

## 7. Crude NMR spectra and GC-MS

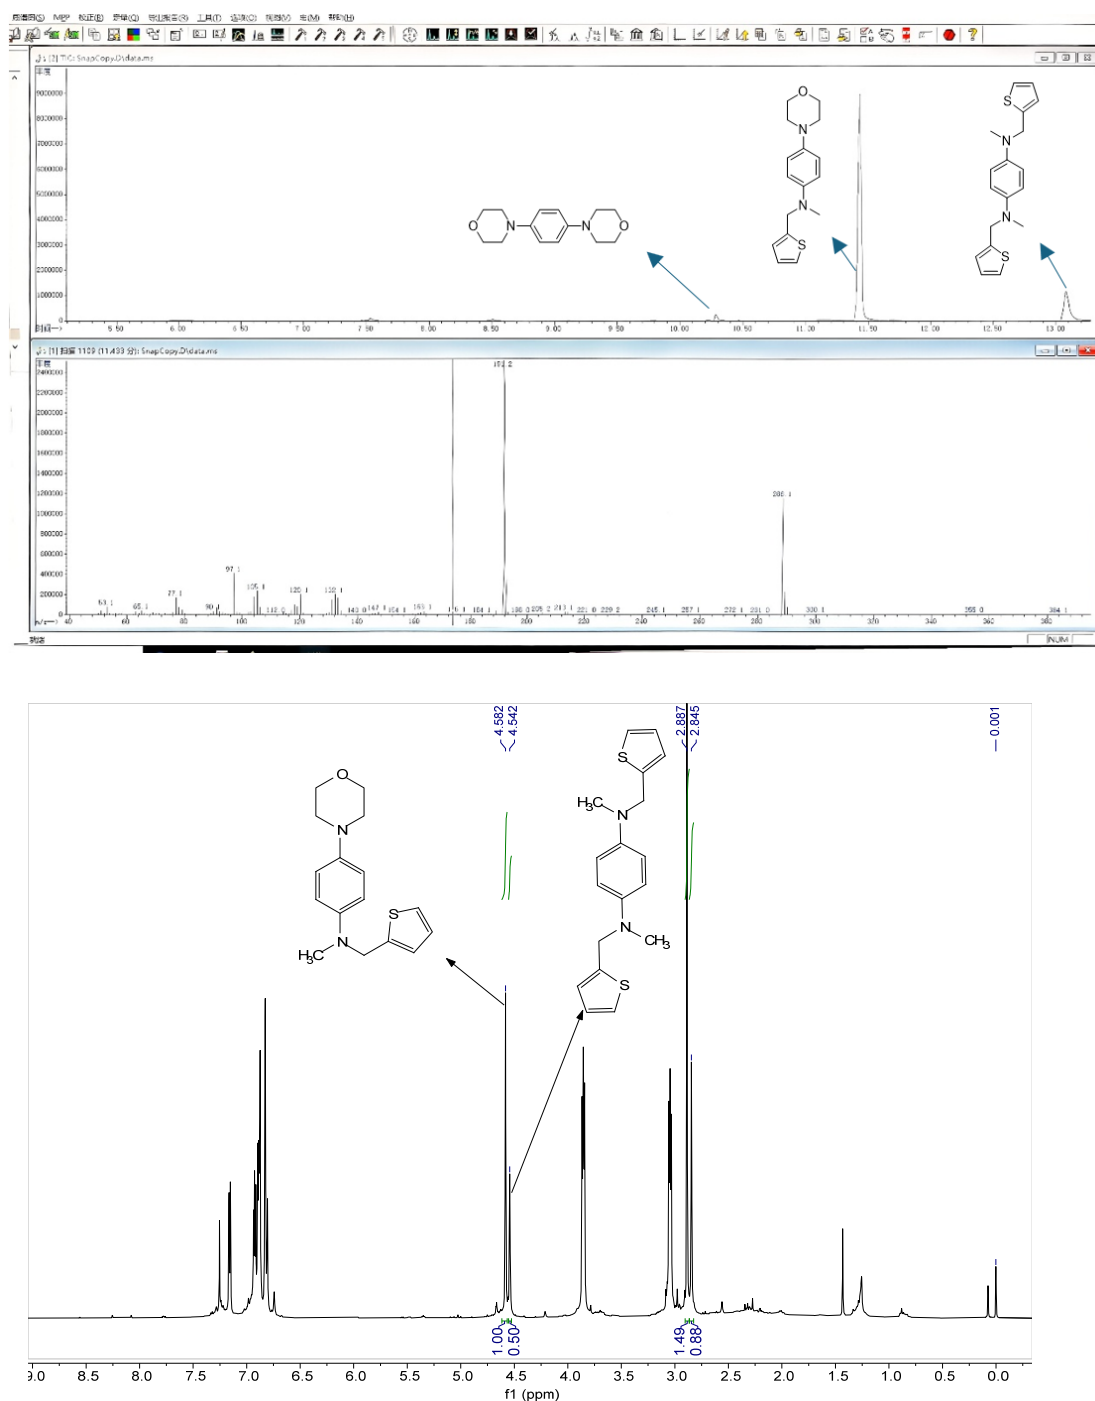

Fig. S9 Crude NMR spectra and GC-MS of 4g

## 8. Calculation of green chemistry metrics

Green chemistry metrics has been calculated for our optimized reaction on the basis of following parameters.

- (1) Atom economy (AE) (%) =  $\frac{\text{molecular mass of desired product}}{\text{Molecular mass of all reactants}} \times 100$
- (2) Reaction mass efficiency (RME) (%) =  $\frac{\text{mass of desired product}}{\text{mass of all reactants}} \times 100$
- (3) Carbon efficiency (CE) (%) =  $\frac{\text{amount of carbon in desired product total}}{\text{producttotal amount of carbon presented in all reactants}} \times 100$
- (4) Atom efficiency(AE<sub>f</sub>) (%) = (% yield of product  $\times$  % atom economy)  $\times 100$
- (5) Environmental factor (E-factor) =  $\frac{\text{Amount of waste}}{\text{Amount of product}}$
- (6) Optimumefficiency(OE) =  $\frac{\text{RME}}{\text{AE}} \times 100$
- (7) Productmassintensity(PMI) =  $\frac{\text{mass of all reactants + solvent}}{\text{mass of product}}$

(a) *Green Chem.*, 2024, **26**, 4684.

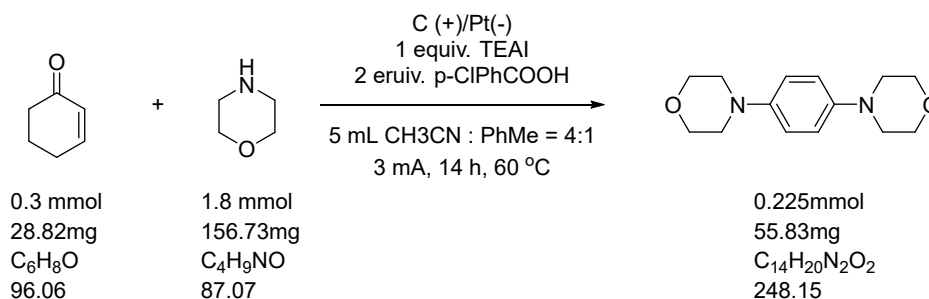

|                                 |                         |          |                     |
|---------------------------------|-------------------------|----------|---------------------|
| Reactant <b>1a</b>              | cyclohex-2-en-1-one     | 28.82 mg | 0.3 mmol FW 96.06   |
| Reactant <b>2a</b>              | morpholine              | 156.73mg | 1.8 mmol FW 87.07   |
| Solvent                         | CH <sub>3</sub> CN      | 3144mg   | 76.6mmol FW 41.05   |
|                                 | PhMe                    | 867mg    | 9.4mmol FW 92.14    |
| Product <b>3a</b>               | 1,4-dimorpholinobenzene | 55.83mg  | 0.225mmol FW 248.15 |
| Yield of product <b>3a</b> =75% |                         |          |                     |

- (1)  $AE = \frac{248.15}{96.06+87.07 \times 2} \times 100\% = 91.83\%$
- (2)  $RME = \frac{55.83}{28.82+156.73} \times 100\% = 30.08\%$
- (3)  $CE = \frac{0.75 \times 14}{6+4 \times 2} \times 100\% = 75\%$
- (4)  $AE_f = (0.75 \times 0.9183) \times 100\% = 68.87\%$
- (5)  $E\text{-factor} = \frac{(28.82+156.73+3144+867+77+94)-55.83}{55.83} = 77.2$
- (6)  $OE = \frac{30.08}{91.83} \times 100\% = 32.75\%$
- (7)  $PMI = \frac{28.82+156.73+3144+867}{55.83} = 75.16$

**(b) Our approach:**

|                                                                                   |                         |                                                                                   |                                                                           |                                                                                    |
|-----------------------------------------------------------------------------------|-------------------------|-----------------------------------------------------------------------------------|---------------------------------------------------------------------------|------------------------------------------------------------------------------------|
| 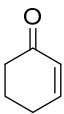 | +                       |  | $\xrightarrow[\text{MeCN:DMSO(0.5 mL, 4:1)}]{\text{CoSiW-300 (1 mol\%)}}$ |  |
| 0.2 mmol<br>19.21mg<br>$\text{C}_6\text{H}_8\text{O}$<br>96.06                    |                         | 0.6 mmol<br>52.24mg<br>$\text{C}_4\text{H}_9\text{NO}$<br>87.07                   |                                                                           | 82% yield<br>40.70mg<br>$\text{C}_{14}\text{H}_{20}\text{N}_2\text{O}_2$<br>248.15 |
| Reactant <b>1a</b>                                                                | cyclohex-2-en-1-one     | 19.21 mg                                                                          | 0.2 mmol FW 96.06                                                         |                                                                                    |
| Reactant <b>2a</b>                                                                | morpholine              | 52.24mg                                                                           | 0.6 mmol FW 87.07                                                         |                                                                                    |
| Solvent                                                                           | MeCN                    | 314mg                                                                             | 76.6mmol FW 41.05                                                         |                                                                                    |
|                                                                                   | DMSO                    | 110mg                                                                             | 1.4mmol FW 78.13                                                          |                                                                                    |
| Product <b>3a</b>                                                                 | 1,4-dimorpholinobenzene | 40.70mg                                                                           | 0.164mmol FW 248.15                                                       |                                                                                    |
| Yield of product <b>3a</b> = 82%                                                  |                         |                                                                                   |                                                                           |                                                                                    |

$$(1) \text{ AE} = \frac{248.15}{96.06+87.07 \times 2} \times 100\% = 91.83\%$$

$$(2) \text{ RME} = \frac{40.70}{19.21+52.24} \times 100\% = 56.96\%$$

$$(3) \text{ CE} = \frac{0.82 \times 14}{6+4 \times 2} \times 100\% = 82\%$$

$$(4) \text{ AE}_f = (0.82 \times 0.9183) \times 100\% = 75.30\%$$

$$(5) \text{ E-factor} = \frac{(19.21+52.24+314+110+6)-40.70}{40.70} = 11.3$$

$$(6) \text{ OE} = \frac{56.96}{91.83} \times 100\% = 62.02\%$$

$$(7) \text{ PMI} = \frac{19.21+52.24+314+110}{40.70} = 12.17$$

| No.                          | E-Factor | PMI  | AE (%) | RME (%) | CE (%) | AE <sub>f</sub> (%) | OE (%) |
|------------------------------|----------|------|--------|---------|--------|---------------------|--------|
| Ideal value                  | 0        | 1    | 100    | 100     | 100    | 100                 | 100    |
| Reported method <sup>8</sup> | 77.2     | 75.2 | 91.8   | 30.1    | 75.0   | 68.9                | 32.7   |
| This work                    | 11.3     | 12.2 | 91.8   | 57.0    | 82     | 75.4                | 62.0   |

## 8. Characterization data of products

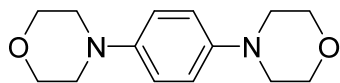

**1,4-dimorpholinobenzene (3a):** pale yellow solid was obtained with 82% isolated yield.  $^1\text{H}$  NMR (400 MHz,  $\text{CDCl}_3$ )  $\delta$  6.90 (s, 4H), 3.88 – 3.84 (m, 8H), 3.11 – 3.05 (m, 8H).  $^{13}\text{C}$  NMR (100 MHz,  $\text{CDCl}_3$ )  $\delta$  145.4, 117.3, 66.9, 50.4.

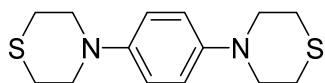

**1,4-dithiomorpholinobenzene (3b):** white solid was obtained with 67% isolated yield.  $^1\text{H}$  NMR (400 MHz,  $\text{CDCl}_3$ )  $\delta$  6.87 (s, 4H), 3.42 – 3.36 (m, 8H), 2.80 – 2.74 (m, 8H).  $^{13}\text{C}$  NMR (101 MHz,  $\text{CDCl}_3$ )  $\delta$  146.2, 119.1, 53.2, 27.4.

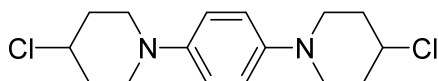

**1,4-bis(4-chloropiperidin-1-yl)benzene (3c):** brown solid was obtained with 52% isolated yield.  $^1\text{H}$  NMR (400 MHz,  $\text{CDCl}_3$ )  $\delta$  6.89 (s, 4H), 4.22 – 4.13 (m, 2H), 3.45 – 3.35 (m, 4H), 3.00 – 2.89 (m, 4H), 2.26 – 2.16 (m, 4H), 2.08 – 1.96 (m, 4H).  $^{13}\text{C}$  NMR (101 MHz,  $\text{CDCl}_3$ )  $\delta$  145.3, 118.2, 57.1, 48.6, 35.3.

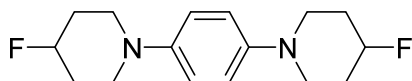

**1,4-bis(4-fluoropiperidin-1-yl)benzene (3d):** colourless solid was obtained with 66% isolated yield.  $^1\text{H}$  NMR (400 MHz,  $\text{CDCl}_3$ )  $\delta$  6.91 (s, 4H), 4.88 – 4.81 (m, 1H), 4.76 – 4.68 (m, 1H), 3.31 – 3.21 (m, 4H), 3.10 – 3.00 (m, 4H), 2.11 – 1.94 (m, 8H).  $^{13}\text{C}$  NMR (101 MHz,  $\text{CDCl}_3$ )  $\delta$  145.3, 118.3, 89.2, 87.5, 47.2, 47.1, 31.4, 31.3.  $^{19}\text{F}$  NMR (376 MHz,  $\text{CDCl}_3$ )  $\delta$  -180.94.

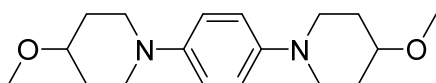

**1,4-bis(4-methoxypiperidin-1-yl)benzene (3e):** Pale yellow solid was obtained with 40% isolated yield.  $^1\text{H}$  NMR (400 MHz,  $\text{CDCl}_3$ )  $\delta$  6.90 (s, 4H), 3.44 – 3.29 (m, 12H),

2.85 – 2.77 (m, 4H), 2.07 – 1.98 (m, 4H), 1.75 – 1.69 (m, 4H).  $^{13}\text{C}$  NMR (101 MHz,  $\text{CDCl}_3$ )  $\delta$  145.4, 118.2, 76.2, 55.5, 48.6, 30.9.

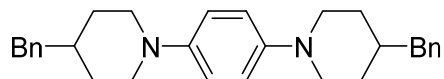

**1,4-bis(4-benzylpiperidin-1-yl)benzene (3f):** white solid was obtained with 42% isolated yield.  $^1\text{H}$  NMR (400 MHz,  $\text{CDCl}_3$ )  $\delta$  7.29 (t,  $J = 7.4$  Hz, 4H), 7.23 – 7.14 (m, 6H), 6.88 (s, 4H), 3.55 – 3.45 (m, 4H), 2.63 – 2.51 (m, 8H), 1.78 – 1.71 (m, 4H), 1.68 – 1.63 (m, 2H), 1.48 – 1.38 (m, 4H).  $^{13}\text{C}$  NMR (101 MHz,  $\text{CDCl}_3$ )  $\delta$  145.8, 140.6, 129.1, 128.2, 125.8, 118.2, 51.3, 43.2, 37.7, 32.2.

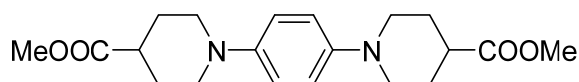

**dimethyl 1,1'-(1,4-phenylene)bis(piperidine-4-carboxylate) (3g):** pink solid was obtained with 56% isolated yield.  $^1\text{H}$  NMR (400 MHz,  $\text{CDCl}_3$ )  $\delta$  6.89 (s, 4H), 3.70 (s, 6H), 3.54 – 3.47 (m, 4H), 2.69 (td,  $J = 11.8, 2.7$  Hz, 4H), 2.45 – 2.36 (m, 2H), 2.06 – 1.98 (m, 4H), 1.94 – 1.83 (m, 4H).  $^{13}\text{C}$  NMR (101 MHz,  $\text{CDCl}_3$ )  $\delta$  175.4, 145.7, 118.2, 51.7, 50.4, 40.8, 28.3.

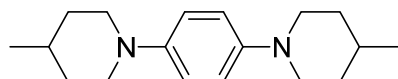

**1,4-bis(4-methylpiperidin-1-yl)benzene (3h):** brown solid was obtained with 40% isolated yield.  $^1\text{H}$  NMR (400 MHz,  $\text{CDCl}_3$ )  $\delta$  6.90 (s, 4H), 3.49 (d,  $J = 11.7$  Hz, 4H), 2.60 (t,  $J = 11.4$  Hz, 4H), 1.73 (d,  $J = 12.6$  Hz, 4H), 1.48 – 1.33 (m, 6H), 0.97 (d,  $J = 6.2$  Hz, 6H).  $^{13}\text{C}$  NMR (101 MHz,  $\text{CDCl}_3$ )  $\delta$  145.9, 118.1, 51.3, 34.4, 30.6, 21.9.

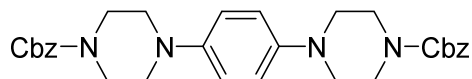

**dibenzyl 4,4'-(1,4-phenylene)bis(piperazine-1-carboxylate) (3i):** Off-white solid was obtained with 61% isolated yield.  $^1\text{H}$  NMR (400 MHz,  $\text{CDCl}_3$ )  $\delta$  7.39 – 7.30 (m, 10H), 6.89 (s, 4H), 5.16 (s, 4H), 3.66 (t,  $J = 5.1$  Hz, 8H), 3.04 (s, 8H).  $^{13}\text{C}$  NMR (101 MHz,  $\text{CDCl}_3$ )  $\delta$  155.2, 136.6, 128.5, 128.1, 127.9, 118.3, 67.2, 50.4, 43.8.

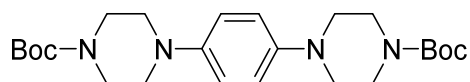

**di-tert-butyl 4,4'-(1,4-phenylene)bis(piperazine-1-carboxylate) (3j):** Brownish-gray solid was obtained with 45% isolated yield.  $^1\text{H}$  NMR (400 MHz,  $\text{CDCl}_3$ )  $\delta$  6.90 (s, 4H), 3.57 (t,  $J$  = 5.0 Hz, 8H), 3.03 (t,  $J$  = 5.1 Hz, 8H), 1.48 (s, 18H).  $^{13}\text{C}$  NMR (101 MHz,  $\text{CDCl}_3$ )  $\delta$  154.7, 145.6, 118.2, 79.8, 50.4, 28.4.

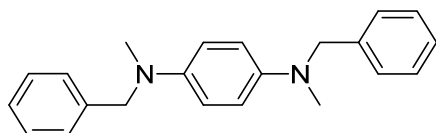

**$N^1,N^4$ -dibenzyl- $N^1,N^4$ -dimethylbenzene-1,4-diamine (3k):** green solid was obtained with 56% isolated yield.  $^1\text{H}$  NMR (400 MHz,  $\text{CDCl}_3$ )  $\delta$  7.33 – 7.22 (m, 10H), 6.76 (s, 4H), 4.37 (s, 4H), 2.86 (s, 6H).  $^{13}\text{C}$  NMR (101 MHz,  $\text{CDCl}_3$ )  $\delta$  142.8, 139.4, 128.4, 127.3, 126.8, 115.2, 58.4, 39.1.

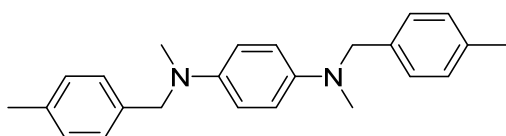

**$N^1,N^4$ -dimethyl- $N^1,N^4$ -bis(4-methylbenzyl)benzene-1,4-diamine (3l):** Pale green solid was obtained with 65% isolated yield.  $^1\text{H}$  NMR (400 MHz,  $\text{CDCl}_3$ )  $\delta$  7.16 – 7.09 (m, 8H), 6.76 (s, 4H), 4.33 (s, 4H), 2.84 (s, 6H), 2.32 (s, 6H).  $^{13}\text{C}$  NMR (101 MHz,  $\text{CDCl}_3$ )  $\delta$  142.9, 136.3, 129.0, 127.3, 115.1, 58.0, 38.9, 21.1.

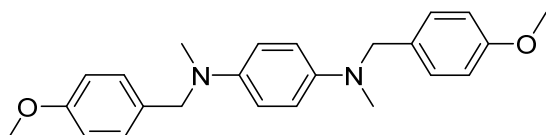

**$N^1,N^4$ -bis(4-methoxybenzyl)- $N^1,N^4$ -dimethylbenzene-1,4-diamine (3m):** Dark green solid was obtained with 63% isolated yield.  $^1\text{H}$  NMR (400 MHz,  $\text{CDCl}_3$ )  $\delta$  7.18 (d,  $J$  = 8.6 Hz, 4H), 6.84 (d,  $J$  = 8.6 Hz, 4H), 6.77 (s, 4H), 4.30 (s, 4H), 3.79 (s, 6H), 2.82 (s, 6H).  $^{13}\text{C}$  NMR (101 MHz,  $\text{CDCl}_3$ )  $\delta$  158.5, 143.0, 131.3, 128.5, 115.4, 113.7, 57.8, 55.2, 38.8.

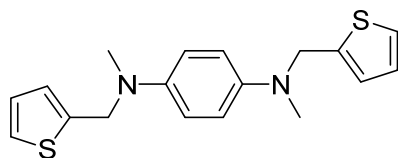

***N*<sup>1</sup>,*N*<sup>4</sup>-dimethyl-*N*<sup>1</sup>,*N*<sup>4</sup>-bis(thiophen-2-ylmethyl)benzene-1,4-diamine (3n):** black solid was obtained with 59% isolated yield. <sup>1</sup>H NMR (400 MHz, CDCl<sub>3</sub>) δ 7.16 (dd, *J* = 5.0, 1.3 Hz, 2H), 6.92 (dd, *J* = 5.1, 3.4 Hz, 2H), 6.88 (d, *J* = 3.4 Hz, 2H), 6.83 (s, 4H), 4.54 (s, 4H), 2.85 (s, 6H). <sup>13</sup>C NMR (101 MHz, CDCl<sub>3</sub>) δ 142.6, 142.3, 126.5, 125.1, 124.3, 116.0, 53.6, 38.7.

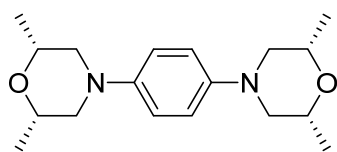

**1,4-bis((2R,6S)-2,6-dimethylmorpholino)benzene (3o):** green solid was obtained with 87% isolated yield, m.p. 133–135 °C. <sup>1</sup>H NMR (400 MHz, CDCl<sub>3</sub>) δ 6.88 (s, 4H), 3.89 – 3.76 (m, 4H), 3.33 (d, *J* = 11.6 Hz, 4H), 2.36 (t, *J* = 11.0 Hz, 4H), 1.25 (s, 6H), 1.24 (s, 6H). <sup>13</sup>C NMR (101 MHz, CDCl<sub>3</sub>) δ 145.0, 117.4, 71.7, 56.0, 19.0. HRMS (ESI): *m/z* calcd. for C<sub>18</sub>H<sub>29</sub>N<sub>2</sub>O<sub>2</sub> [M+H]<sup>+</sup>: 305.2224, found: 305.2221.

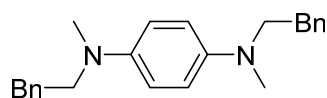

***N*<sup>1</sup>,*N*<sup>4</sup>-dimethyl-*N*<sup>1</sup>,*N*<sup>4</sup>-diphenethylbenzene-1,4-diamine (3p):** green solid was obtained with 53% isolated yield. <sup>1</sup>H NMR (400 MHz, CDCl<sub>3</sub>) δ 7.32 – 7.27 (m, 4H), 7.23 – 7.18 (m, 6H), 6.79 (s, 4H), 3.50 – 3.43 (m, 4H), 2.88 – 2.80 (m, 10H). <sup>13</sup>C NMR (101 MHz, CDCl<sub>3</sub>) δ 140.1, 128.8, 128.4, 126.0, 115.3, 56.1, 39.2, 32.7.

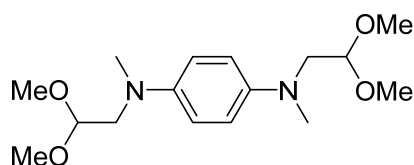

***N*<sup>1</sup>,*N*<sup>4</sup>-bis(2,2-dimethoxyethyl)-*N*<sup>1</sup>,*N*<sup>4</sup>-dimethylbenzene-1,4-diamine (3q):** colorless oil was obtained with 43% isolated yield. <sup>1</sup>H NMR (400 MHz, CDCl<sub>3</sub>) δ 6.76 (s, 4H),

4.50 (t,  $J = 5.1$  Hz, 2H), 3.39 (s, 12H), 3.34 (s, 4H), 2.92 (s, 6H).  $^{13}\text{C}$  NMR (101 MHz,  $\text{CDCl}_3$ )  $\delta$  142.2, 114.7, 103.4, 56.6, 54.3, 39.9.

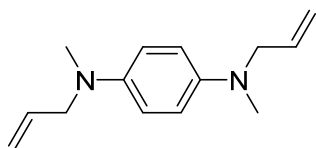

***N*<sup>1</sup>,*N*<sup>4</sup>-diallyl-*N*<sup>1</sup>,*N*<sup>4</sup>-dimethylbenzene-1,4-diamine (3r)**: colorless oil was obtained with 34% isolated yield.  $^1\text{H}$  NMR (400 MHz,  $\text{CDCl}_3$ )  $\delta$  6.75 (s, 4H), 5.93 – 5.79 (m, 2H), 5.21 – 5.11 (m, 4H), 3.79 (s, 4H), 2.83 (s, 6H).  $^{13}\text{C}$  NMR (101 MHz,  $\text{CDCl}_3$ )  $\delta$  142.6, 134.7, 116.4, 115.4, 57.0, 38.8.

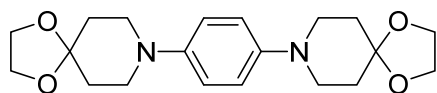

**1,4-di(1,4-dioxo-8-azaspiro[4.5]decan-8-yl)benzene (3s)**: white solid was obtained with 48% isolated yield.  $^1\text{H}$  NMR (400 MHz,  $\text{CDCl}_3$ )  $\delta$  6.91 (s, 4H), 3.99 (s, 8H), 3.23 – 3.18 (m, 8H), 1.88 – 1.83 (m, 8H).  $^{13}\text{C}$  NMR (101 MHz,  $\text{CDCl}_3$ )  $\delta$  145.0, 118.3, 107.1, 64.2, 49.0, 34.7.

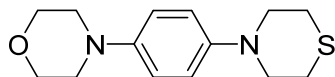

**4-(4-thiomorpholinophenyl)morpholine(4a)**: Pale yellow solid was obtained with 70% isolated yield, m.p. 130–132 °C.  $^1\text{H}$  NMR (400 MHz,  $\text{CDCl}_3$ )  $\delta$  6.89 (d,  $J = 1.7$  Hz, 4H), 3.85 (dd,  $J = 5.9, 3.6$  Hz, 4H), 3.38 (dd,  $J = 6.4, 3.6$  Hz, 4H), 3.10 – 3.05 (m, 4H), 2.80 – 2.75 (m, 4H).  $^{13}\text{C}$  NMR (101 MHz,  $\text{CDCl}_3$ )  $\delta$  146.0, 145.6, 119.3, 117.2, 67.0, 53.4, 50.3, 27.5. HRMS (ESI):  $m/z$  calcd. for  $\text{C}_{14}\text{H}_{21}\text{N}_2\text{OS}$   $[\text{M}+\text{H}]^+$ : 265.1369, found: 265.1363.

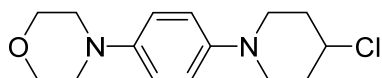

**4-(4-(4-chloropiperidin-1-yl)phenyl)morpholine (4b)**: yellow solid was obtained with 39% isolated yield, m.p. 114–116 °C.  $^1\text{H}$  NMR (400 MHz,  $\text{CDCl}_3$ )  $\delta$  6.95 – 6.84 (m, 4H), 4.21 – 4.13 (m, 1H), 3.94 – 3.78 (m, 4H), 3.45 – 3.35 (m, 2H), 3.14 – 3.01 (m,



4H), 2.99 – 2.90 (m, 2H), 2.26 – 2.17 (m, 2H), 2.06 – 1.97 (m, 2H).  $^{13}\text{C}$  NMR (101 MHz,  $\text{CDCl}_3$ )  $\delta$  145.4, 145.4, 118.4, 117.3, 67.0, 57.2, 50.4, 48.7, 35.3. HRMS (ESI):  $m/z$  calcd. for  $\text{C}_{15}\text{H}_{22}\text{ClN}_2\text{O}$   $[\text{M}+\text{H}]^+$ : 281.1415, found: 281.1413.

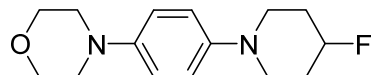

**4-(4-(4-fluoropiperidin-1-yl)phenyl)morpholine (4c):** white solid was obtained with 44% isolated yield, m.p. 121–123 °C.  $^1\text{H}$  NMR (400 MHz,  $\text{CDCl}_3$ )  $\delta$  6.96 – 6.90 (m, 2H), 6.90 – 6.85 (m, 2H), 4.88 – 4.81 (m, 1H), 4.76 – 4.69 (m, 1H), 3.90 – 3.82 (m, 4H), 3.31 – 3.21 (m, 2H), 3.11 – 3.01 (m, 6H), 2.08 – 1.95 (m, 4H).  $^{13}\text{C}$  NMR (101 MHz,  $\text{CDCl}_3$ )  $\delta$  145.5, 145.3, 118.4, 117.2, 89.2, 87.5, 67.0, 50.4, 47.2, 47.1, 31.4, 31.2.  $^{19}\text{F}$  NMR (376 MHz,  $\text{CDCl}_3$ )  $\delta$  -180.96. HRMS (ESI):  $m/z$  calcd. for  $\text{C}_{15}\text{H}_{22}\text{FN}_2\text{O}$   $[\text{M}+\text{H}]^+$ : 265.1711, found: 265.1707.

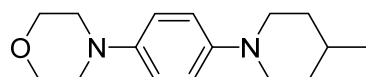

**4-(4-(4-methylpiperidin-1-yl)phenyl)morpholine (4d):** colourless solid was obtained with 43% isolated yield, m.p. 117–119 °C.  $^1\text{H}$  NMR (400 MHz,  $\text{CDCl}_3$ )  $\delta$  6.96 – 6.90 (m, 2H), 6.90 – 6.85 (m, 2H), 3.89 – 3.81 (m, 4H), 3.55 – 3.47 (m, 2H), 3.10 – 3.02 (m, 4H), 2.66 – 2.57 (m, 2H), 1.76 – 1.70 (m, 2H), 1.52 – 1.43 (m, 1H), 1.43 – 1.34 (m, 2H), 0.97 (d,  $J$  = 6.1 Hz, 3H).  $^{13}\text{C}$  NMR (101 MHz,  $\text{CDCl}_3$ )  $\delta$  146.4, 144.9, 118.2, 117.2, 67.0, 51.2, 50.5, 34.3, 30.6, 21.9. HRMS (ESI):  $m/z$  calcd. for  $\text{C}_{16}\text{H}_{25}\text{N}_2\text{O}$   $[\text{M}+\text{H}]^+$ : 261.1962, found: 261.1961.

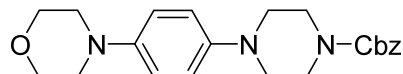

**benzyl 4-(4-morpholinophenyl)piperazine-1-carboxylate (4e):** white solid was obtained with 40% isolated yield, m.p. 143–145 °C.  $^1\text{H}$  NMR (400 MHz,  $\text{CDCl}_3$ )  $\delta$  7.40 – 7.31 (m, 5H), 6.89 (d,  $J$  = 2.5 Hz, 4H), 5.16 (s, 2H), 3.89 – 3.82 (m, 4H), 3.66 (t,  $J$  = 5.1 Hz, 4H), 3.10 – 2.99 (m, 8H).  $^{13}\text{C}$  NMR (101 MHz,  $\text{CDCl}_3$ )  $\delta$  155.2, 145.8, 145.2, 136.6, 128.5, 128.0, 127.9, 118.4, 117.2, 67.2, 67.0, 50.5, 50.3, 43.9. HRMS (ESI):  $m/z$  calcd. for  $\text{C}_{22}\text{H}_{28}\text{N}_3\text{O}_3$   $[\text{M}+\text{H}]^+$ : 382.2125, found: 382.2119.

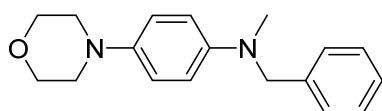

***N*-benzyl-*N*-methyl-4-morpholinoaniline (4f):** grey solid was obtained with 47% isolated yield, m.p.95–97 °C.  $^1\text{H}$  NMR (400 MHz,  $\text{CDCl}_3$ )  $\delta$  7.30 (d,  $J = 6.7$  Hz, 2H), 7.26 – 7.21 (m, 3H), 6.91 – 6.85 (m, 2H), 6.78 – 6.72 (m, 2H), 4.45 (s, 2H), 3.90 – 3.82 (m, 4H), 3.08 – 3.00 (m, 4H), 2.93 (s, 3H).  $^{13}\text{C}$  NMR (101 MHz,  $\text{CDCl}_3$ )  $\delta$  144.9, 142.9, 139.2, 128.4, 127.0, 126.8, 118.1, 114.0, 67.1, 57.5, 51.1, 38.8. HRMS (ESI):  $m/z$  calcd. for  $\text{C}_{18}\text{H}_{23}\text{N}_2\text{O}$   $[\text{M}+\text{H}]^+$ : 283.1805, found: 283.1795.

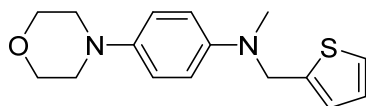

***N*-methyl-4-morpholino-*N*-(thiophen-2-ylmethyl)aniline (4g):** black solid was obtained with 72% isolated yield, m.p.92–94 °C.  $^1\text{H}$  NMR (400 MHz,  $\text{CDCl}_3$ )  $\delta$  7.16 (dd,  $J = 5.1, 1.3$  Hz, 1H), 6.94 – 6.91 (m, 1H), 6.91 – 6.86 (m, 3H), 6.84 – 6.79 (m, 2H), 4.59 (s, 2H), 3.88 – 3.83 (m, 4H), 3.08 – 3.02 (m, 4H), 2.89 (s, 3H).  $^{13}\text{C}$  NMR (101 MHz,  $\text{CDCl}_3$ )  $\delta$  144.2, 143.6, 142.2, 126.6, 125.0, 124.3, 117.8, 115.1, 67.1, 53.0, 50.9, 38.5. HRMS (ESI):  $m/z$  calcd. for  $\text{C}_{16}\text{H}_{21}\text{N}_2\text{OS}$   $[\text{M}+\text{H}]^+$ : 289.1369, found: 289.1361.

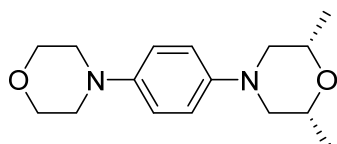

**(2*R*,6*S*)-2,6-dimethyl-4-(4-morpholinophenyl)morpholine (4h):** brown solid was obtained with 61% isolated yield, m.p.88–90 °C.  $^1\text{H}$  NMR (400 MHz,  $\text{CDCl}_3$ )  $\delta$  6.89 (s, 4H), 3.88 – 3.84 (m, 4H), 3.38 – 3.30 (m, 2H), 3.10 – 3.01 (m, 4H), 2.36 (t,  $J = 11.0$  Hz, 2H), 1.25 (d,  $J = 6.2$  Hz, 6H).  $^{13}\text{C}$  NMR (101 MHz,  $\text{CDCl}_3$ )  $\delta$  145.2, 145.2, 117.4, 117.3, 71.7, 67.0, 55.9, 50.4, 19.0. HRMS (ESI):  $m/z$  calcd. for  $\text{C}_{16}\text{H}_{25}\text{N}_2\text{O}_2$   $[\text{M}+\text{H}]^+$ : 277.1911, found: 277.1907.

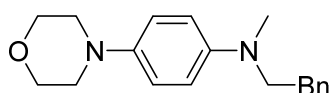

***N*-methyl-4-morpholino-*N*-phenethylaniline (4i):** grey solid was obtained with 78% isolated yield, m.p. 78–80 °C. <sup>1</sup>H NMR (400 MHz, CDCl<sub>3</sub>) δ 7.32 – 7.26 (m, 2H), 7.23 – 7.17 (m, 3H), 6.94 – 6.88 (m, 2H), 6.76 – 6.71 (m, 2H), 3.89 – 3.84 (m, 4H), 3.54 – 3.47 (m, 2H), 3.07 – 3.02 (m, 4H), 2.86 (s, 3H), 2.85 – 2.79 (m, 2H). <sup>13</sup>C NMR (101 MHz, CDCl<sub>3</sub>) δ 143.9, 142.6, 139.9, 128.7, 128.4, 126.1, 118.2, 113.8, 67.1, 55.4, 51.1, 38.8, 32.7. HRMS (ESI): *m/z* calcd. for C<sub>19</sub>H<sub>25</sub>N<sub>2</sub>O [M+H]<sup>+</sup>: 297.1962, found: 297.1952.

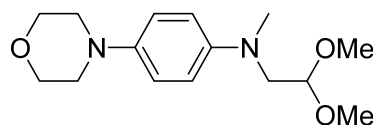

***N*-(2,2-dimethoxyethyl)-*N*-methyl-4-morpholinoaniline (4j):** black solid was obtained with 45% isolated yield, m.p. 49–51 °C. <sup>1</sup>H NMR (400 MHz, CDCl<sub>3</sub>) δ 6.94 – 6.85 (m, 2H), 6.78 – 6.69 (m, 2H), 4.50 (t, *J* = 5.1 Hz, 1H), 3.89 – 3.80 (m, 4H), 3.39 (m, 8H), 3.06 – 3.00 (m, 4H), 2.95 (s, 3H). <sup>13</sup>C NMR (101 MHz, CDCl<sub>3</sub>) δ 144.4, 142.7, 118.1, 113.4, 103.3, 67.1, 56.0, 54.4, 51.1, 39.5. HRMS (ESI): *m/z* calcd. for C<sub>15</sub>H<sub>25</sub>N<sub>2</sub>O<sub>3</sub> [M+H]<sup>+</sup>: 281.186, found: 281.1855.

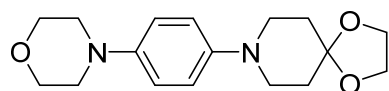

**8-(4-morpholinophenyl)-1,4-dioxaspiro[4.5]decane (4K):** yellow solid was obtained with 53% isolated yield, m.p. 152–154 °C. <sup>1</sup>H NMR (400 MHz, CDCl<sub>3</sub>) δ 7.0 – 6.9 (m, 2H), 6.9 – 6.8 (m, 2H), 4.0 (s, 4H), 3.4 – 3.3 (m, 4H), 3.3 – 3.2 (m, 4H), 2.8 – 2.7 (m, 4H), 1.9 (s, 4H). <sup>13</sup>C NMR (101 MHz, CDCl<sub>3</sub>) δ 145.9, 145.7, 119.2, 118.3, 107.1, 64.3, 53.4, 48.9, 34.7, 27.5. HRMS (ESI): *m/z* calcd. for C<sub>17</sub>H<sub>25</sub>N<sub>2</sub>O<sub>2</sub>S [M+H]<sup>+</sup>: 321.1631, found: 321.1626.

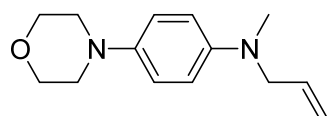

***N*-allyl-*N*-methyl-4-morpholinoaniline (4l):** brown oil was obtained with 38% isolated yield. <sup>1</sup>H NMR (400 MHz, CDCl<sub>3</sub>) 6.91 – 6.84 (m, 2H), 6.76 – 6.70 (m, 2H),

5.90 – 5.78 (m, 1H), 5.21 – 5.11 (m, 2H), 3.89 – 3.82 (m, 6H), 3.06 – 3.00 (m, 4H), 2.87 (s, 3H).  $^{13}\text{C}$  NMR (101 MHz,  $\text{CDCl}_3$ )  $\delta$  144.6, 142.9, 134.2, 118.0, 116.4, 114.2, 67.1, 56.2, 51.1, 38.4. HRMS (ESI):  $m/z$  calcd. for  $\text{C}_{14}\text{H}_{21}\text{N}_2\text{O}$   $[\text{M}+\text{H}]^+$ : 233.1649, found: 233.1642.

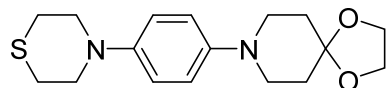

**8-(4-thiomorpholinophenyl)-1,4-dioxo-8-azaspiro[4.5]decane (4m):** yellow solid was obtained with 46% isolated yield, m.p. 152–154 °C.  $^1\text{H}$  NMR (400 MHz,  $\text{CDCl}_3$ )  $\delta$  6.94 – 6.84 (m, 4H), 3.99 (s, 4H), 3.41 – 3.34 (m, 4H), 3.24 – 3.16 (m, 4H), 2.80 – 2.74 (m, 4H), 1.89 – 1.83 (m, 4H).  $^{13}\text{C}$  NMR (101 MHz,  $\text{CDCl}_3$ )  $\delta$  145.8, 145.6, 119.2, 118.3, 107.06, 64.3, 53.4, 48.8, 34.7, 27.5. HRMS (ESI):  $m/z$  calcd. for  $\text{C}_{17}\text{H}_{25}\text{N}_2\text{O}_2\text{S}$   $[\text{M}+\text{H}]^+$ : 321.1631, found: 321.1626.

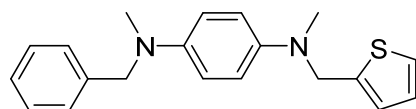

**$N^1$ -benzyl- $N^1,N^4$ -dimethyl- $N^4$ -(thiophen-2-ylmethyl)benzene-1,4-diamine (4n):** black solid was obtained with 32% isolated yield, m.p. 81–83 °C.  $^1\text{H}$  NMR (400 MHz,  $\text{CDCl}_3$ )  $\delta$  7.73 – 7.23 (m, 5H), 7.16 (d,  $J = 5.0$  Hz, 1H), 6.95 – 6.90 (m, 1H), 6.90 – 6.87 (m, 1H), 6.87 – 6.67 (m, 4H), 4.52 (s, 2H), 4.40 (s, 2H), 2.86 (d,  $J = 22.3$  Hz, 6H).  $^{13}\text{C}$  NMR (101 MHz,  $\text{CDCl}_3$ )  $\delta$  143.5, 142.4, 142.0, 139.4, 128.4, 127.2, 126.8, 126.5, 125.1, 124.29, 116.4, 114.8, 58.1, 53.8, 38.9, 38.9. HRMS (ESI):  $m/z$  calcd. for  $\text{C}_{20}\text{H}_{23}\text{N}_2\text{S}$   $[\text{M}+\text{H}]^+$ : 323.1577, found: 323.1561.

## 9.Copies of NMR spectra of all products

$^1\text{H}$  NMR spectra of **3a** (400 MHz,  $\text{CDCl}_3$ )

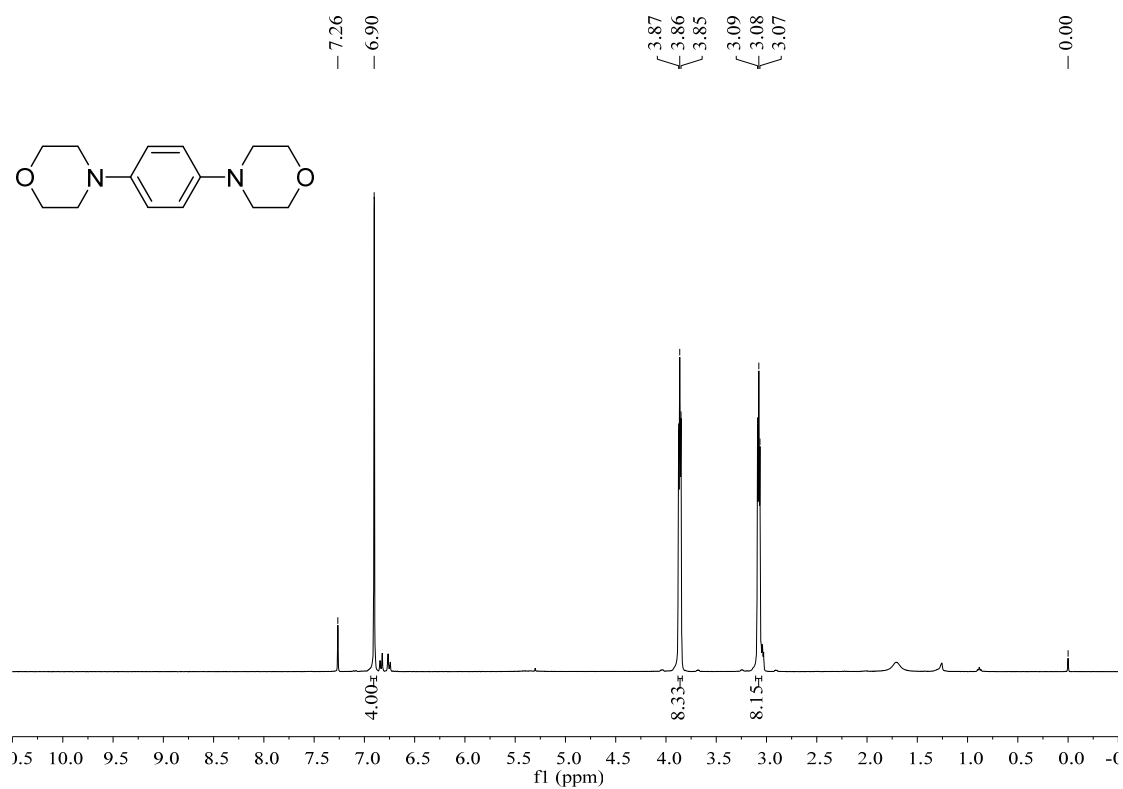

$^{13}\text{C}$  NMR spectra of **3a** (100 MHz,  $\text{CDCl}_3$ )

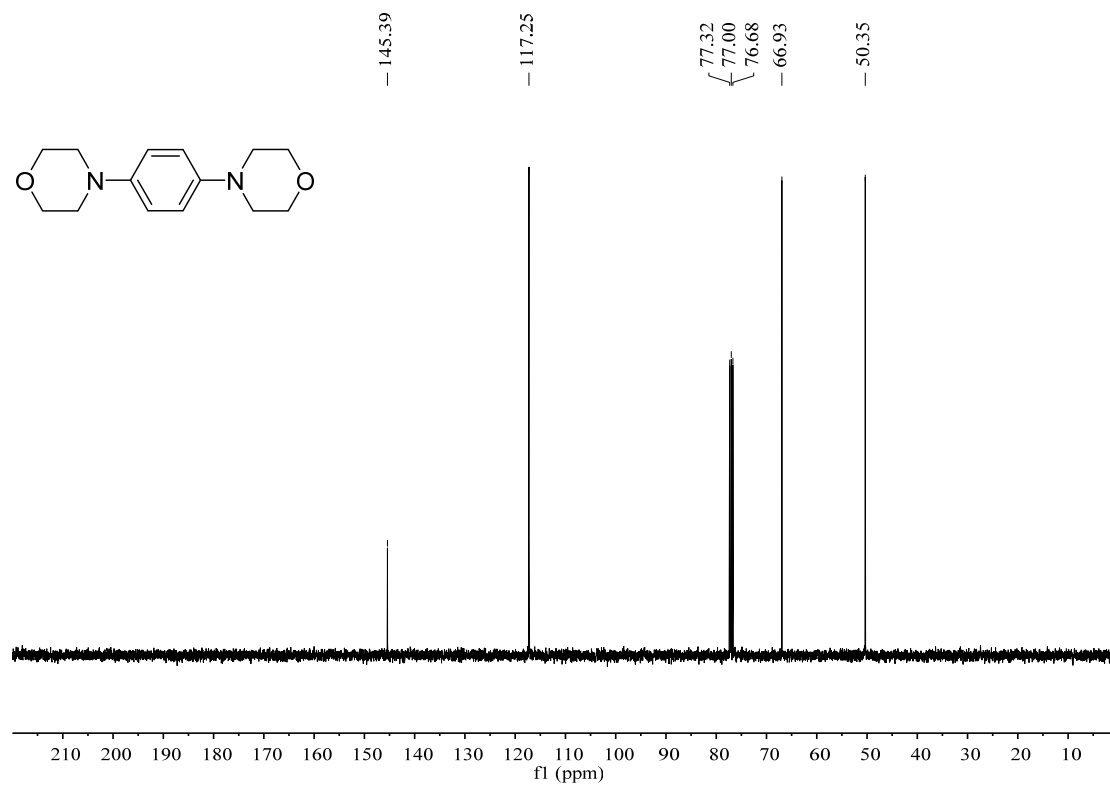

<sup>1</sup>H NMR spectra of **3b** (400 MHz, CDCl<sub>3</sub>)

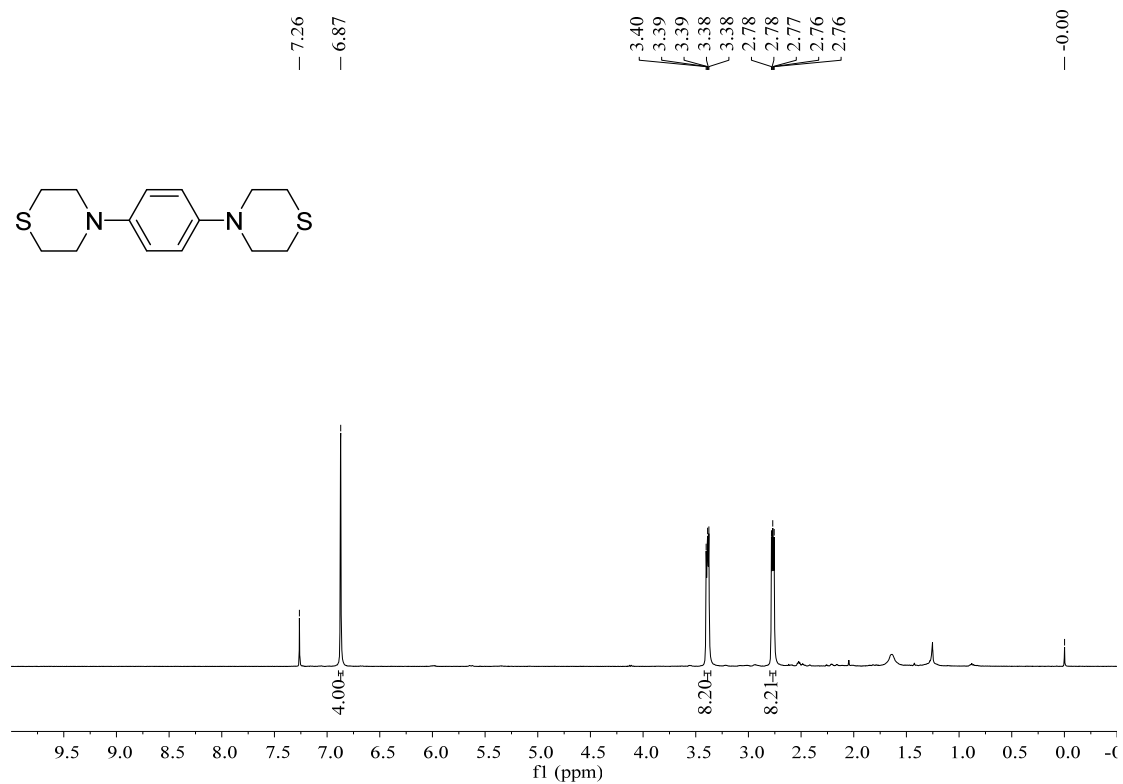

<sup>13</sup>C NMR spectra of **3b** (100 MHz, CDCl<sub>3</sub>)

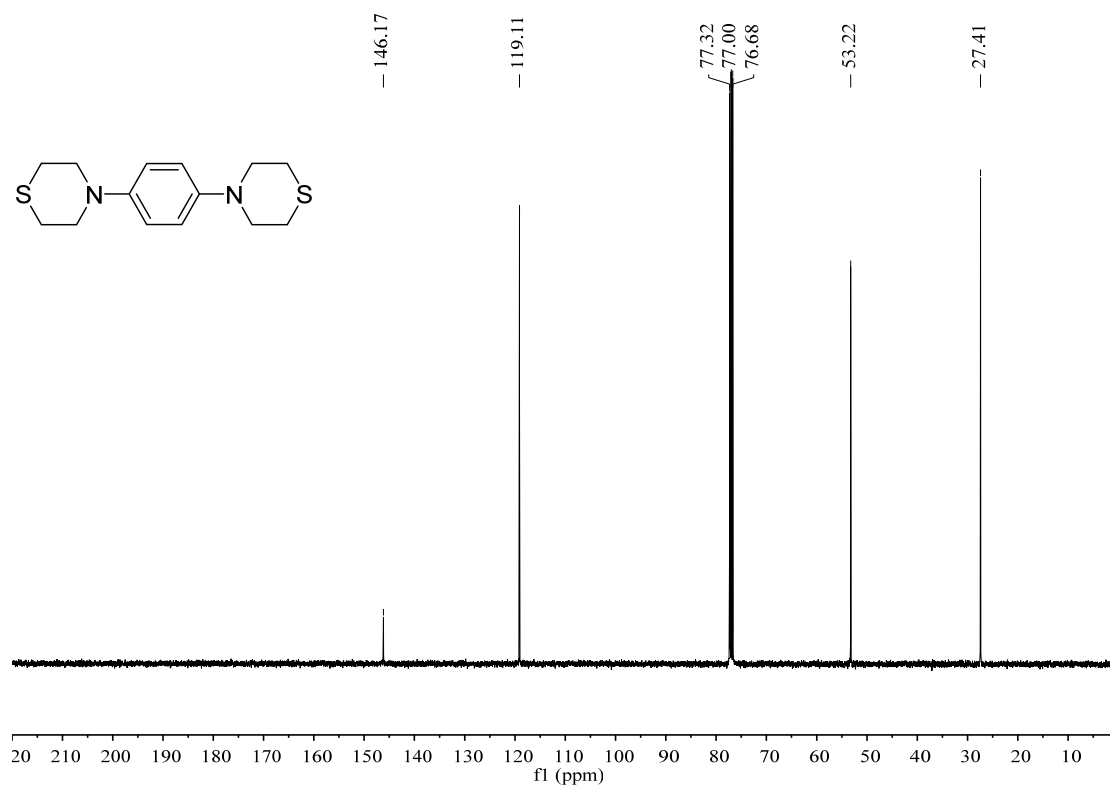

<sup>1</sup>H NMR spectra of **3c** (400 MHz, CDCl<sub>3</sub>)

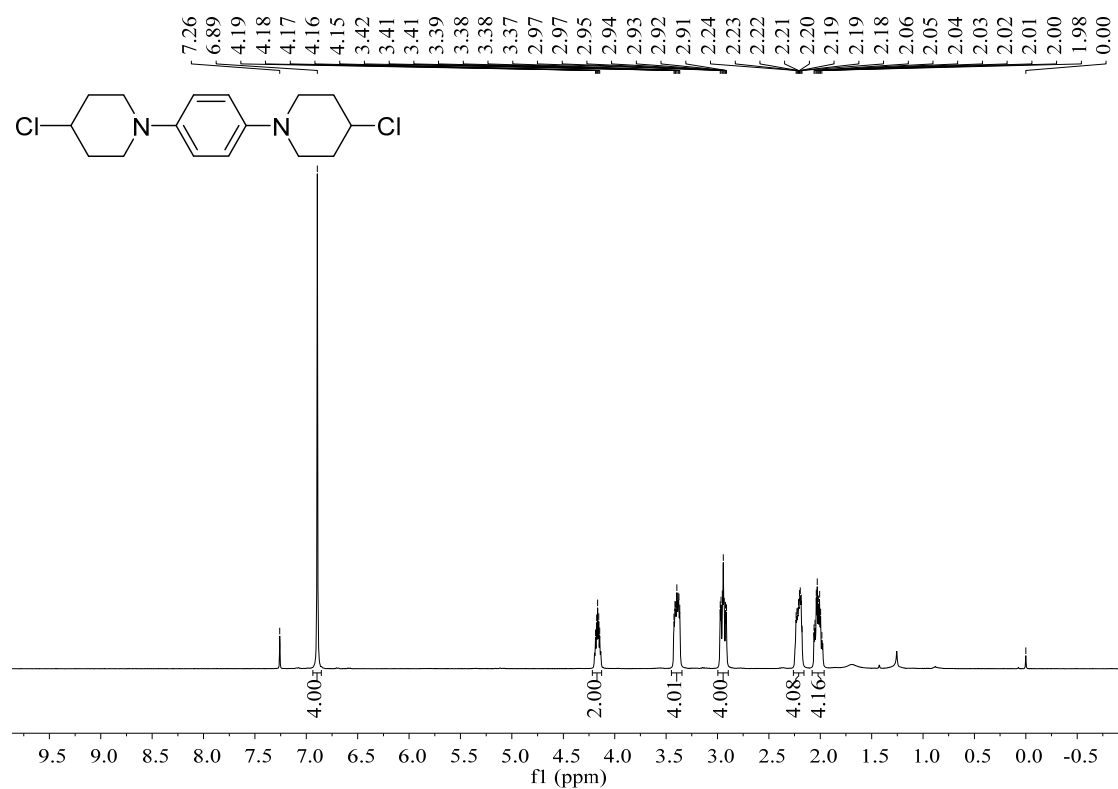

<sup>13</sup>C NMR spectra of **3c** (100 MHz, CDCl<sub>3</sub>)

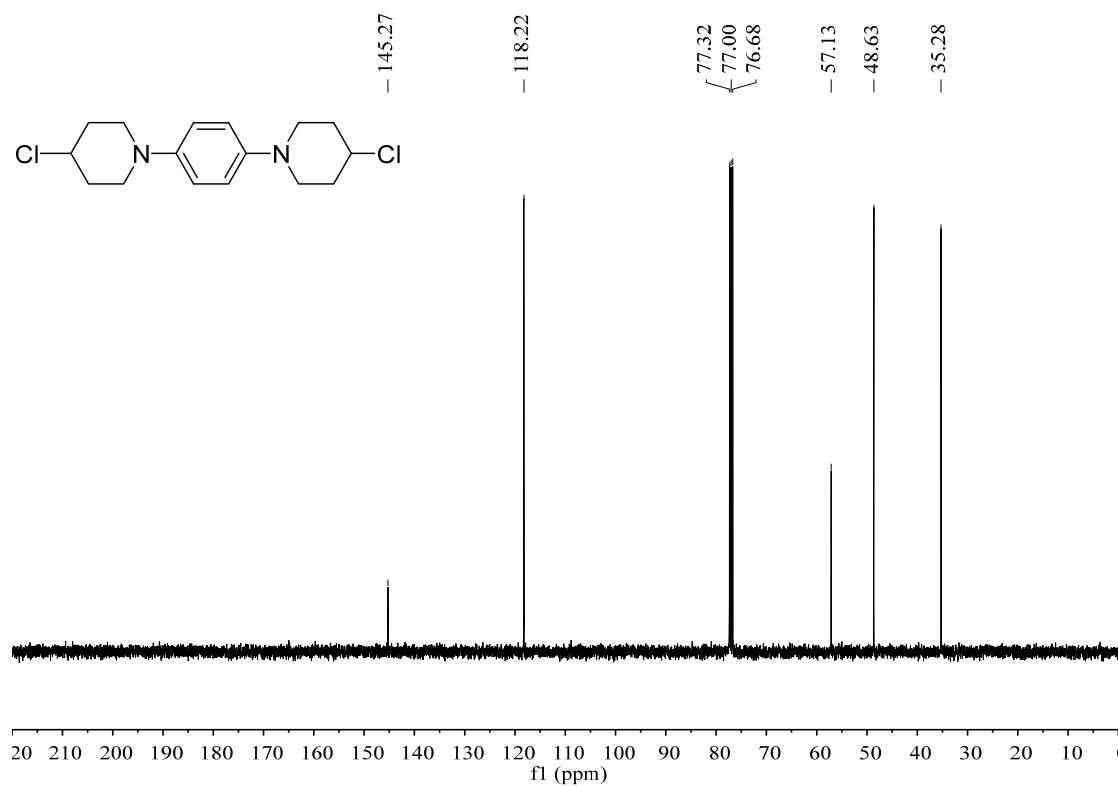

<sup>1</sup>H NMR spectra of **3d** (400 MHz, CDCl<sub>3</sub>)

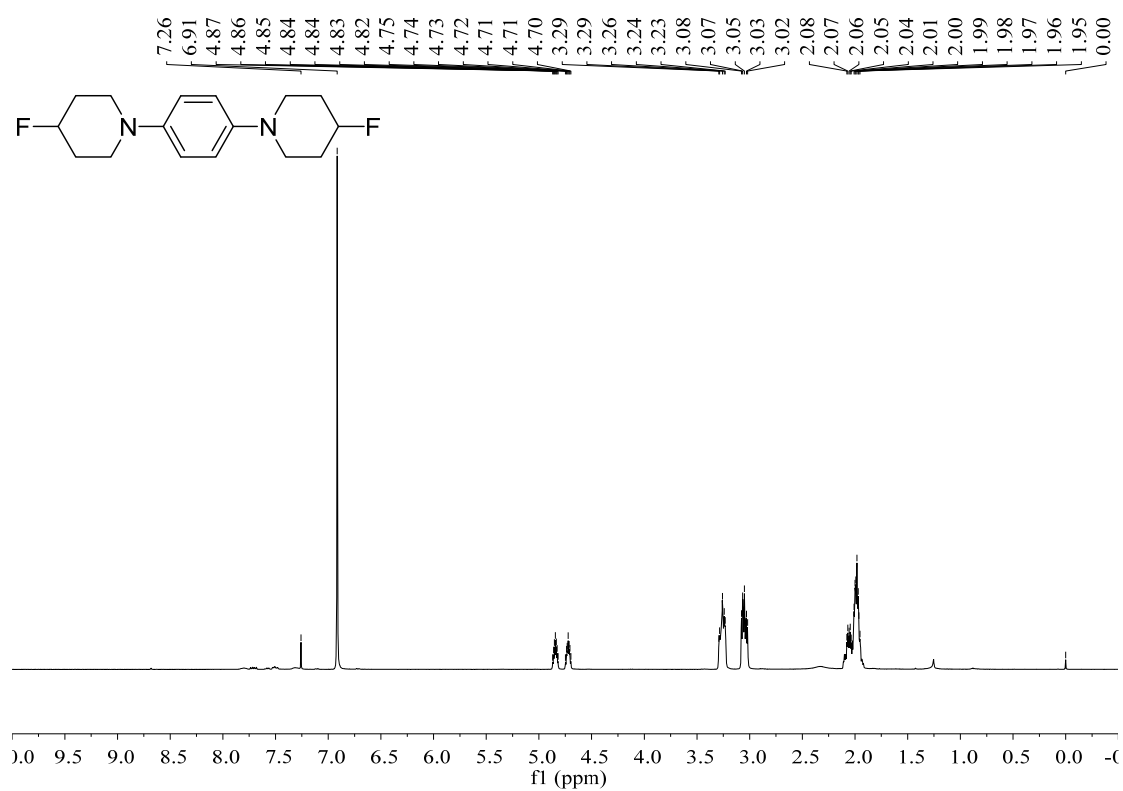

<sup>13</sup>C NMR spectra of **3d** (100 MHz, CDCl<sub>3</sub>)

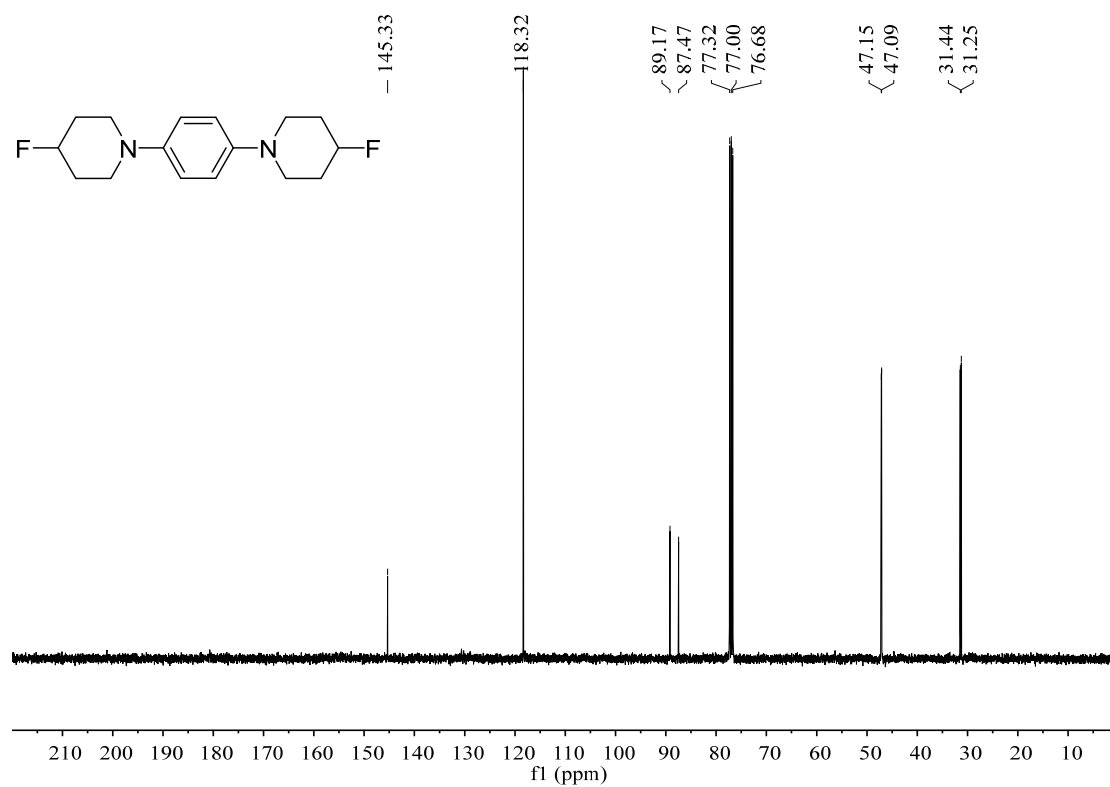



$^{19}\text{F}$  NMR spectra of **3d** (376 MHz,  $\text{CDCl}_3$ )

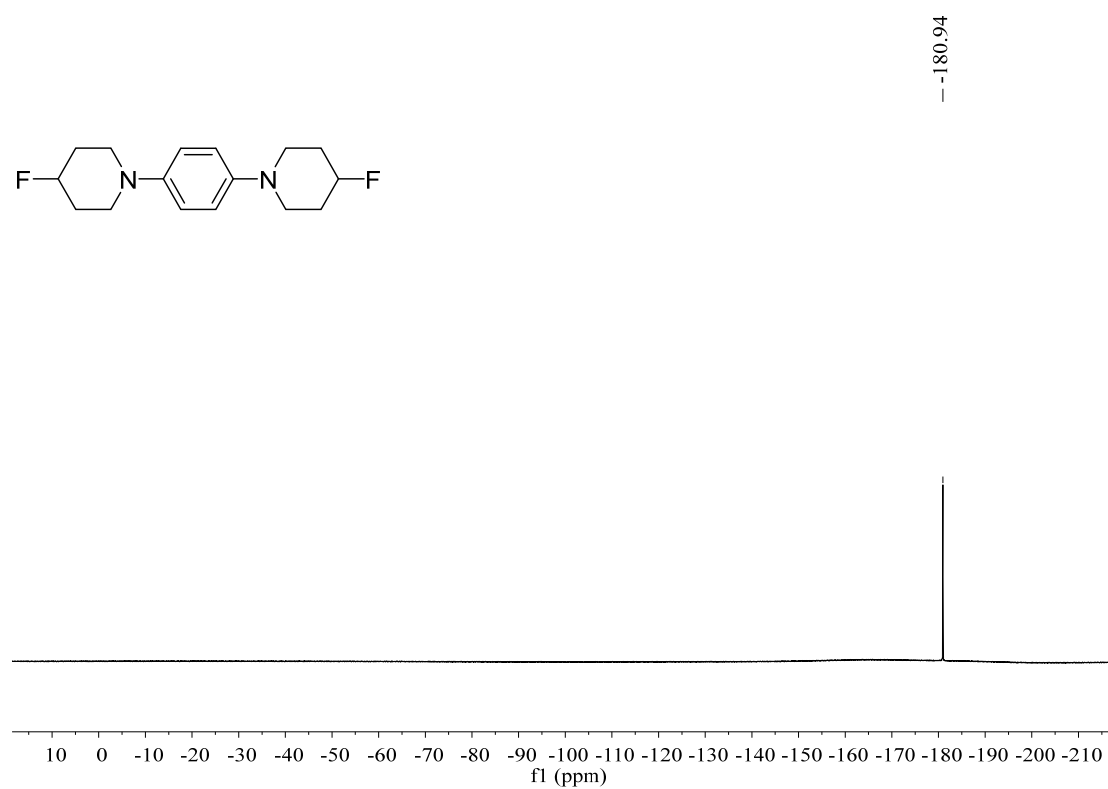

$^1\text{H}$  NMR spectra of **3e** (400 MHz,  $\text{CDCl}_3$ )

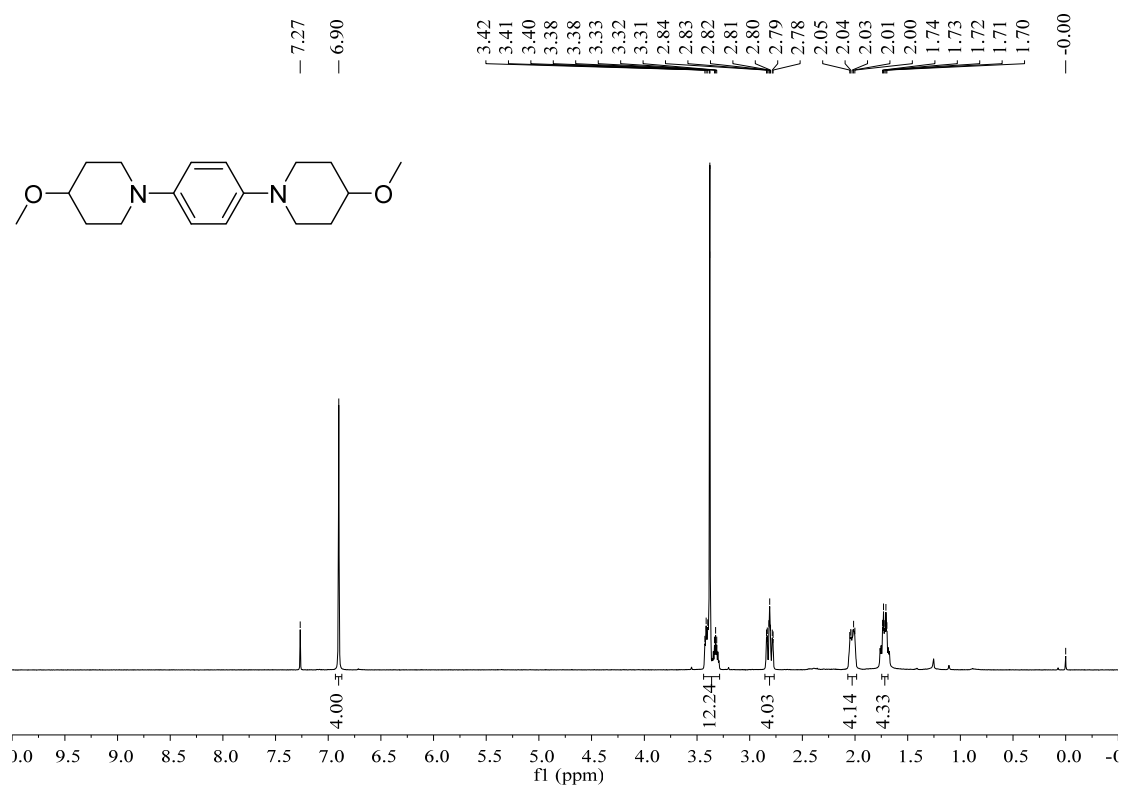

<sup>13</sup>C NMR spectra of **3e** (100 MHz, CDCl<sub>3</sub>)

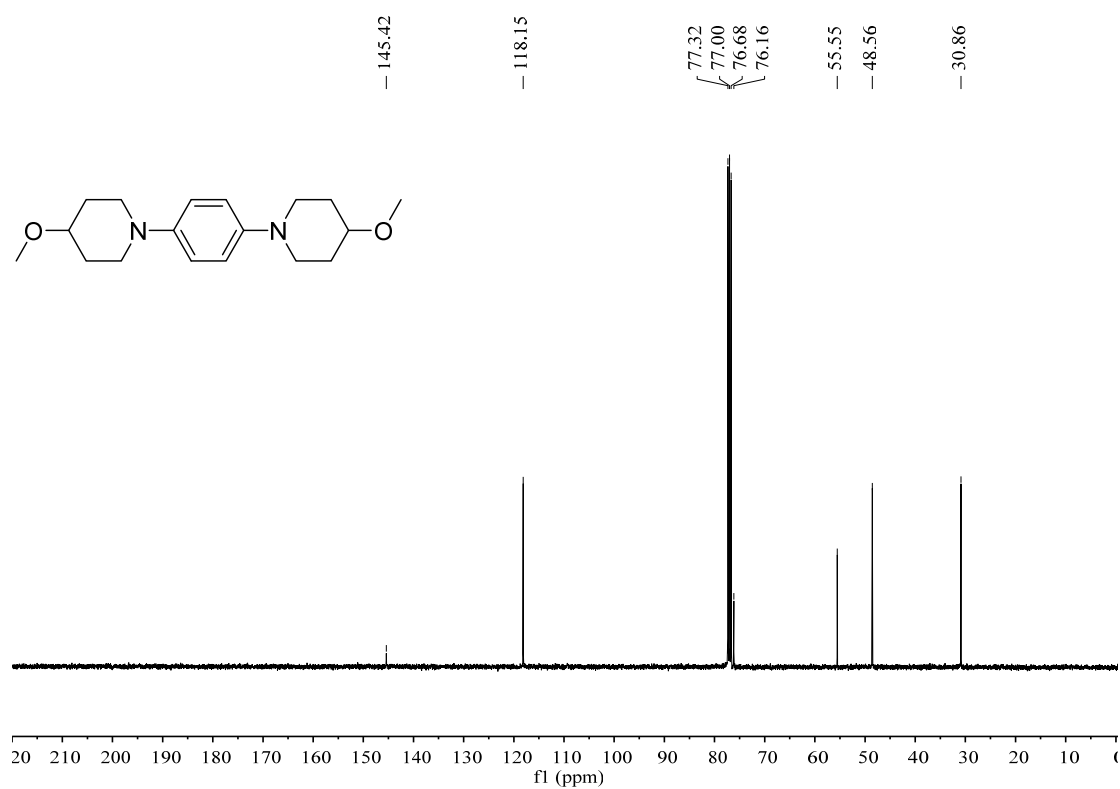

<sup>1</sup>H NMR spectra of **3f** (400 MHz, CDCl<sub>3</sub>)

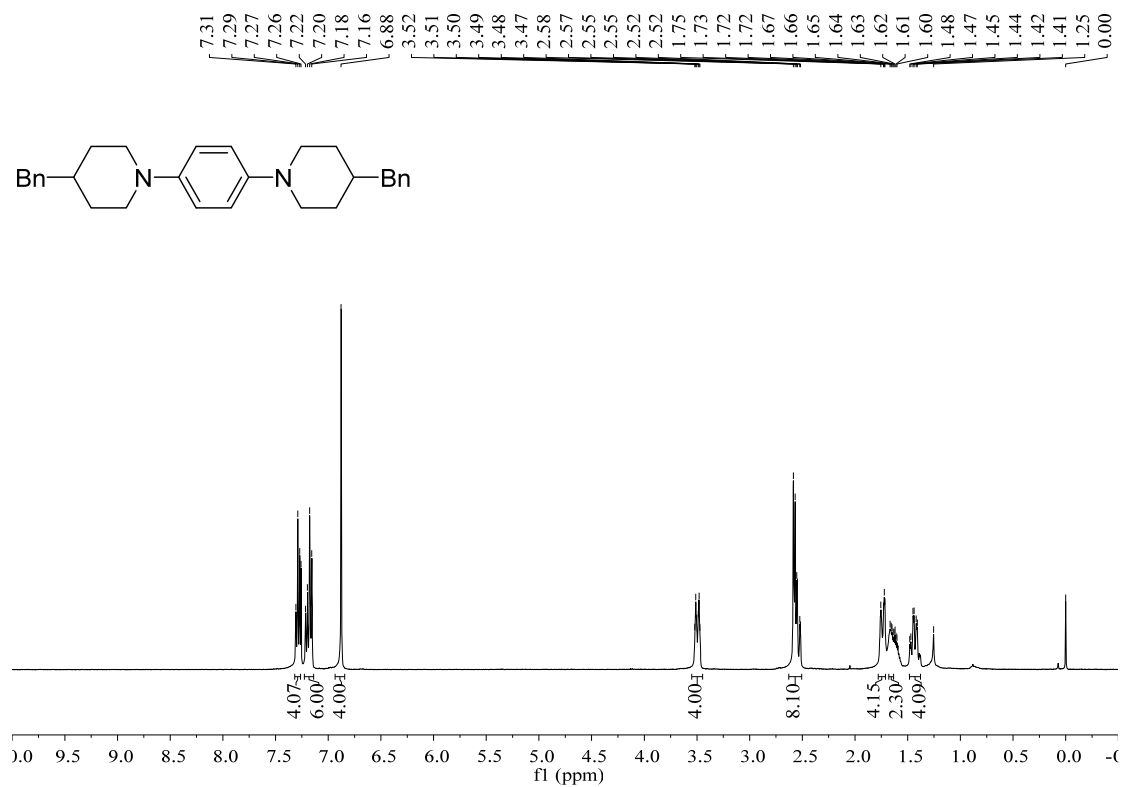

<sup>13</sup>C NMR spectra of **3f** (100 MHz, CDCl<sub>3</sub>)

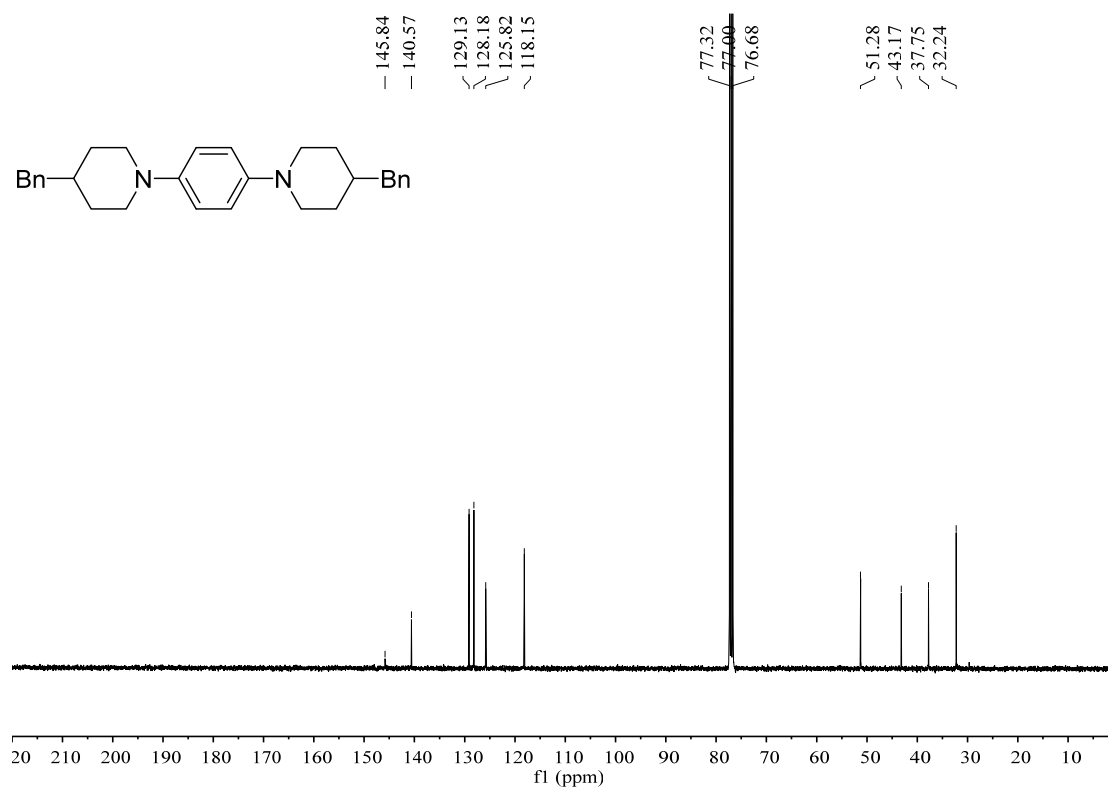

<sup>1</sup>H NMR spectra of **3g** (400 MHz, CDCl<sub>3</sub>)

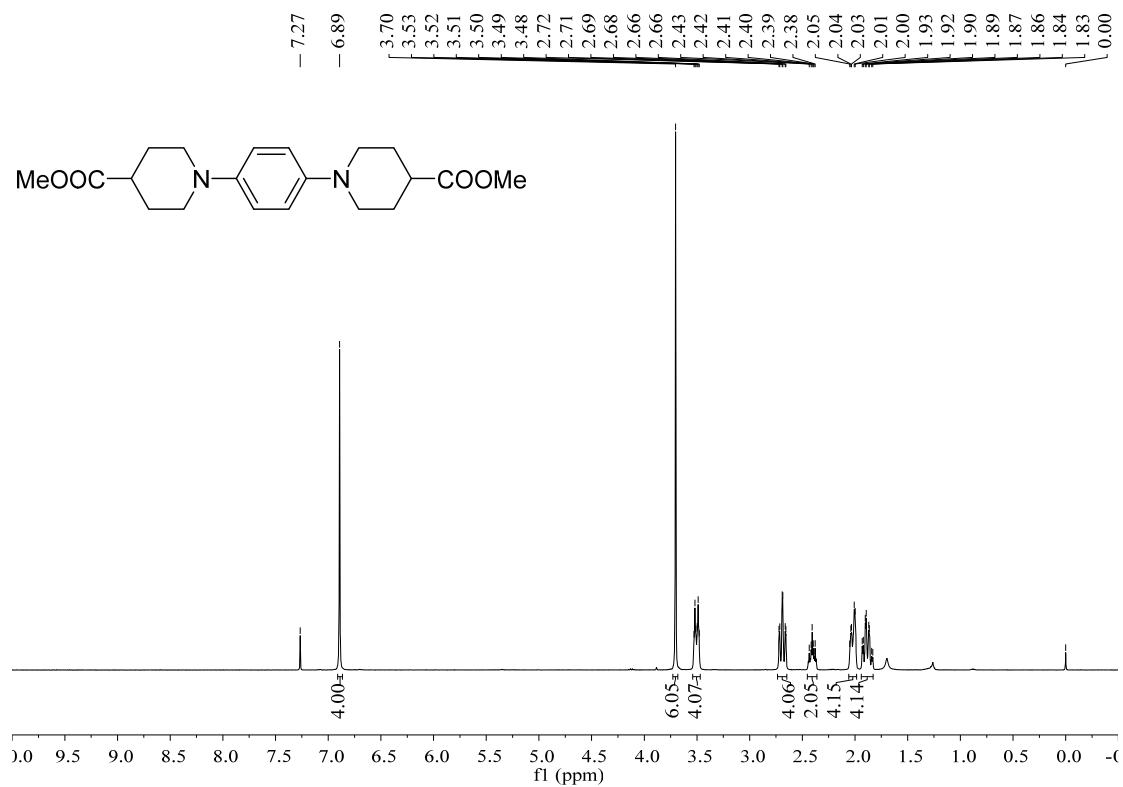

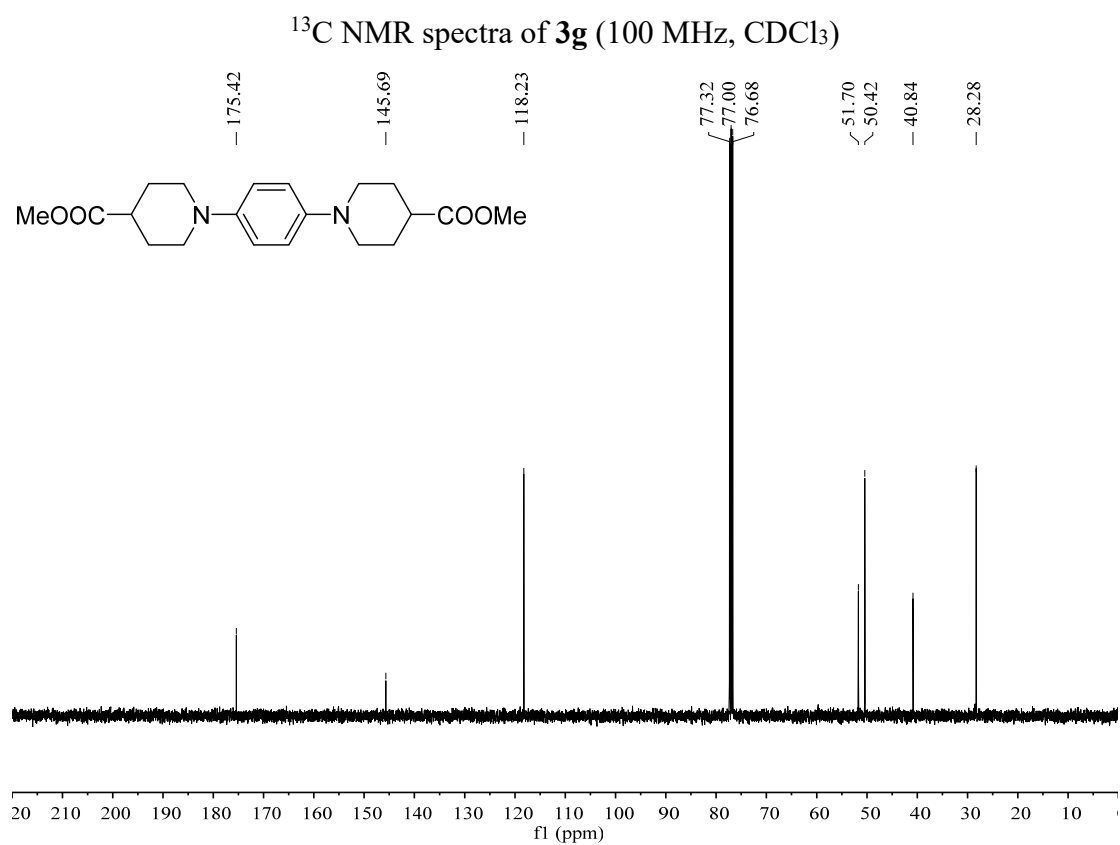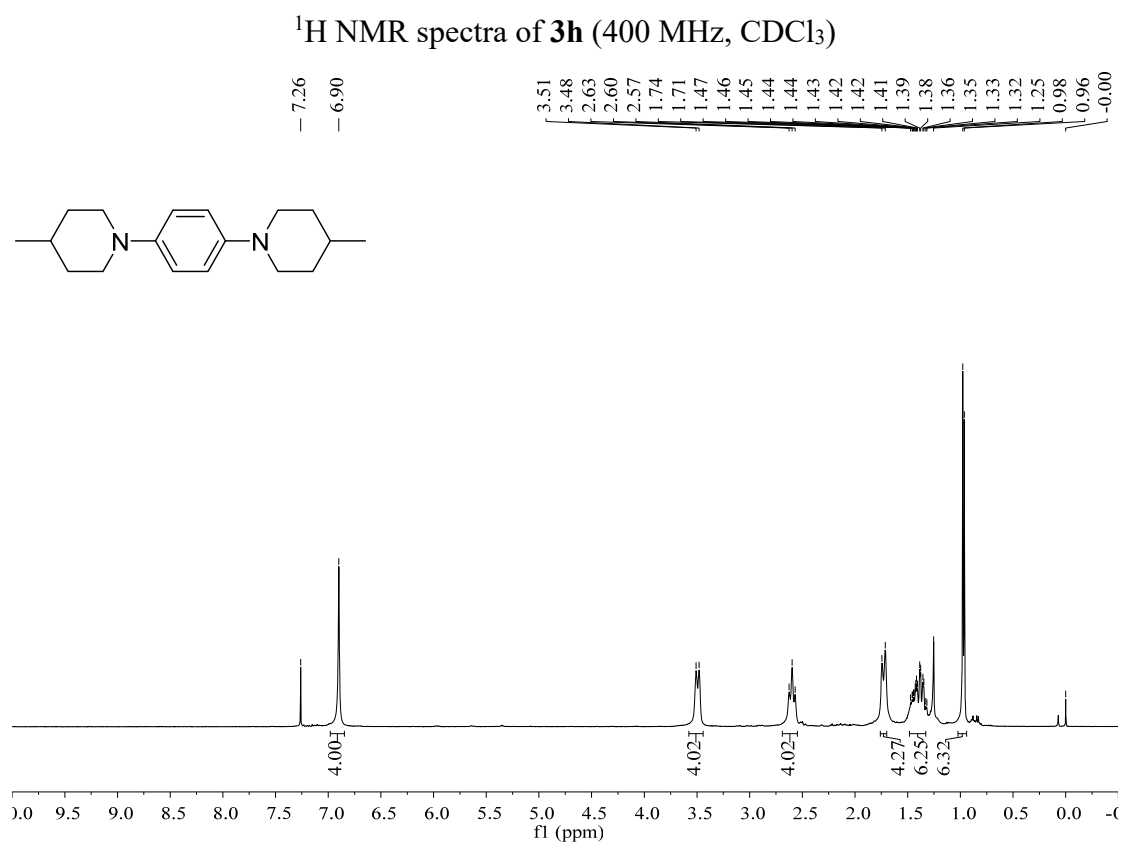

<sup>13</sup>C NMR spectra of **3h** (100 MHz, CDCl<sub>3</sub>)

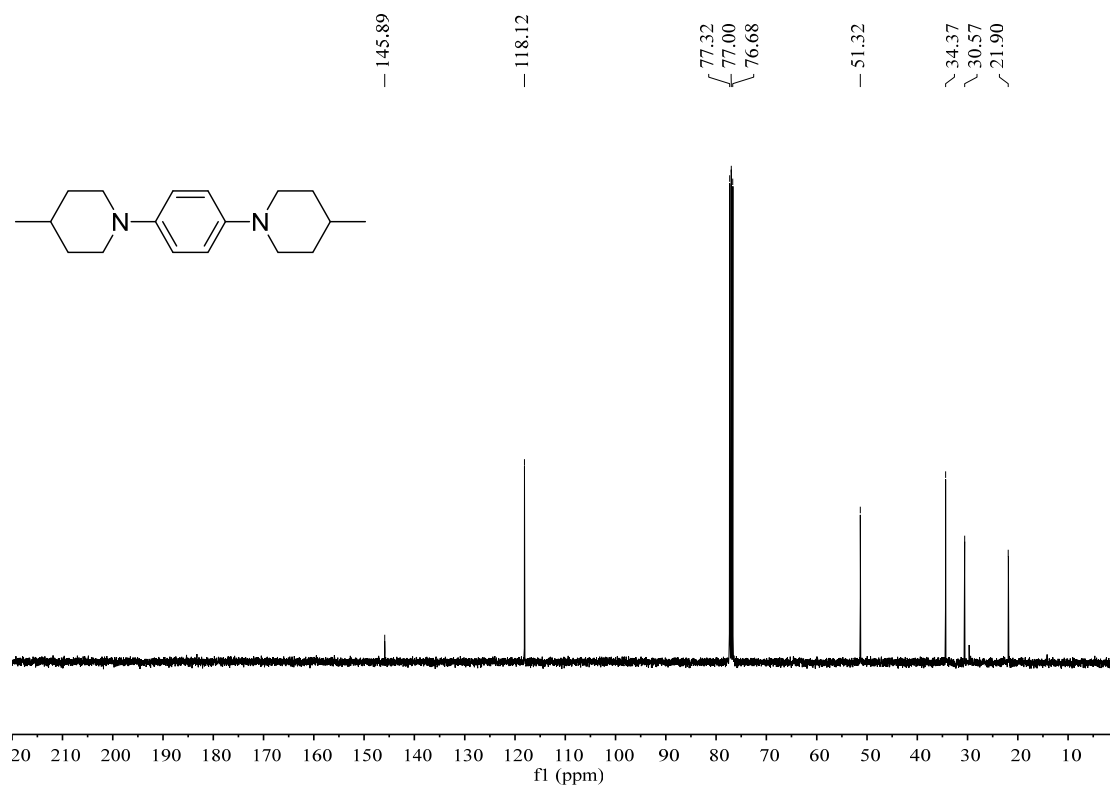

<sup>1</sup>H NMR spectra of **3i** (400 MHz, CDCl<sub>3</sub>)

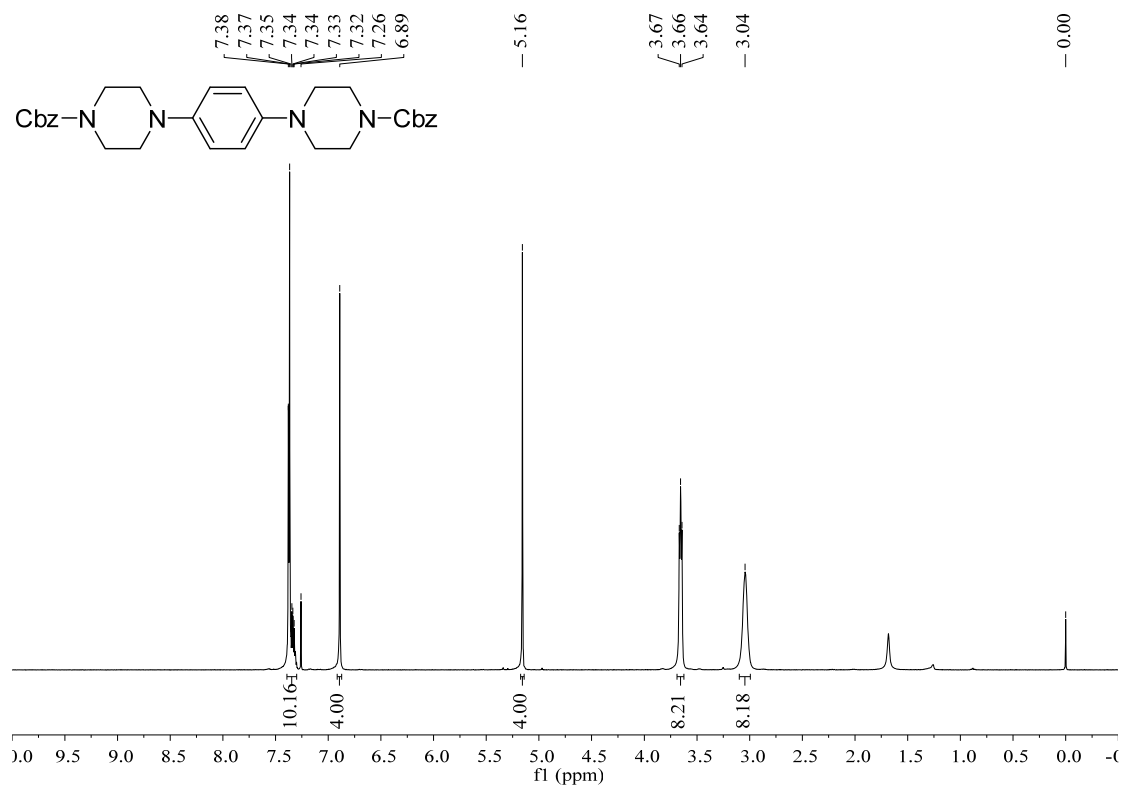

<sup>13</sup>C NMR spectra of **3i** (100 MHz, CDCl<sub>3</sub>)

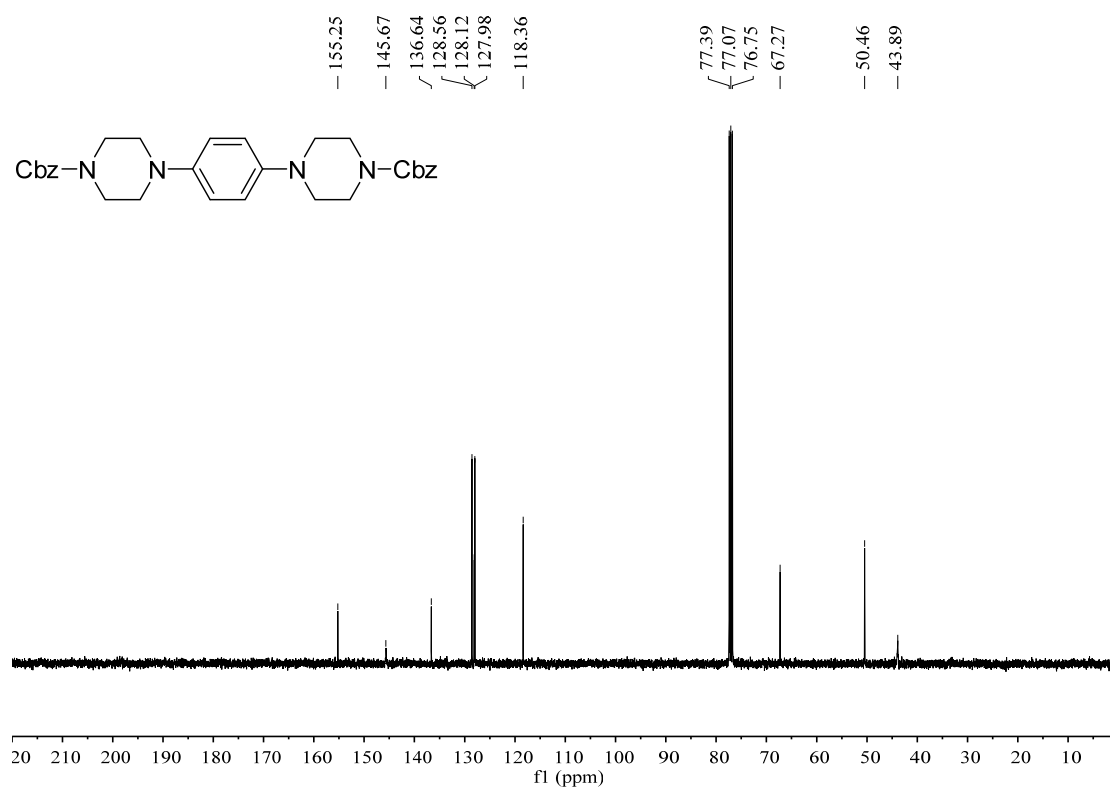

<sup>1</sup>H NMR spectra of **3j** (400 MHz, CDCl<sub>3</sub>)

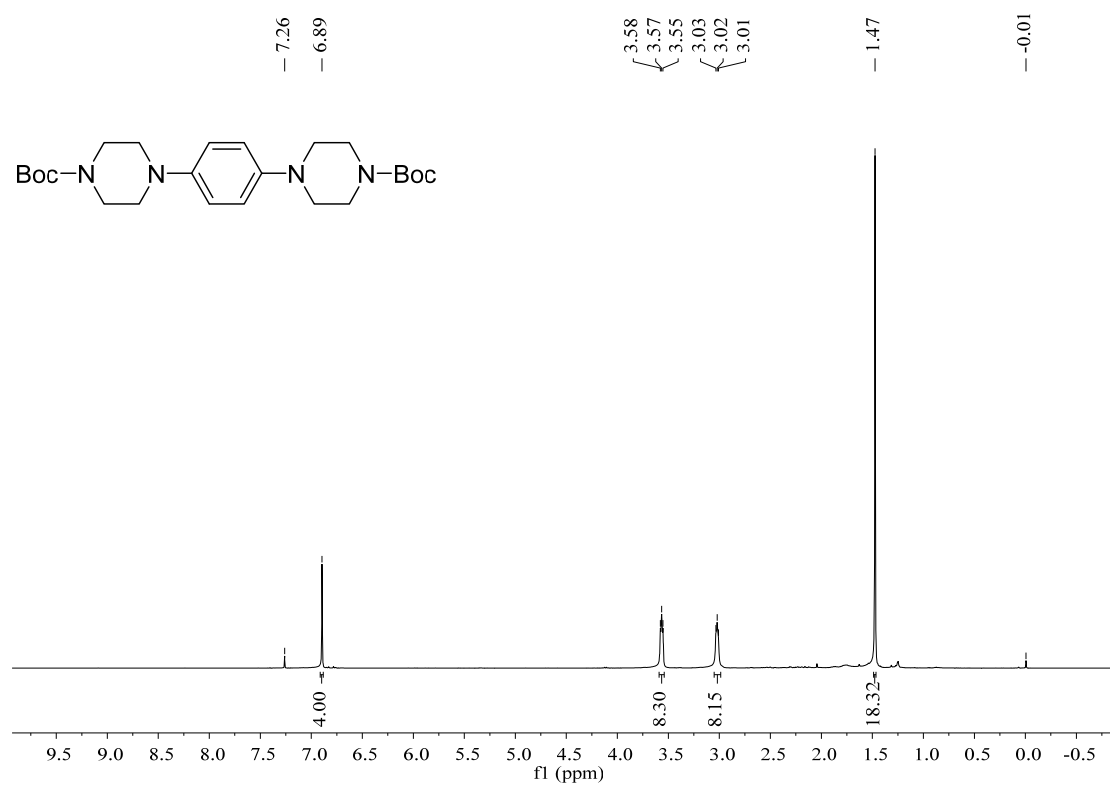

<sup>13</sup>C NMR spectra of **3j** (100 MHz, CDCl<sub>3</sub>)

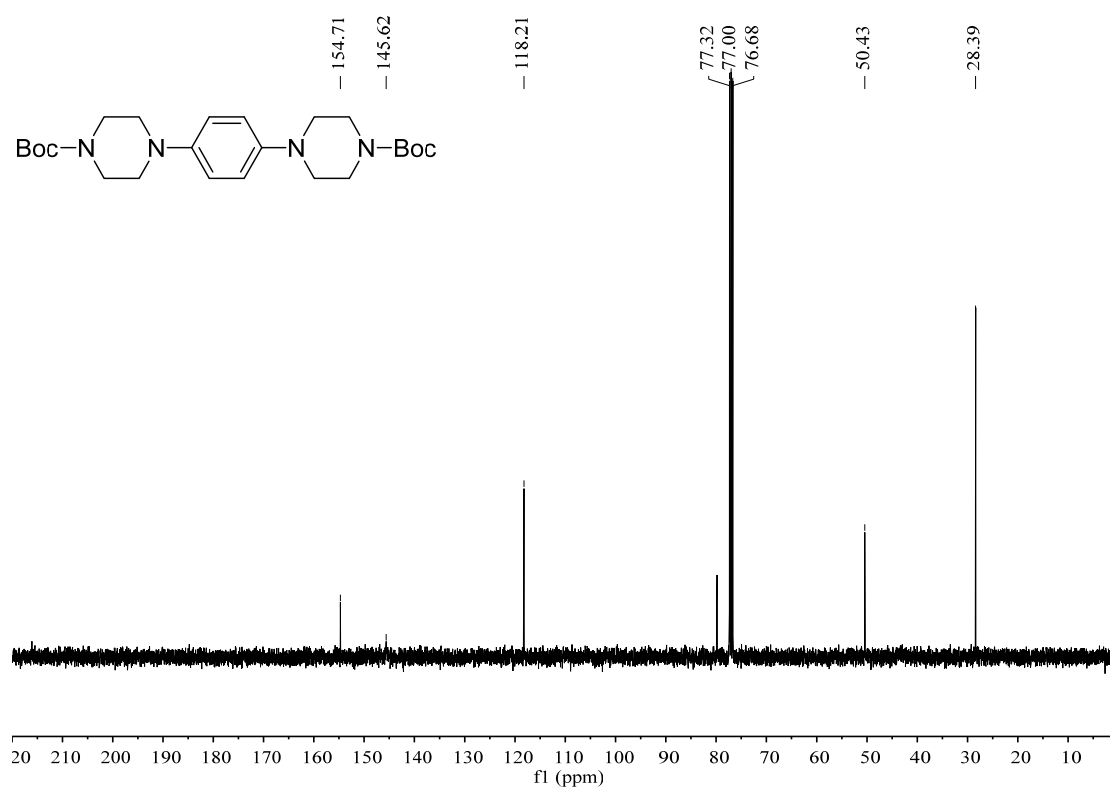

<sup>1</sup>H NMR spectra of **3k** (400 MHz, CDCl<sub>3</sub>)

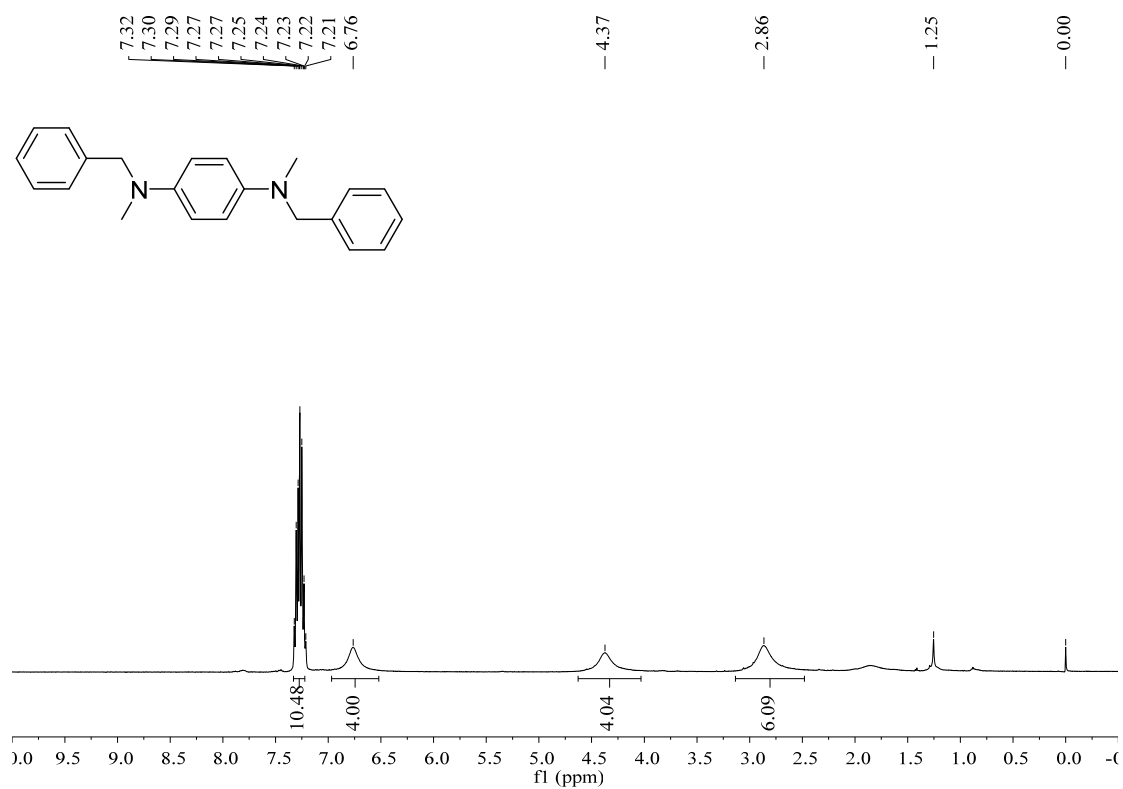

<sup>13</sup>C NMR spectra of **3k** (100 MHz, CDCl<sub>3</sub>)

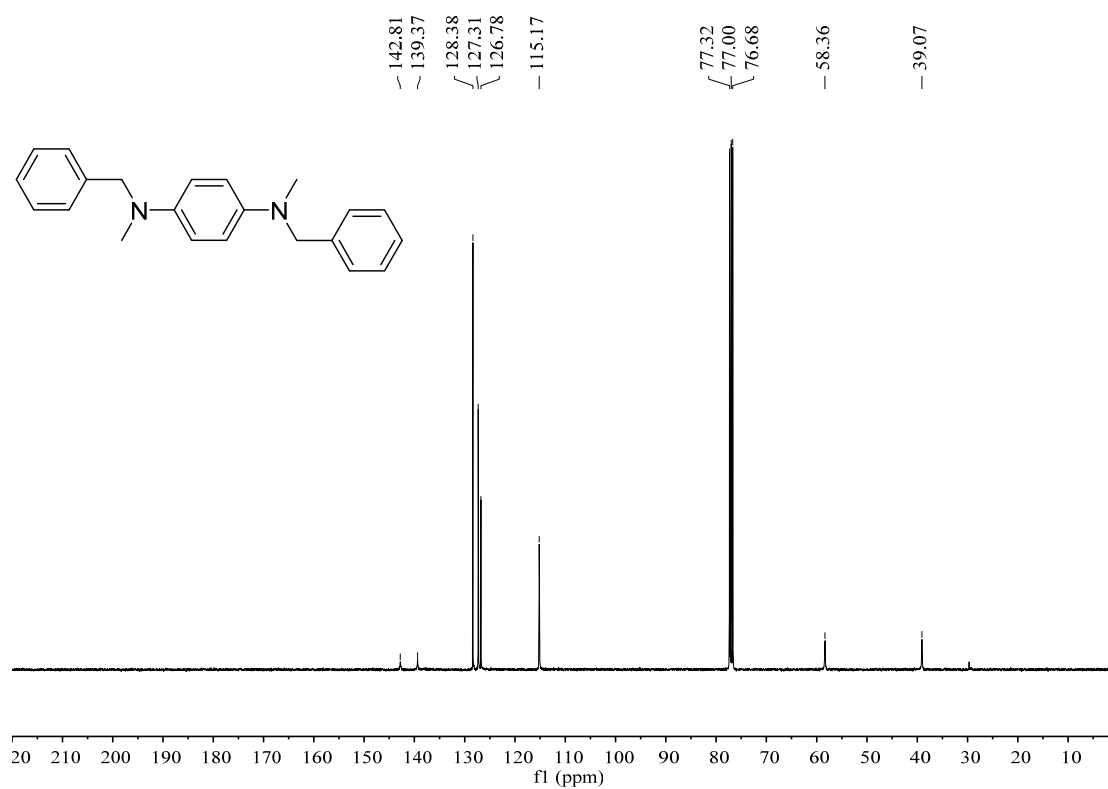

<sup>1</sup>H NMR spectra of **3l** (400 MHz, CDCl<sub>3</sub>)

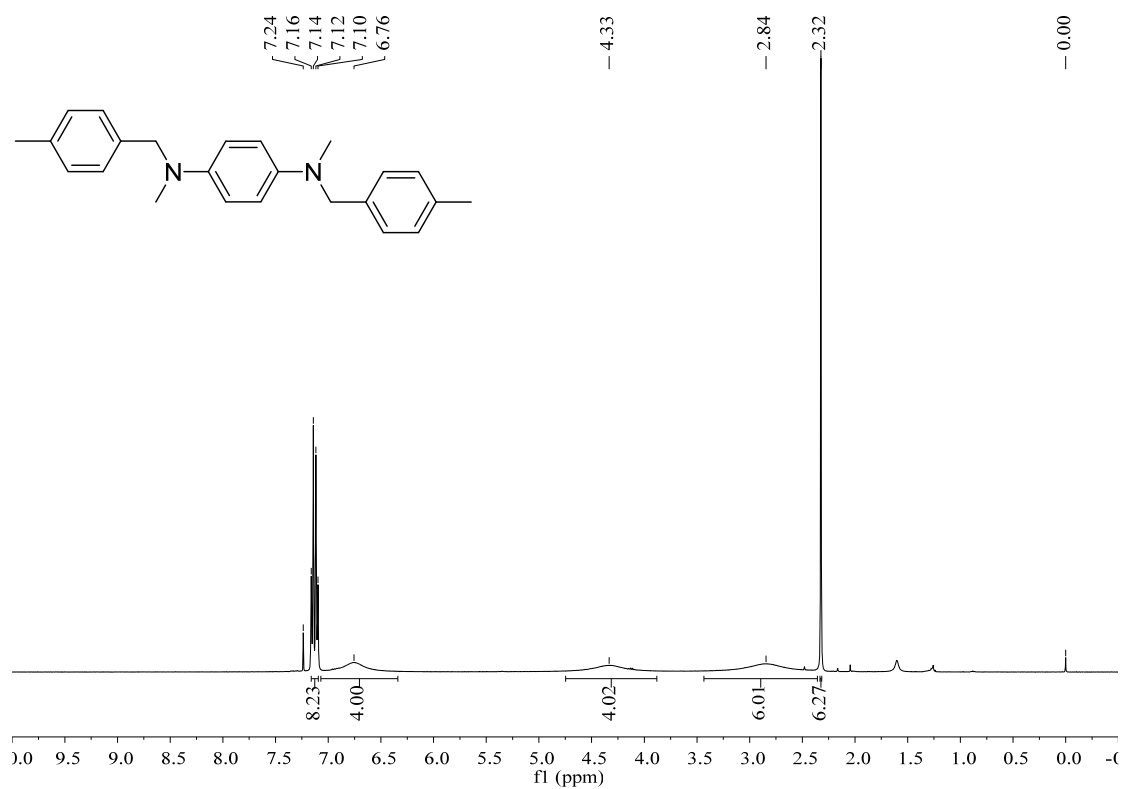



$^{13}\text{C}$  NMR spectra of **3l** (100 MHz,  $\text{CDCl}_3$ )

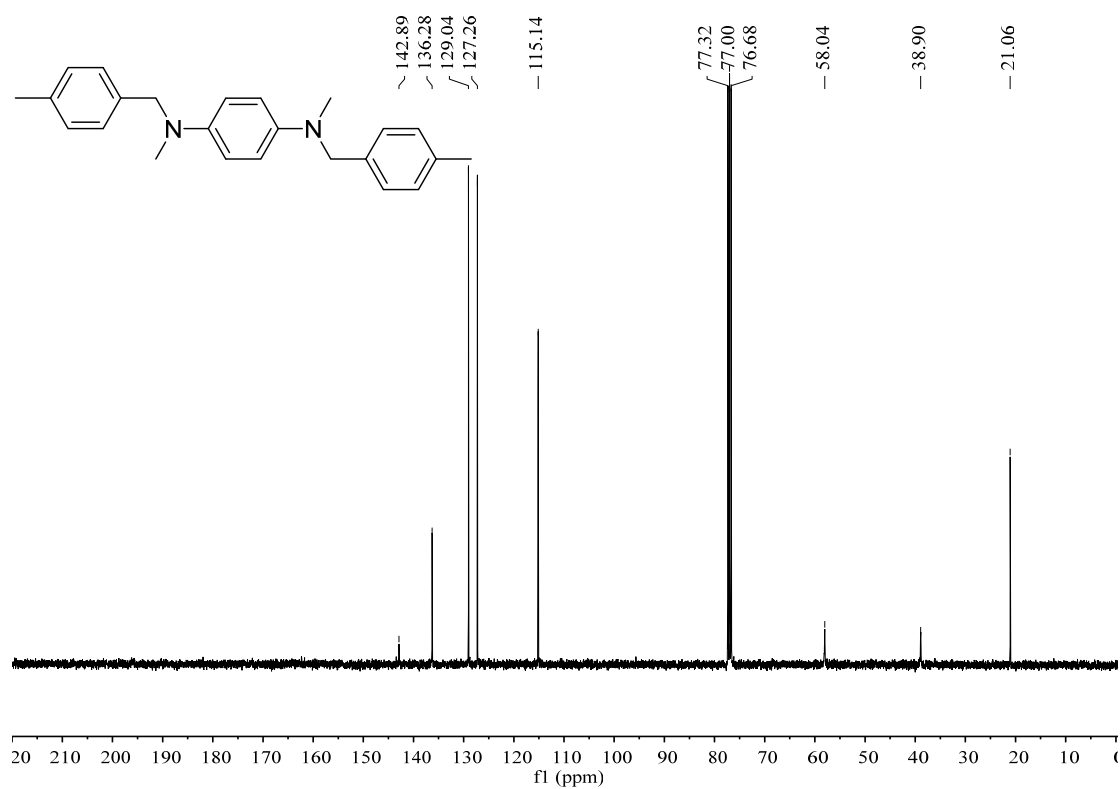

$^1\text{H}$  NMR spectra of **3m** (400 MHz,  $\text{CDCl}_3$ )

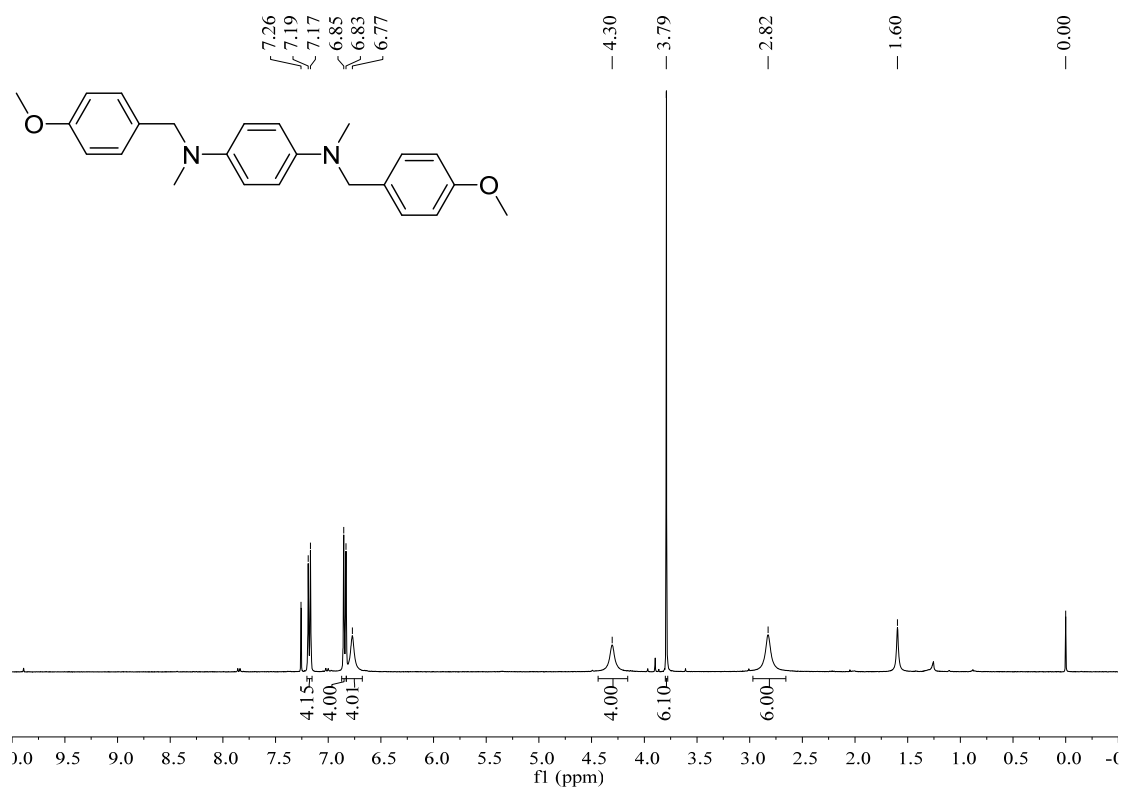

$^{13}\text{C}$  NMR spectra of **3m** (100 MHz,  $\text{CDCl}_3$ )

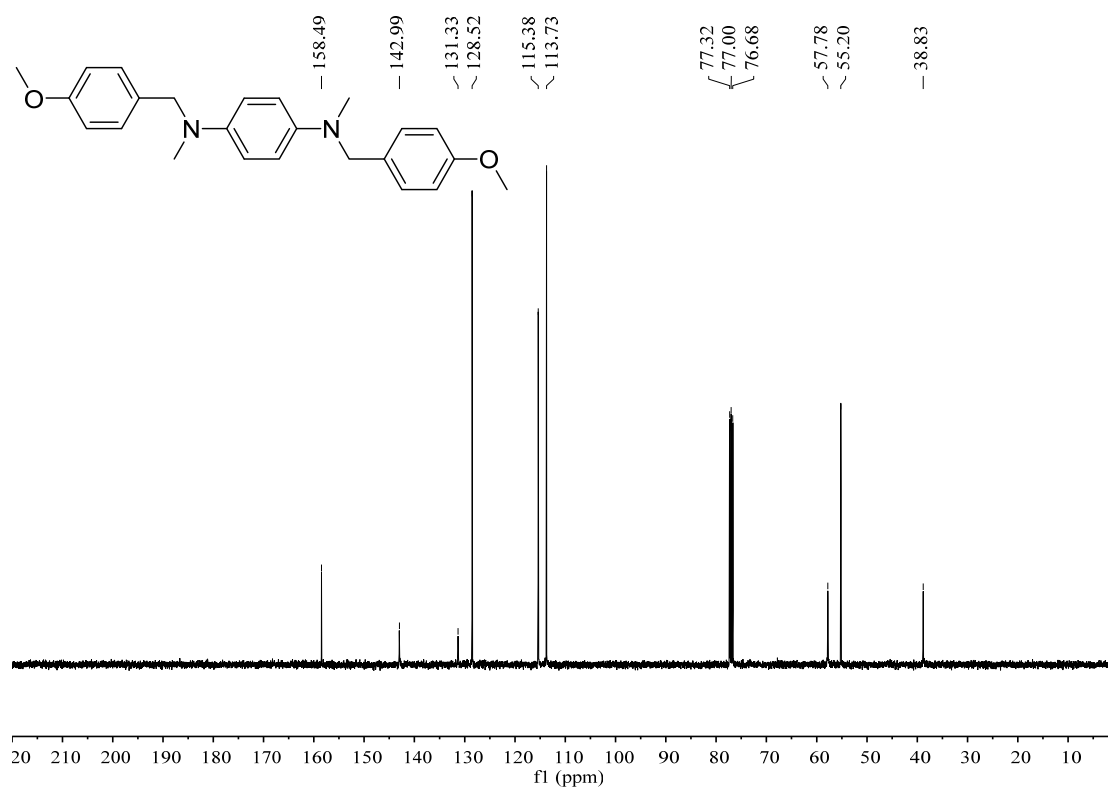

$^1\text{H}$  NMR spectra of **3n** (400 MHz,  $\text{CDCl}_3$ )

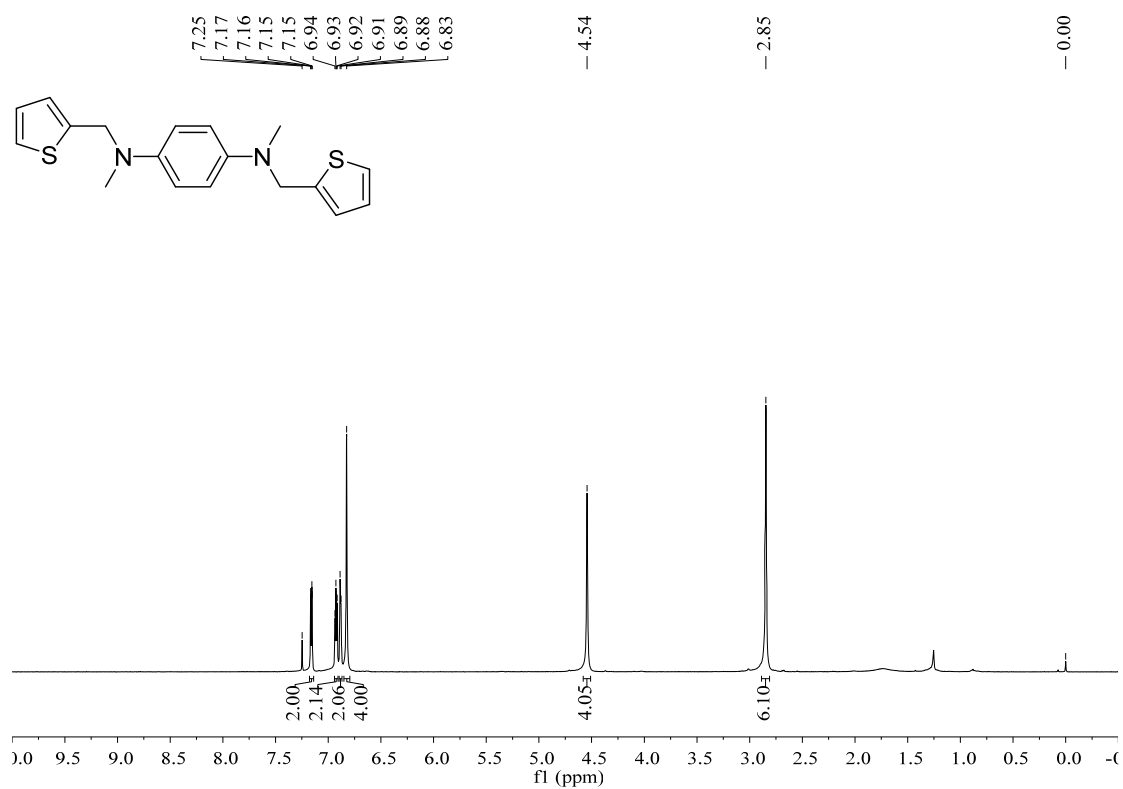

<sup>13</sup>C NMR spectra of **3n** (100 MHz, CDCl<sub>3</sub>)

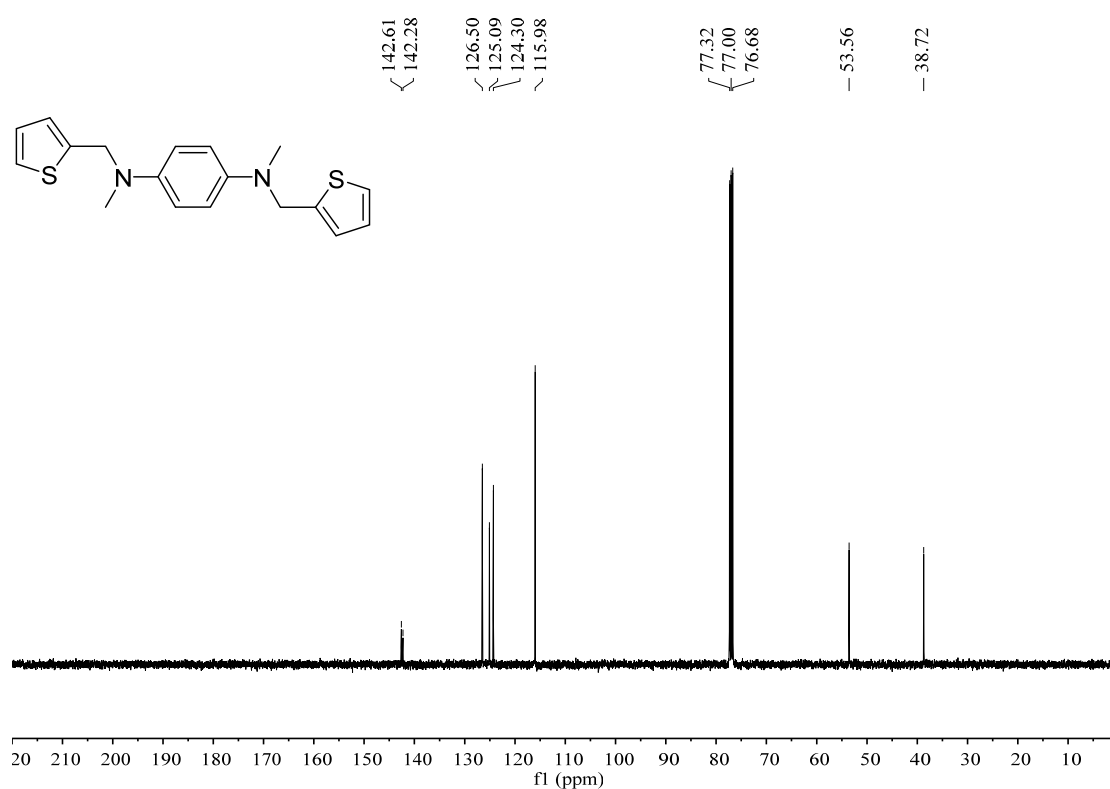

<sup>1</sup>H NMR spectra of **3o** (400 MHz, CDCl<sub>3</sub>)

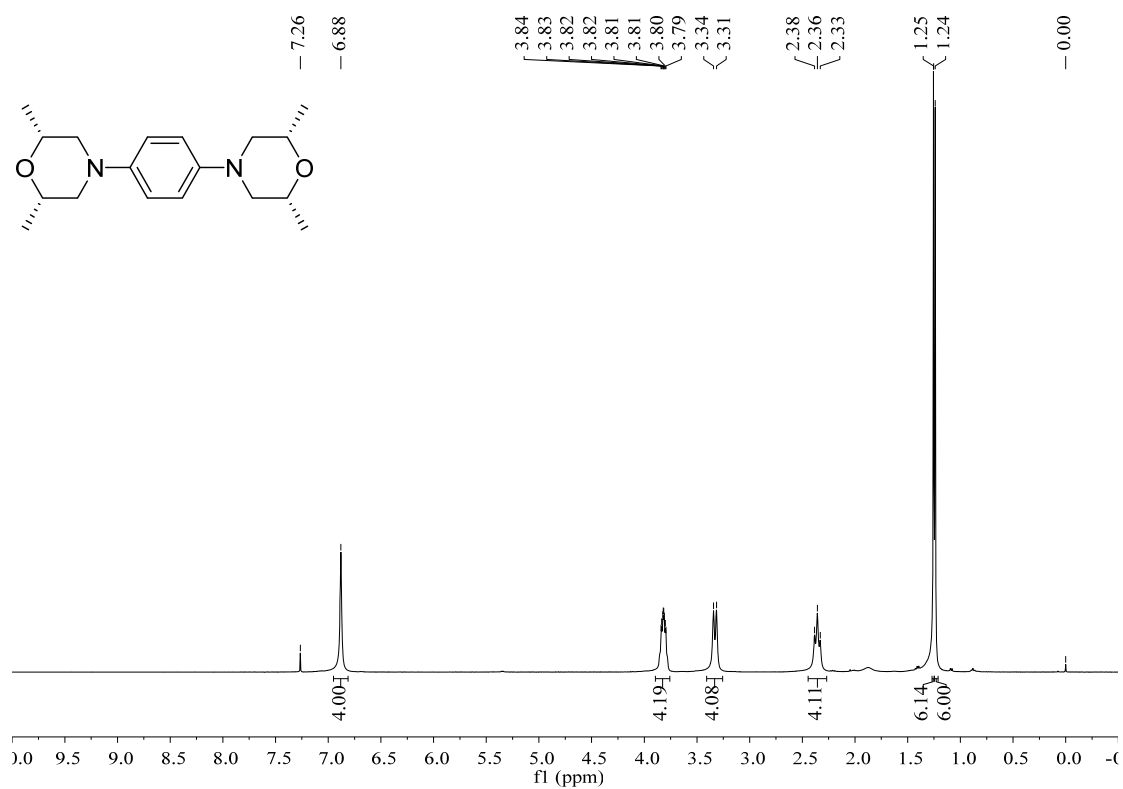

<sup>13</sup>C NMR spectra of **3n** (100 MHz, CDCl<sub>3</sub>)

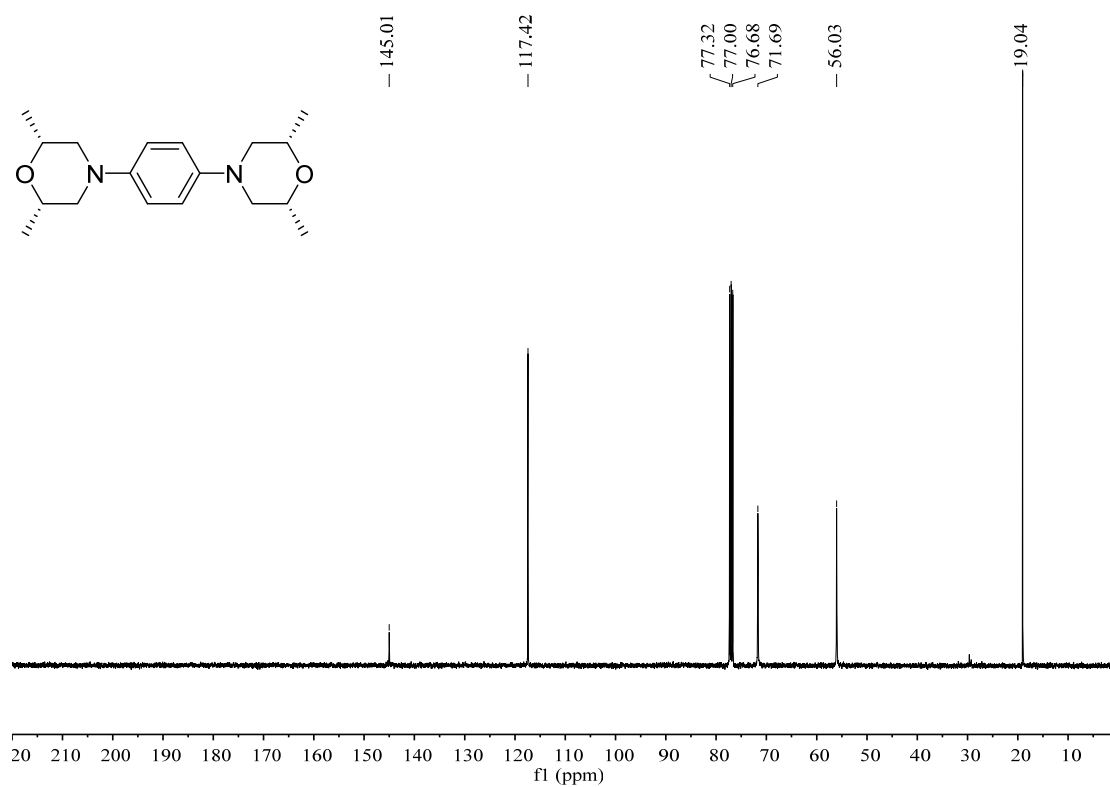

<sup>1</sup>H NMR spectra of **3p** (400 MHz, CDCl<sub>3</sub>)

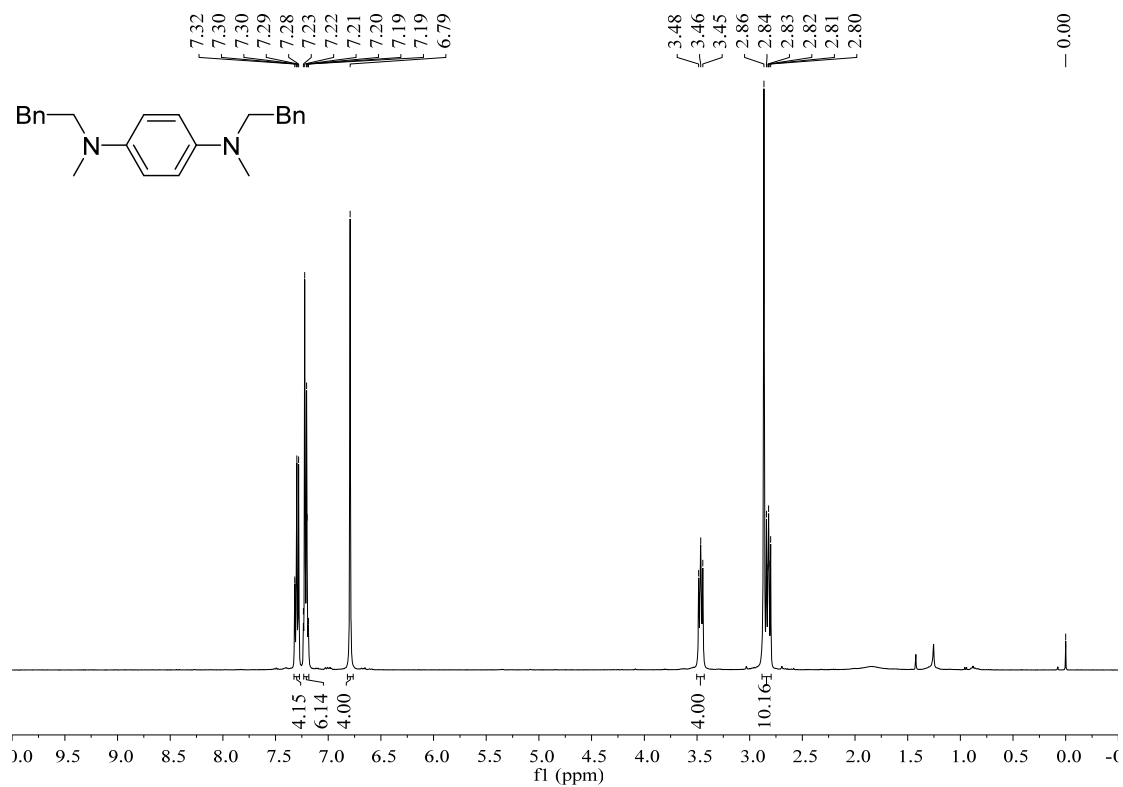

$^{13}\text{C}$  NMR spectra of **3p** (100 MHz,  $\text{CDCl}_3$ )

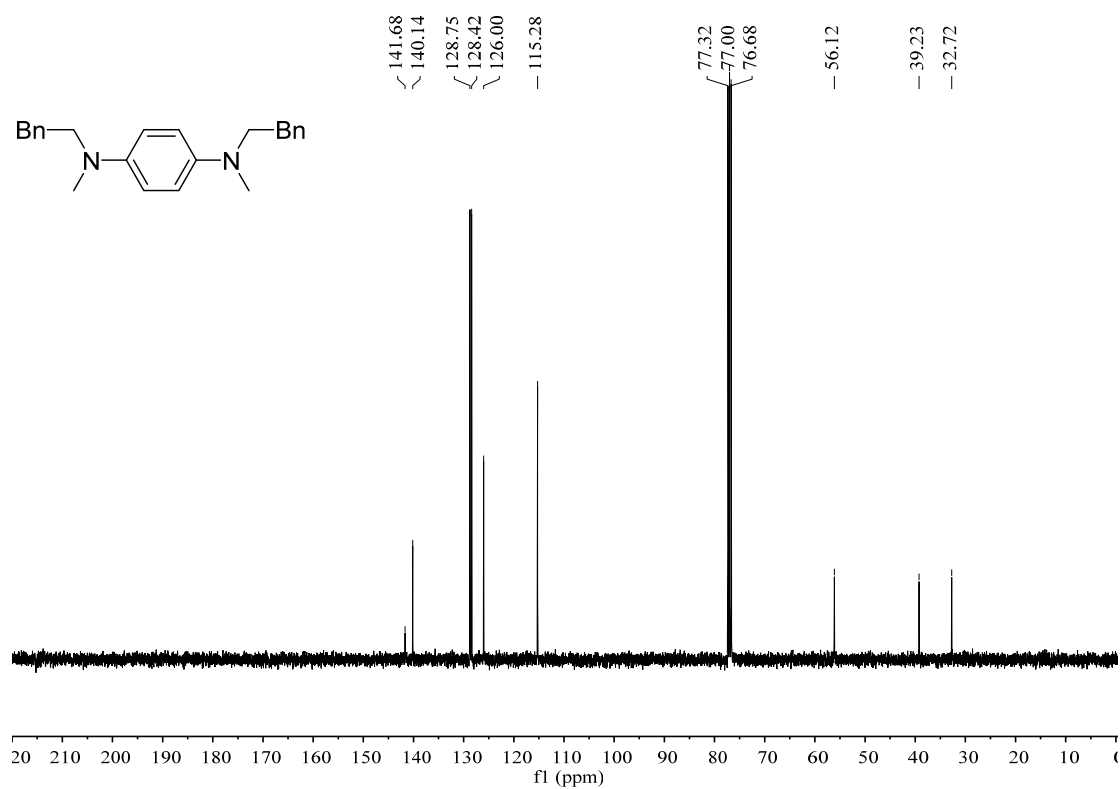

$^1\text{H}$  NMR spectra of **3q** (400 MHz,  $\text{CDCl}_3$ )

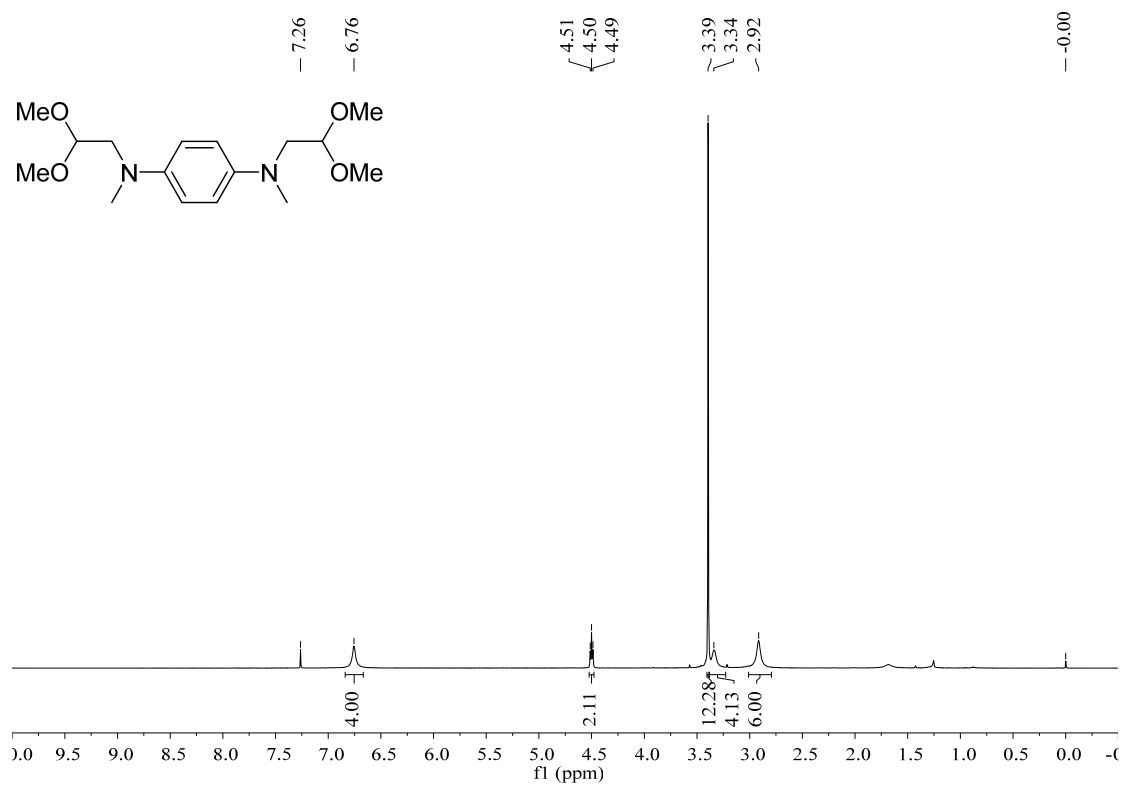

<sup>13</sup>C NMR spectra of **3q** (100 MHz, CDCl<sub>3</sub>)

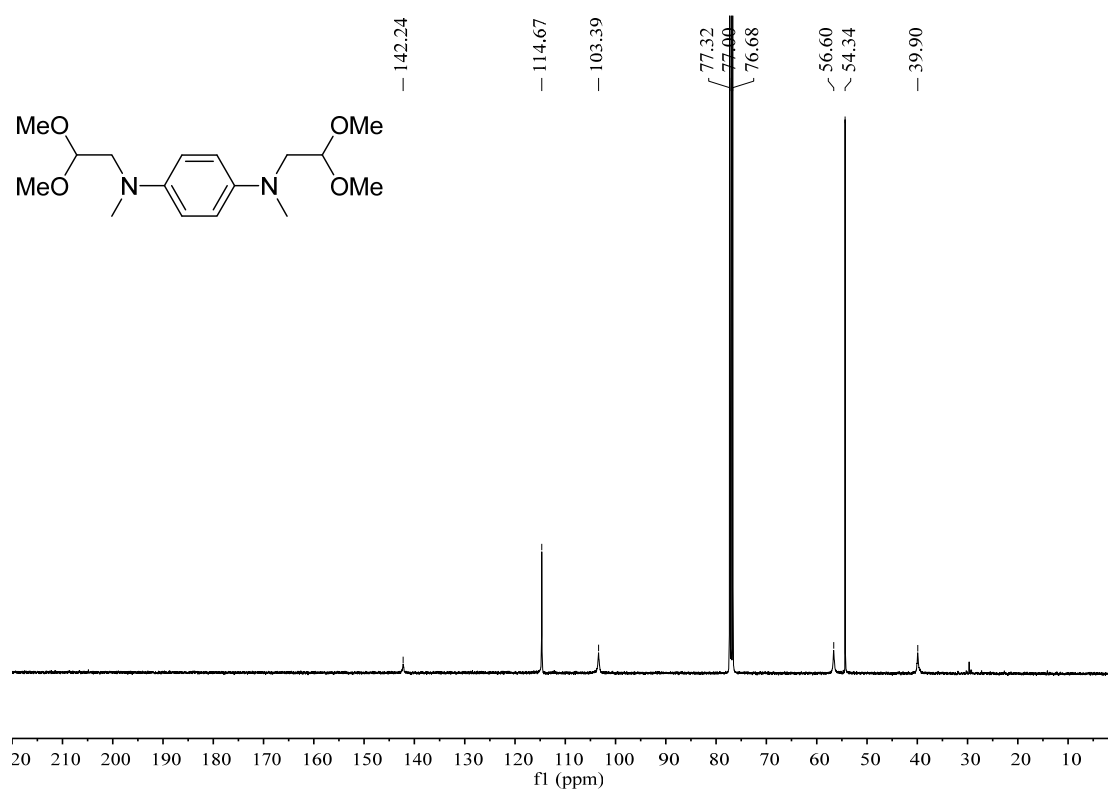

<sup>1</sup>H NMR spectra of **3r** (400 MHz, CDCl<sub>3</sub>)

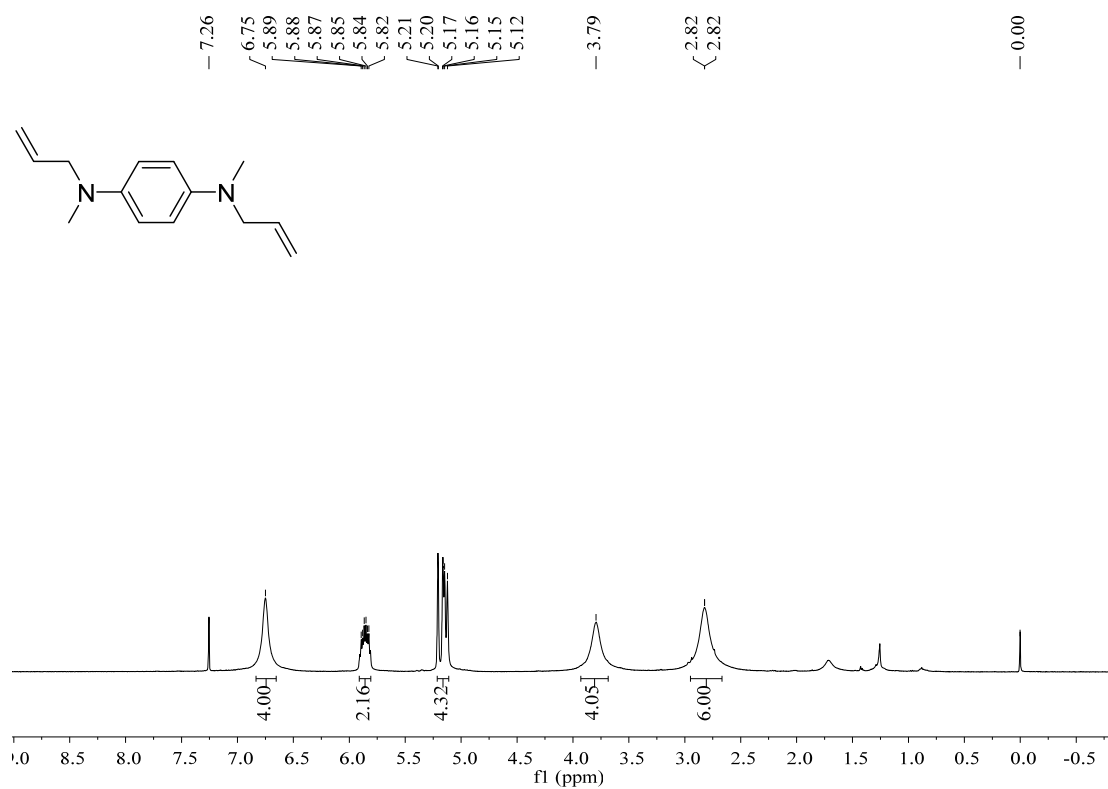

<sup>13</sup>C NMR spectra of **3r** (100 MHz, CDCl<sub>3</sub>)

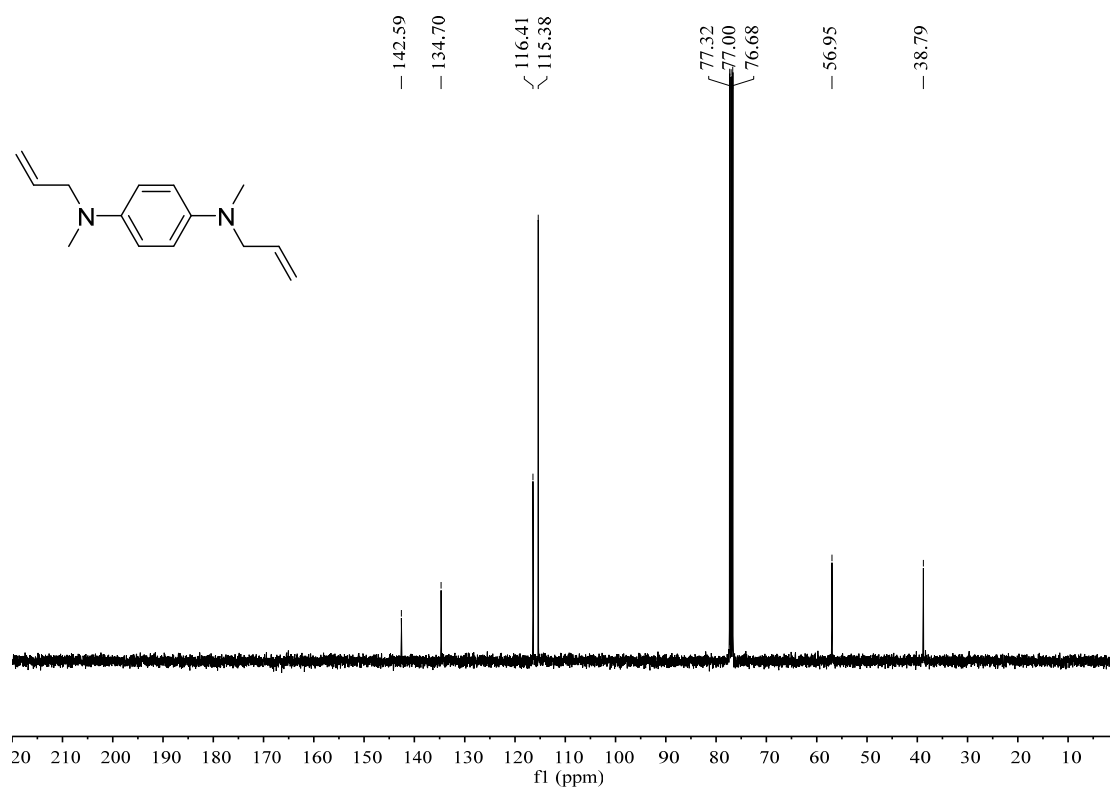

<sup>1</sup>H NMR spectra of **3s** (400 MHz, CDCl<sub>3</sub>)

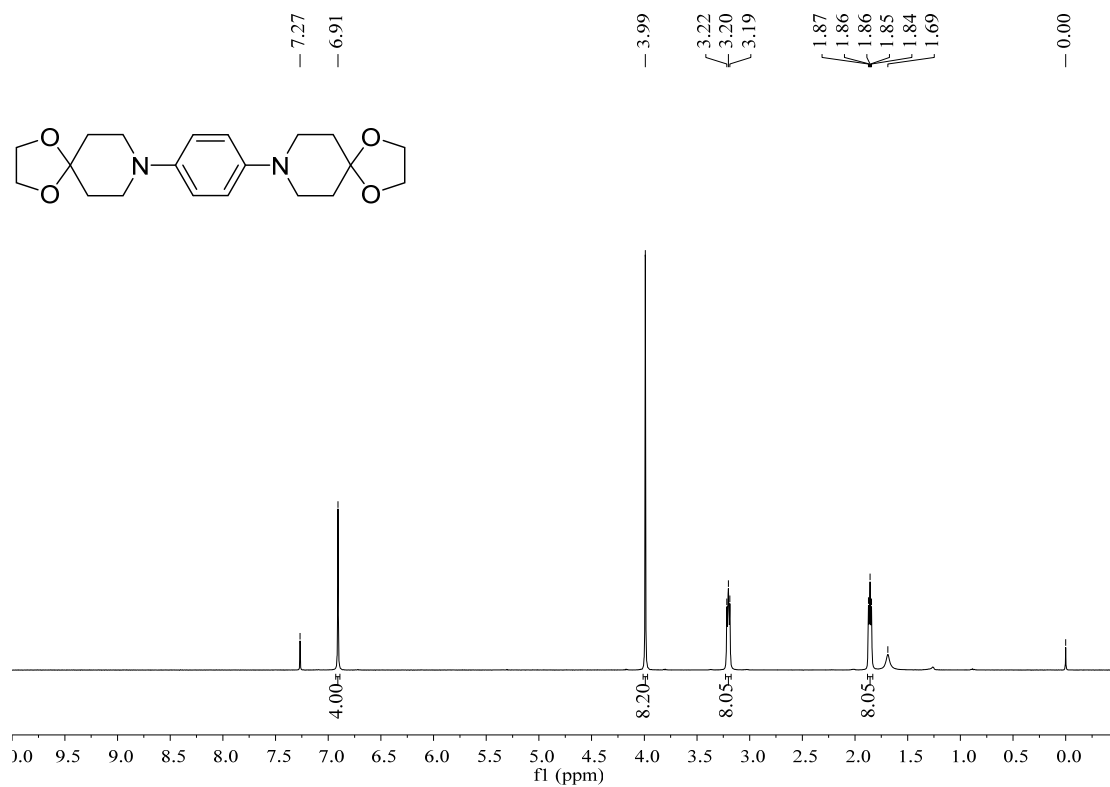

<sup>13</sup>C NMR spectra of **3s** (100 MHz, CDCl<sub>3</sub>)

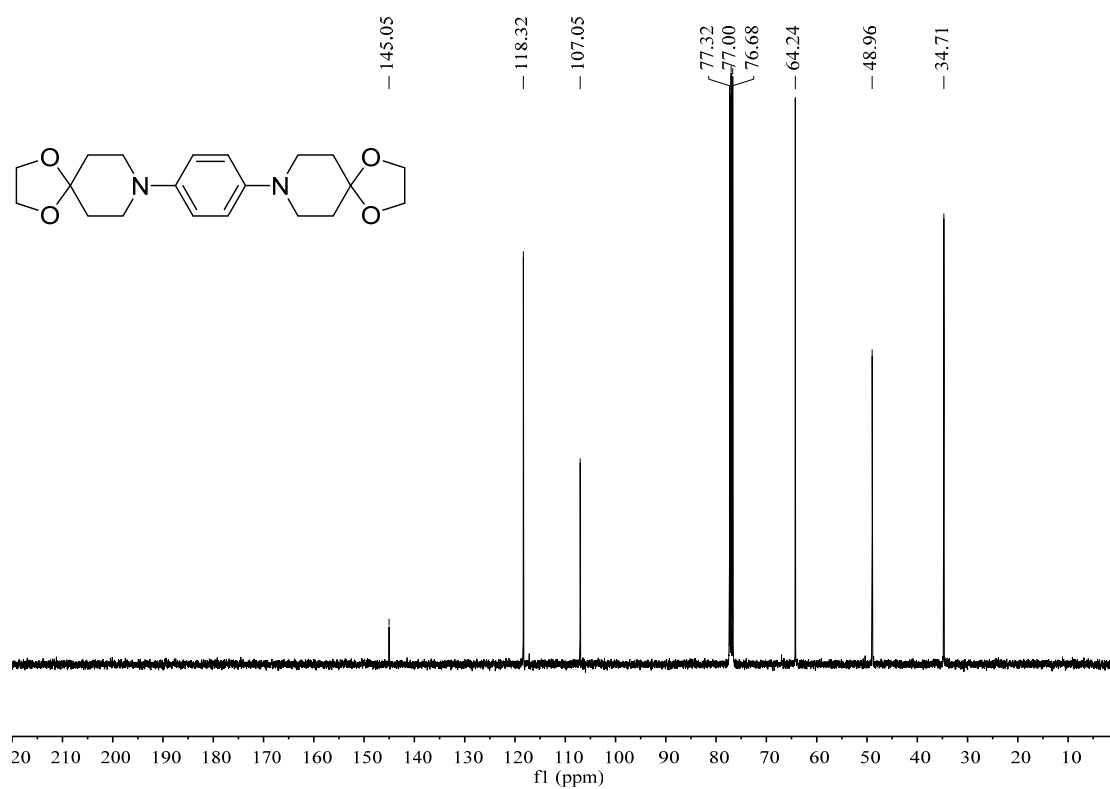

<sup>1</sup>H NMR spectra of **4a** (400 MHz, CDCl<sub>3</sub>)

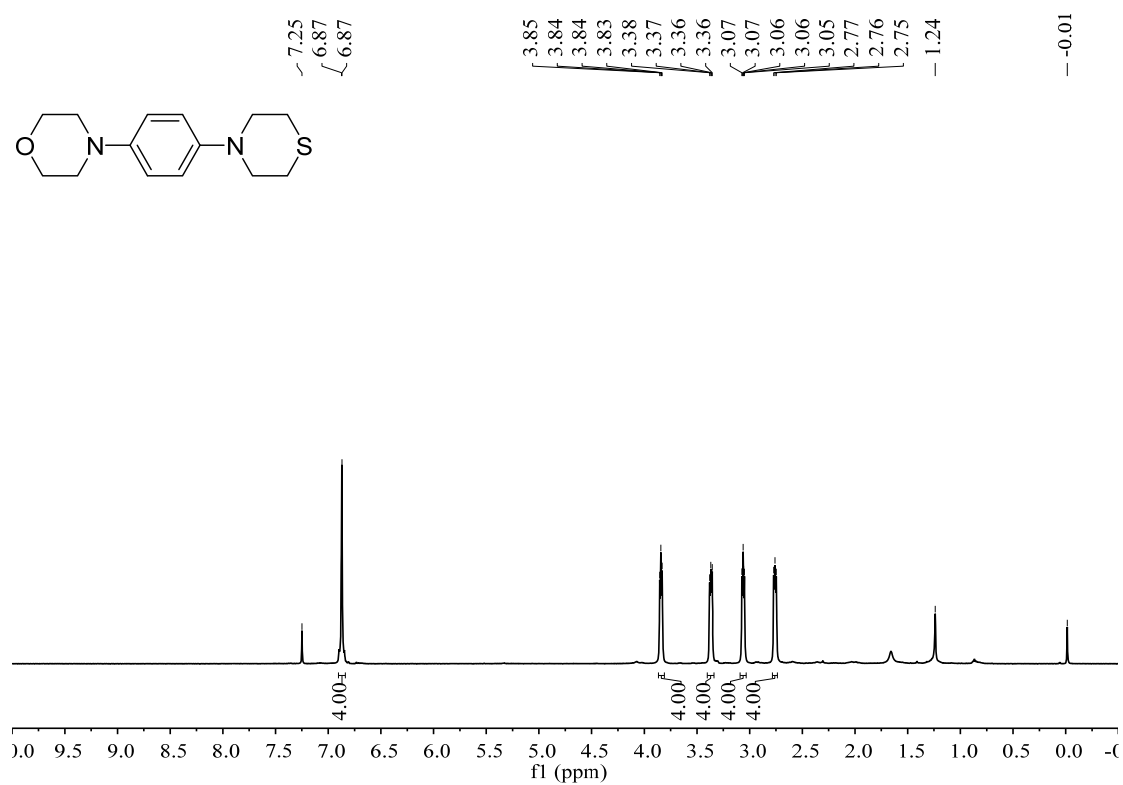



<sup>13</sup>C NMR spectra of **4a** (100 MHz, CDCl<sub>3</sub>)

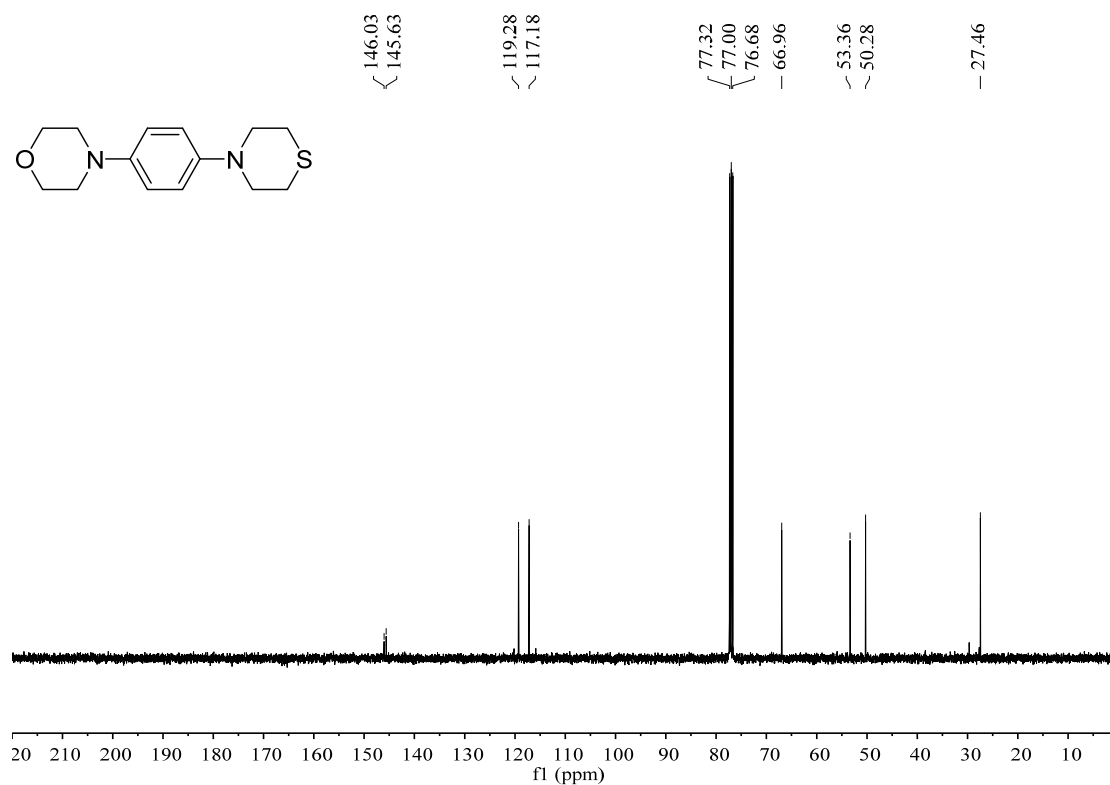

<sup>1</sup>H NMR spectra of **4b** (400 MHz, CDCl<sub>3</sub>)

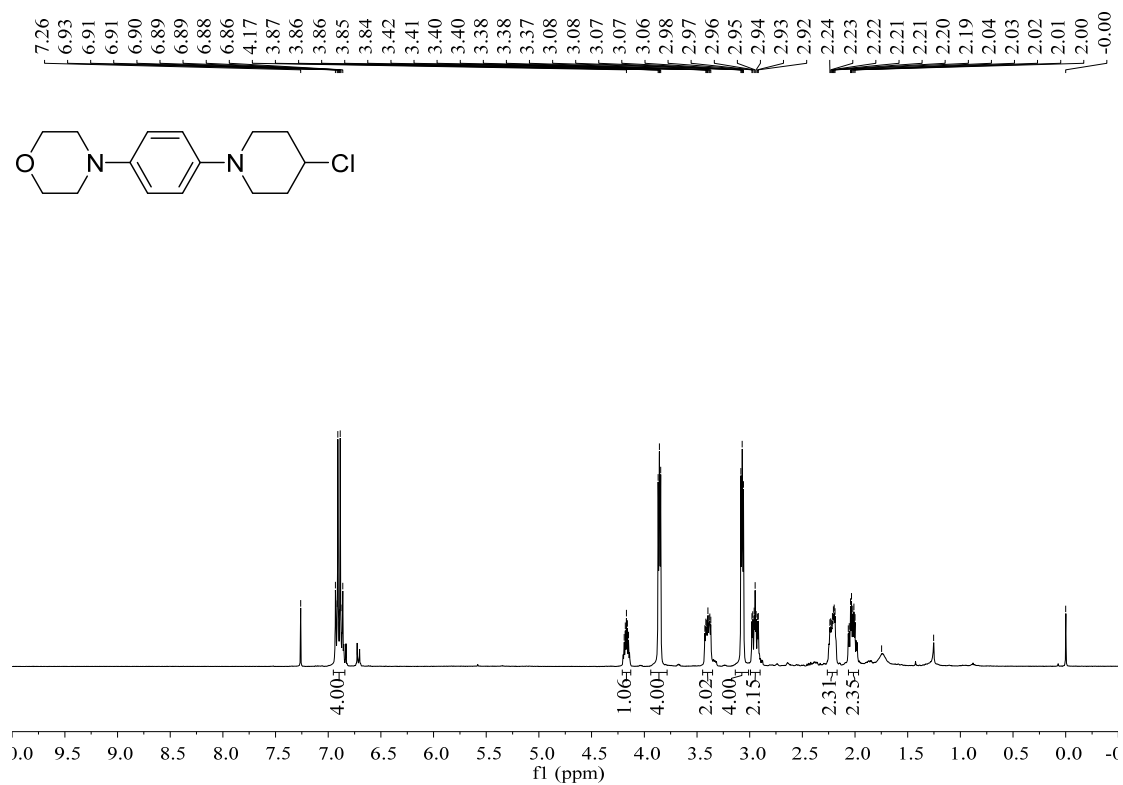

<sup>13</sup>C NMR spectra of **4c** (100 MHz, CDCl<sub>3</sub>)

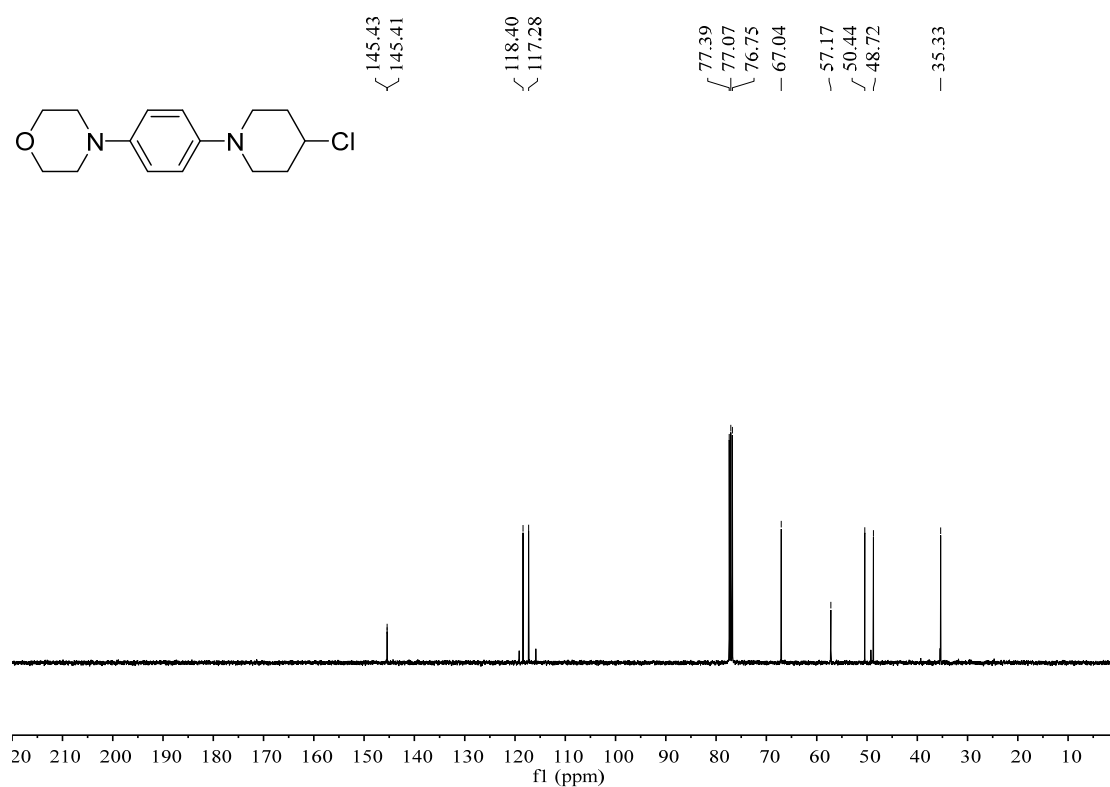

<sup>1</sup>H NMR spectra of **4c** (400 MHz, CDCl<sub>3</sub>)

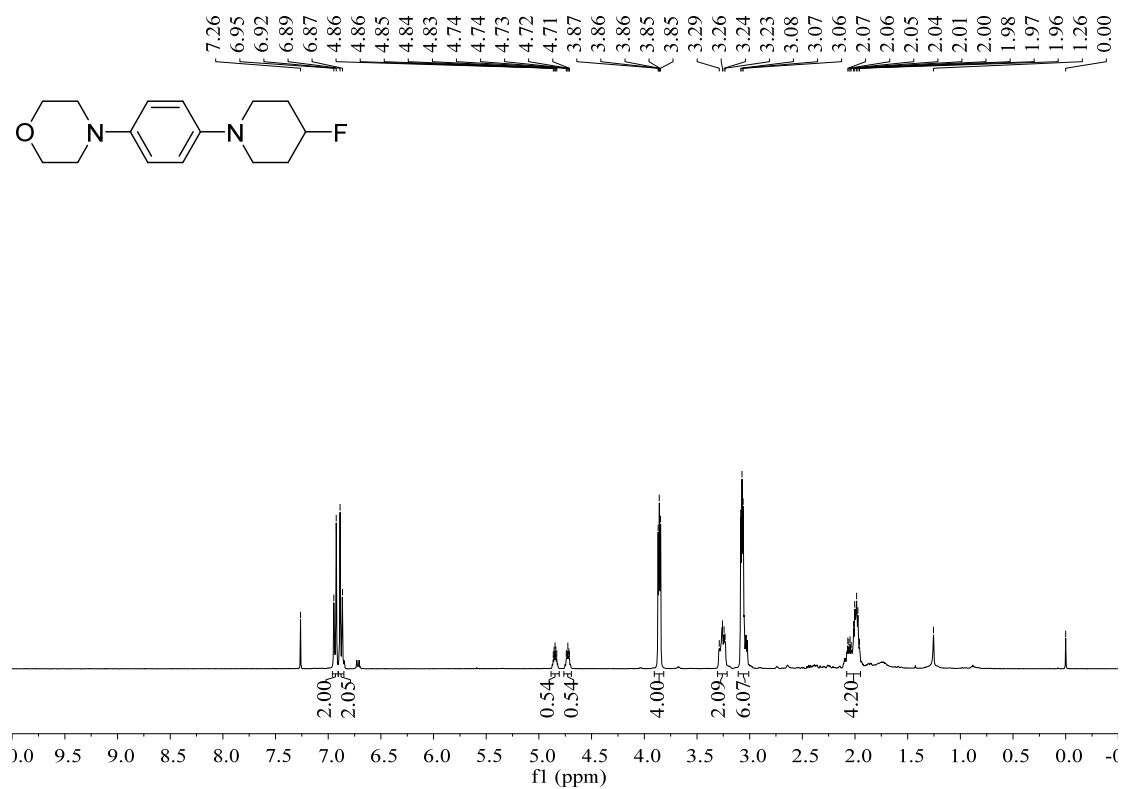

<sup>13</sup>C NMR spectra of **4c** (100 MHz, CDCl<sub>3</sub>)

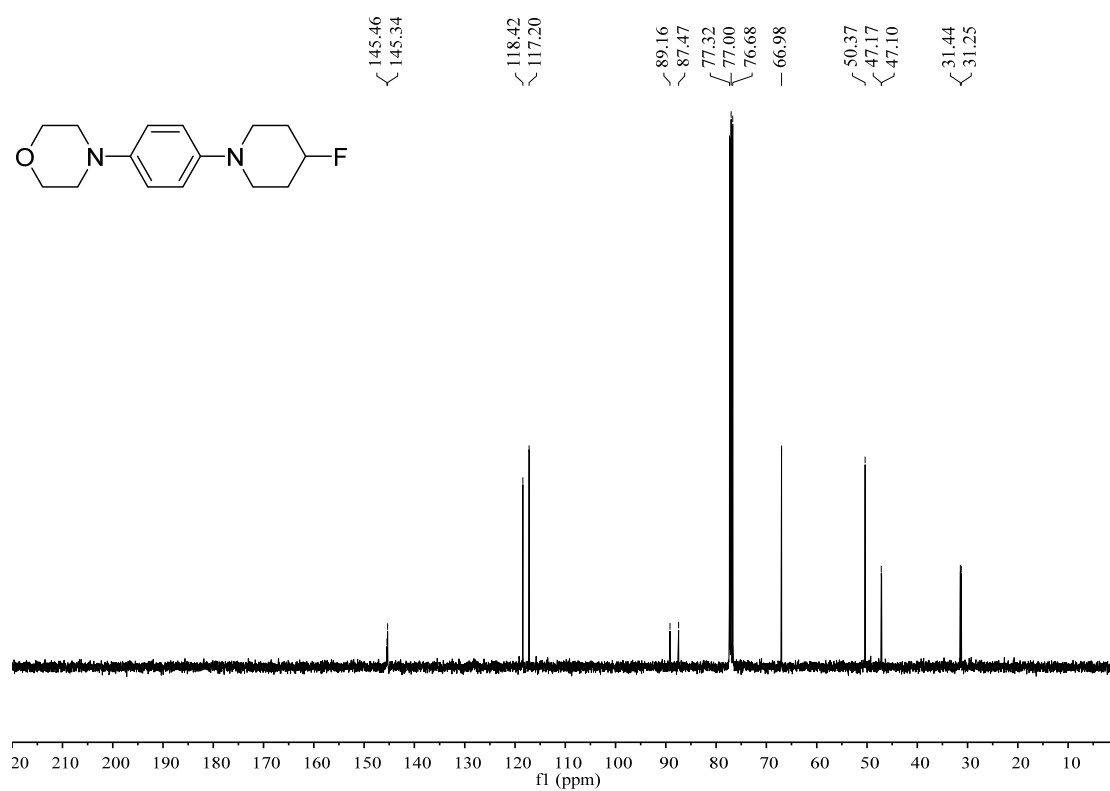

<sup>19</sup>F NMR spectra of **4c** (376 MHz, CDCl<sub>3</sub>)

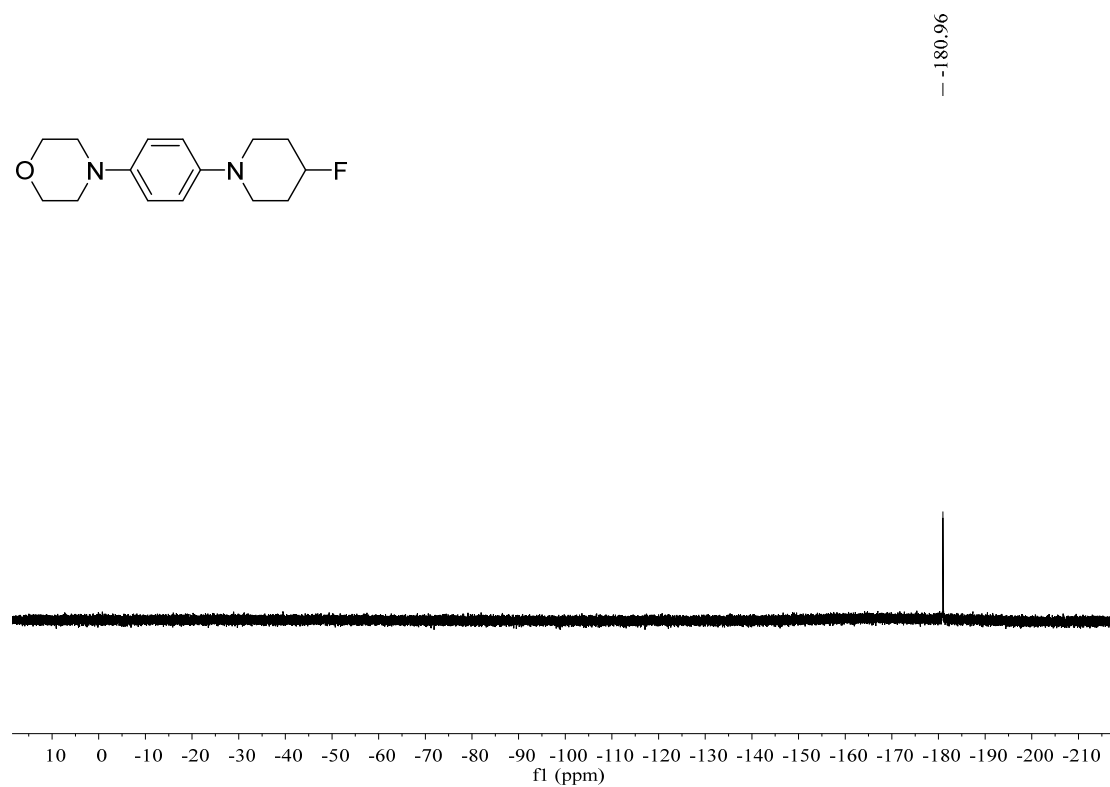

<sup>1</sup>H NMR spectra of **4d** (400 MHz, CDCl<sub>3</sub>)

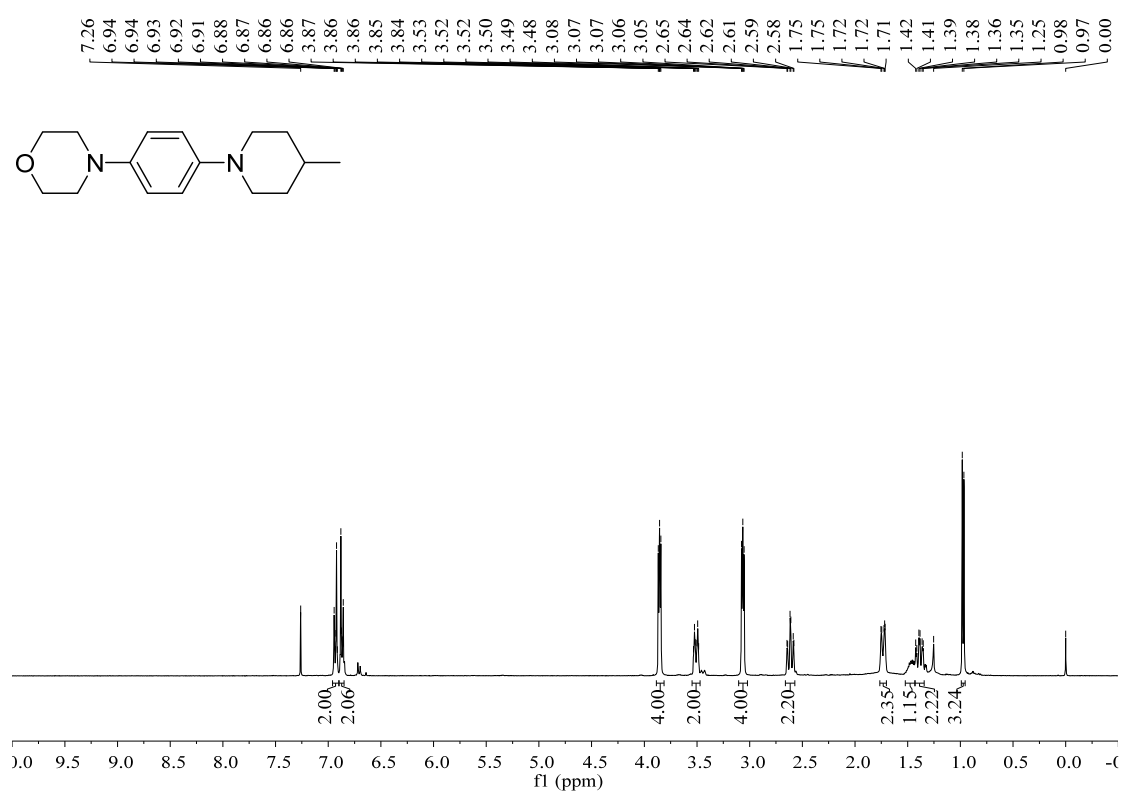

<sup>13</sup>C NMR spectra of **4d** (100 MHz, CDCl<sub>3</sub>)

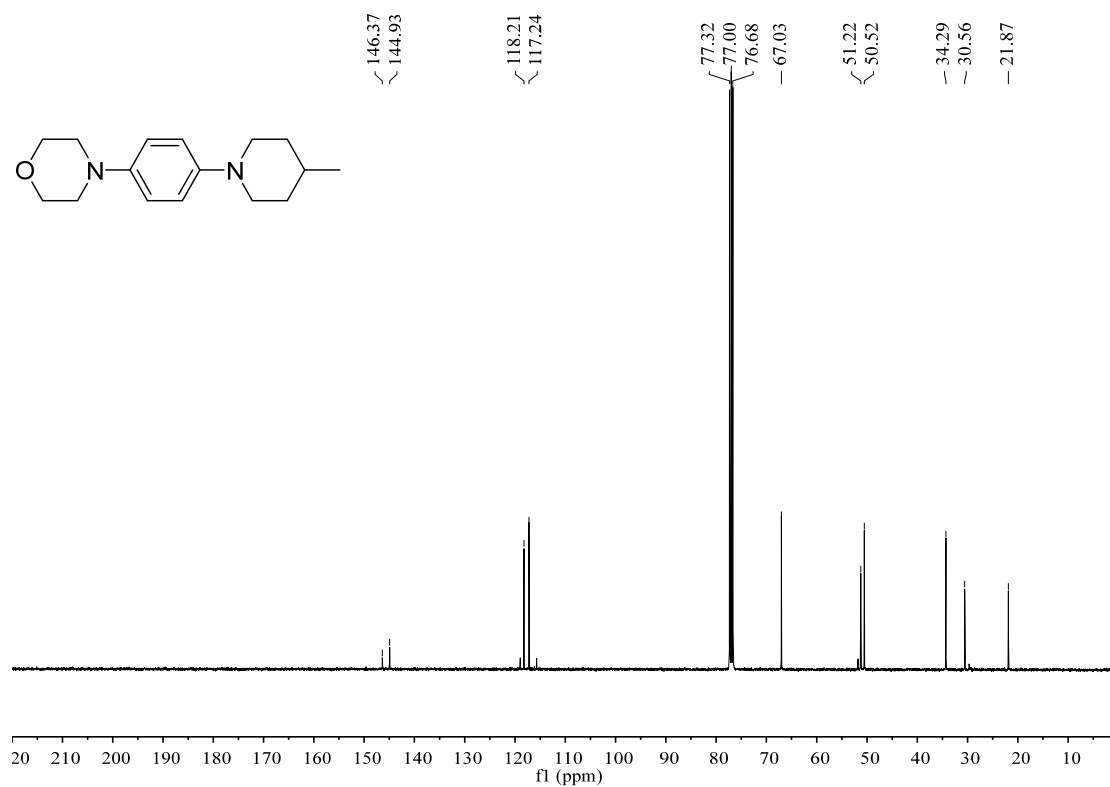

<sup>1</sup>H NMR spectra of **4e** (400 MHz, CDCl<sub>3</sub>)

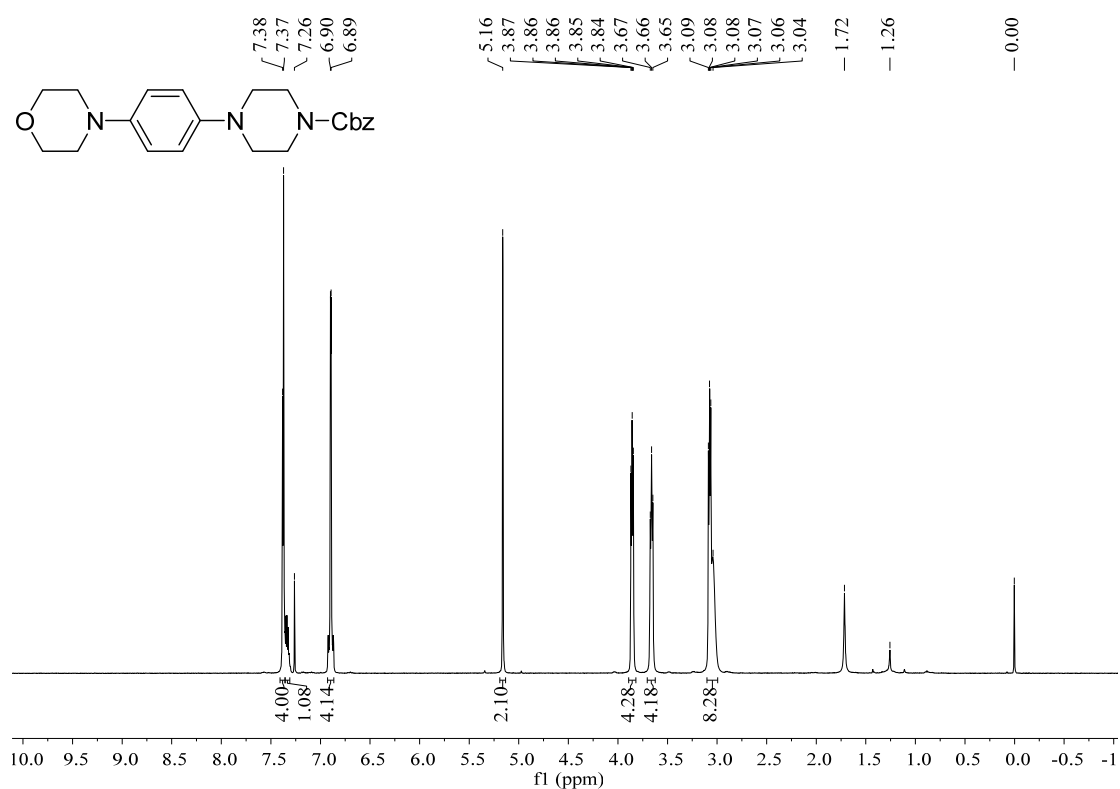

<sup>13</sup>C NMR spectra of **4e** (100 MHz, CDCl<sub>3</sub>)

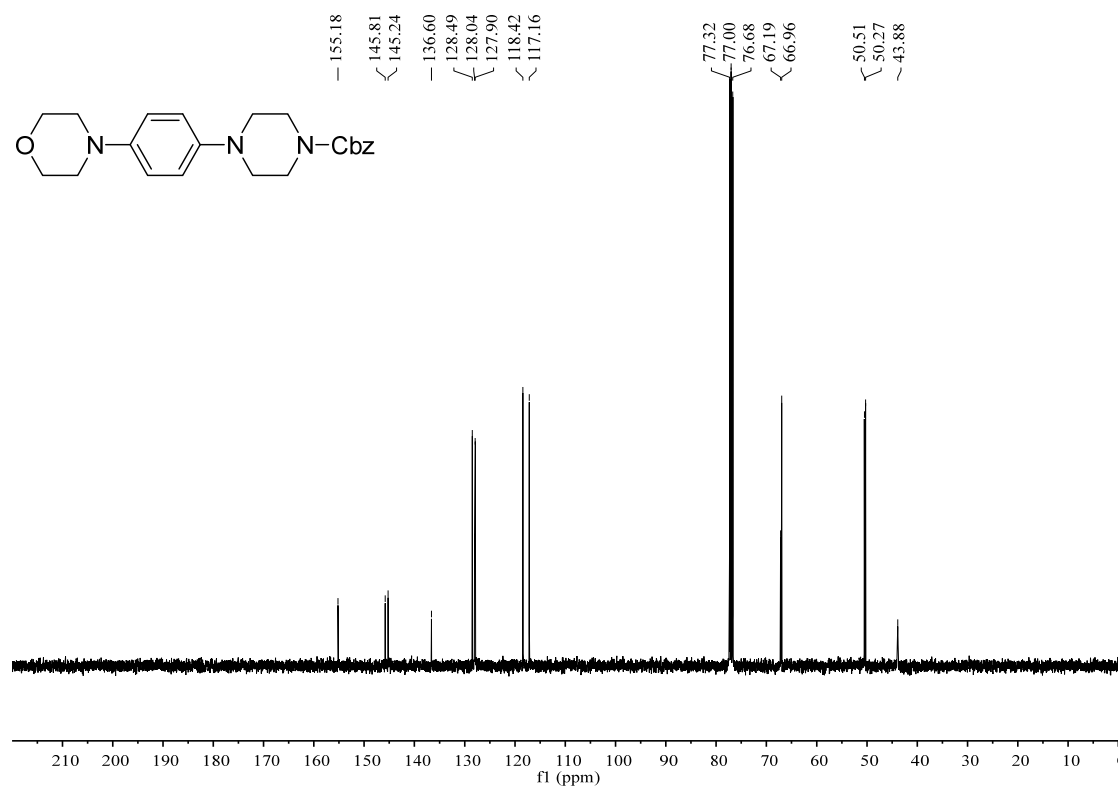

<sup>1</sup>H NMR spectra of **4f** (400 MHz, CDCl<sub>3</sub>)

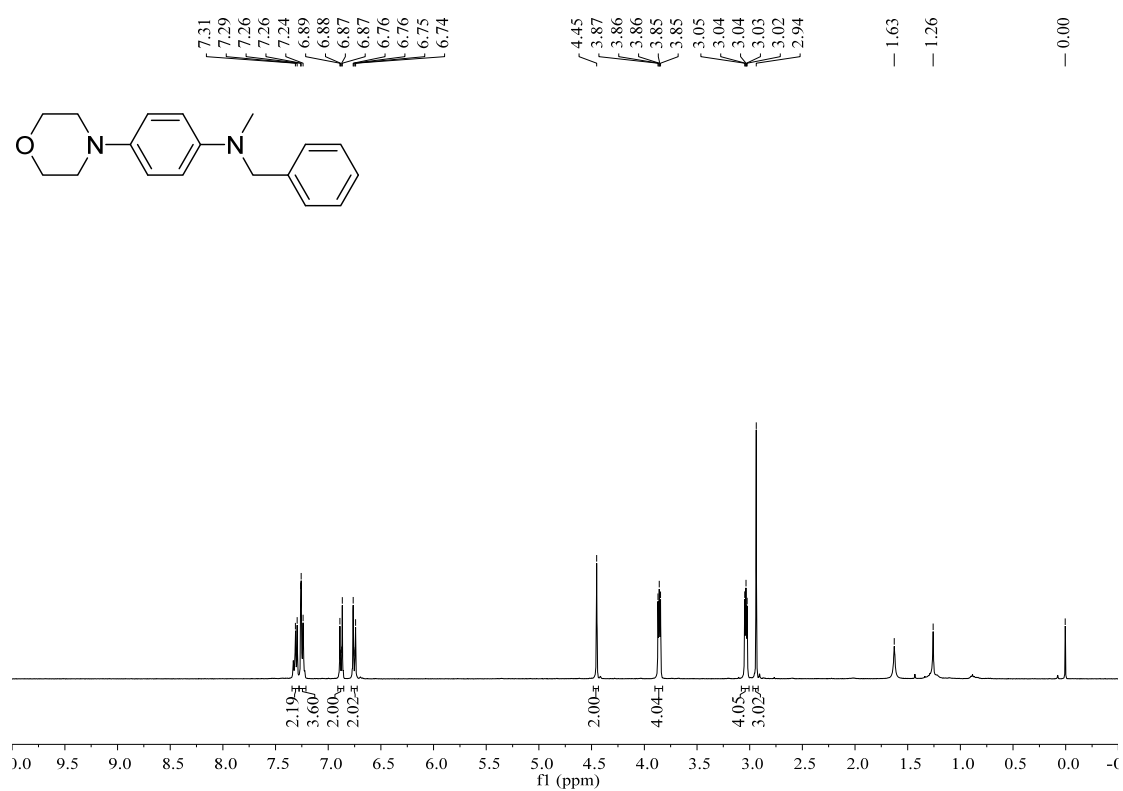

<sup>13</sup>C NMR spectra of **4f** (100 MHz, CDCl<sub>3</sub>)

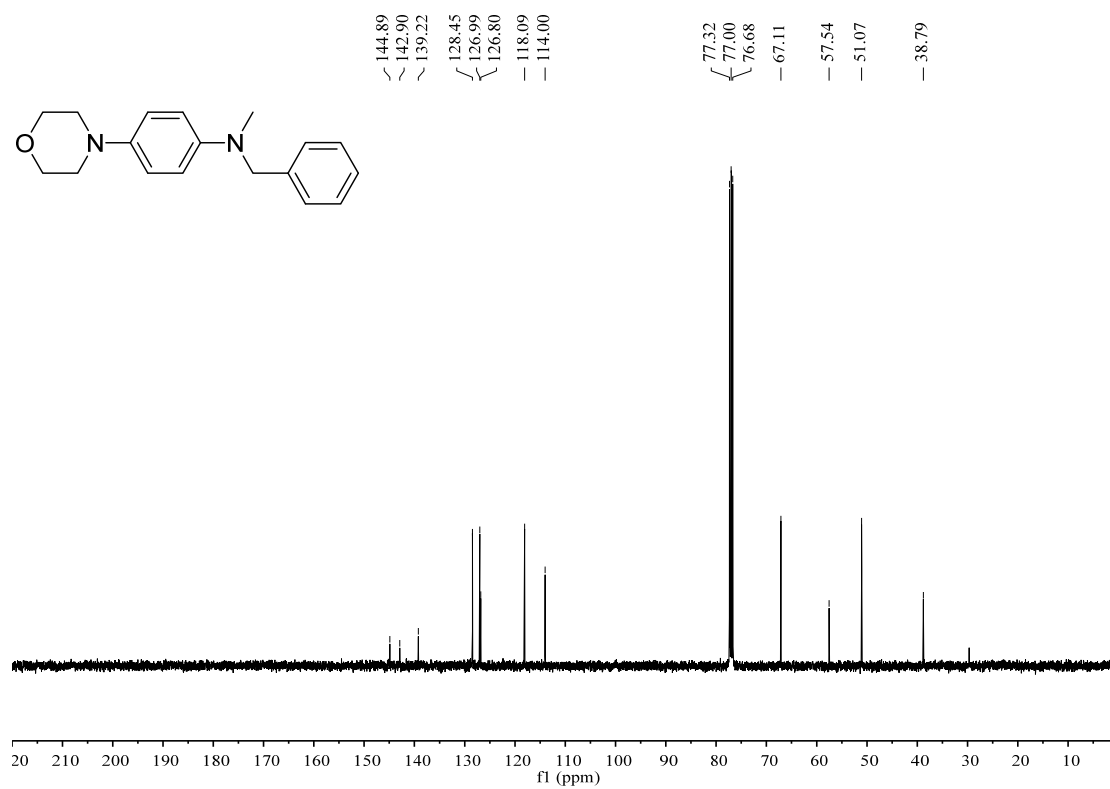

<sup>1</sup>H NMR spectra of **4g** (400 MHz, CDCl<sub>3</sub>)

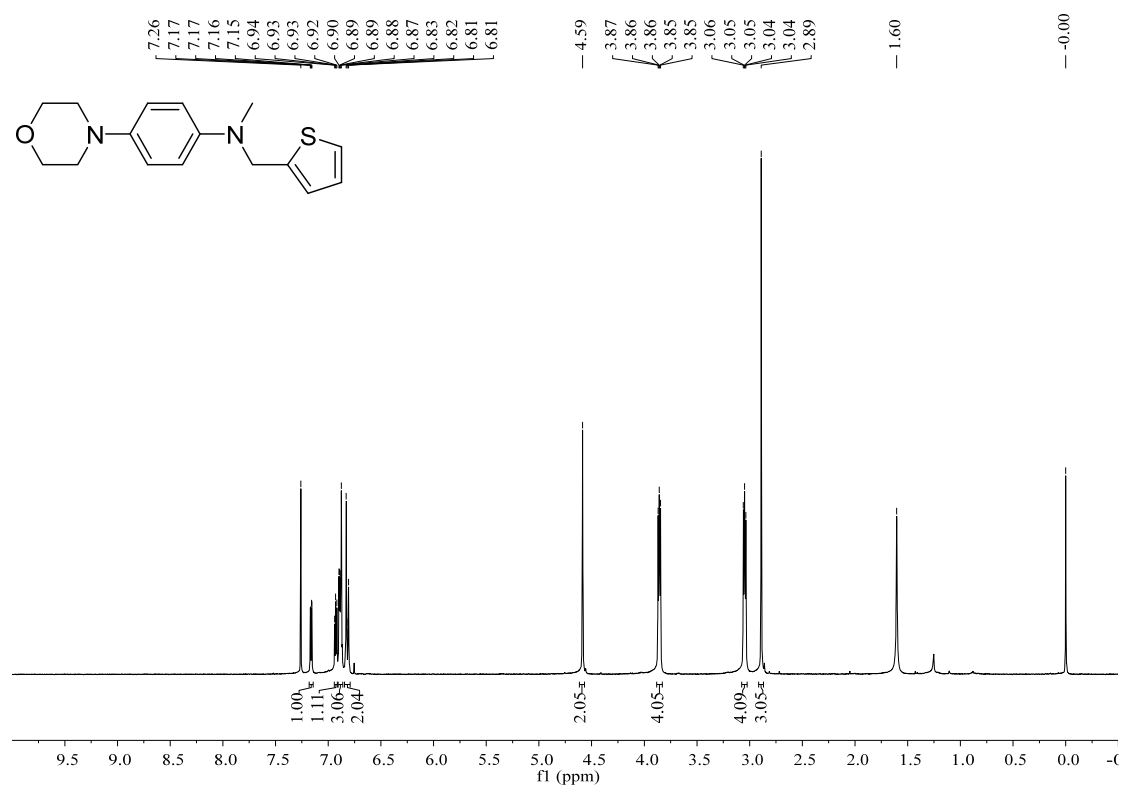

<sup>13</sup>C NMR spectra of **4g** (100 MHz, CDCl<sub>3</sub>)

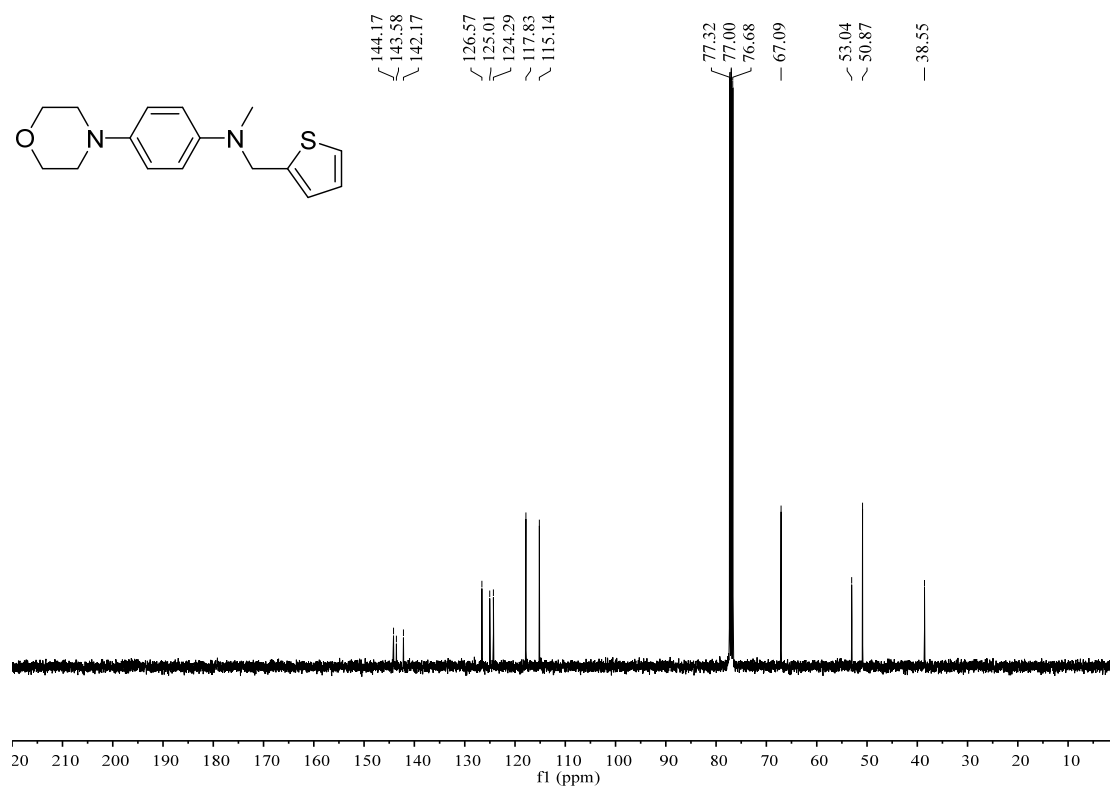

<sup>1</sup>H NMR spectra of **4h** (400 MHz, CDCl<sub>3</sub>)

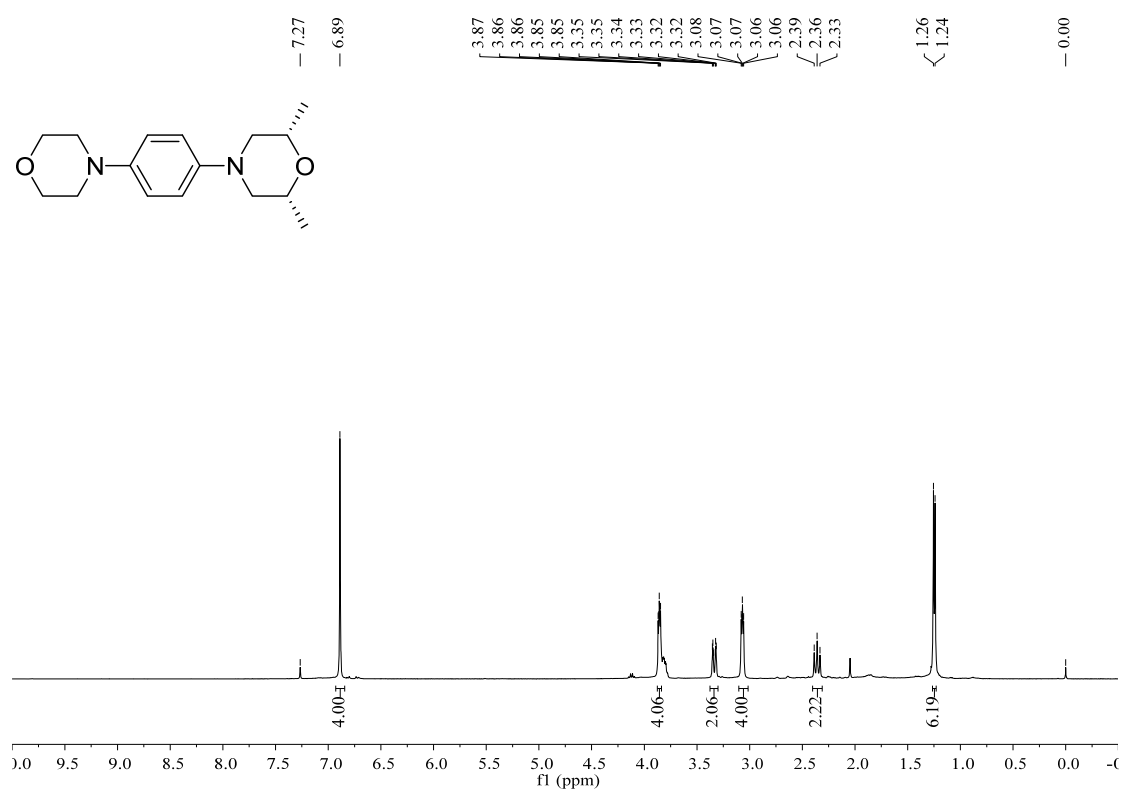

<sup>13</sup>C NMR spectra of **4h** (100 MHz, CDCl<sub>3</sub>)

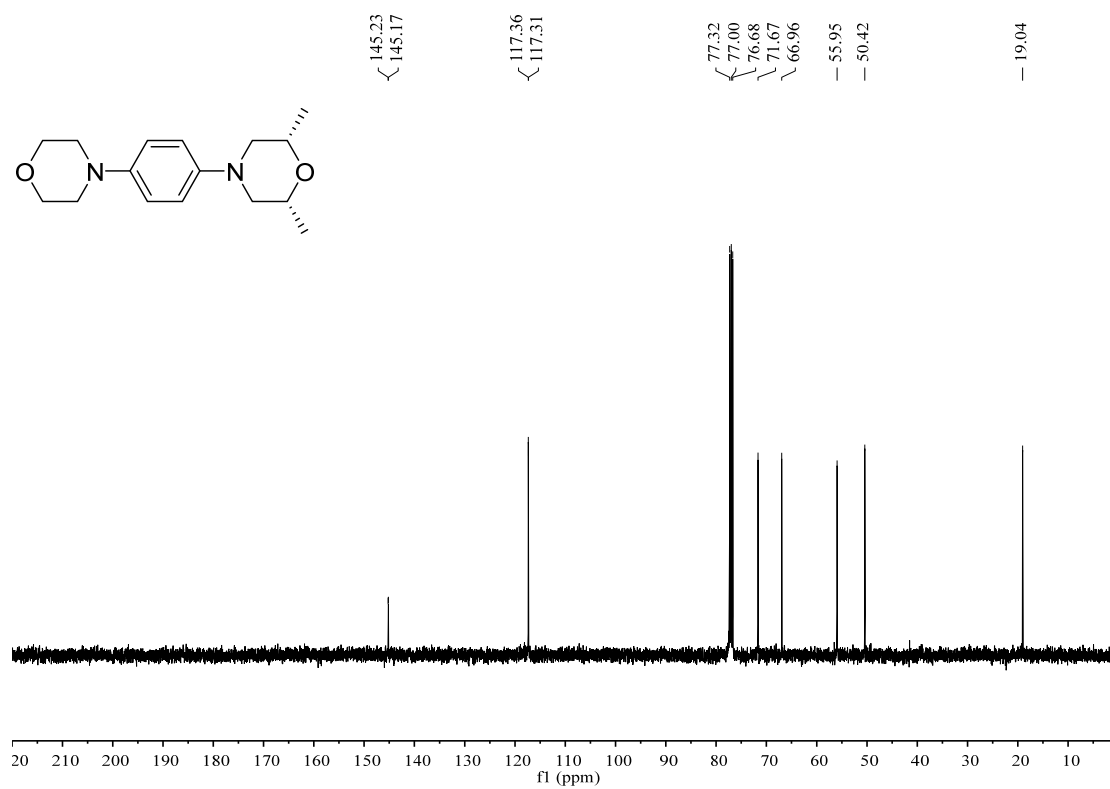



<sup>1</sup>H NMR spectra of **4i** (400 MHz, CDCl<sub>3</sub>)

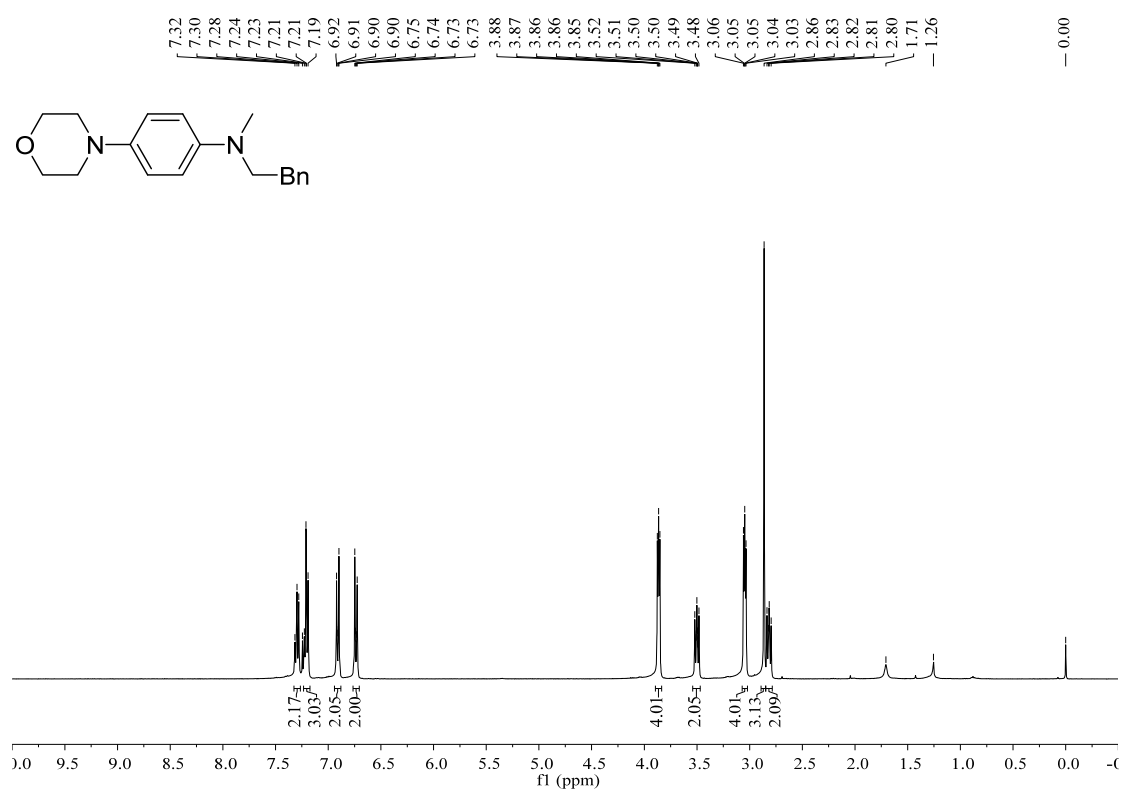

<sup>13</sup>C NMR spectra of **4i** (100 MHz, CDCl<sub>3</sub>)

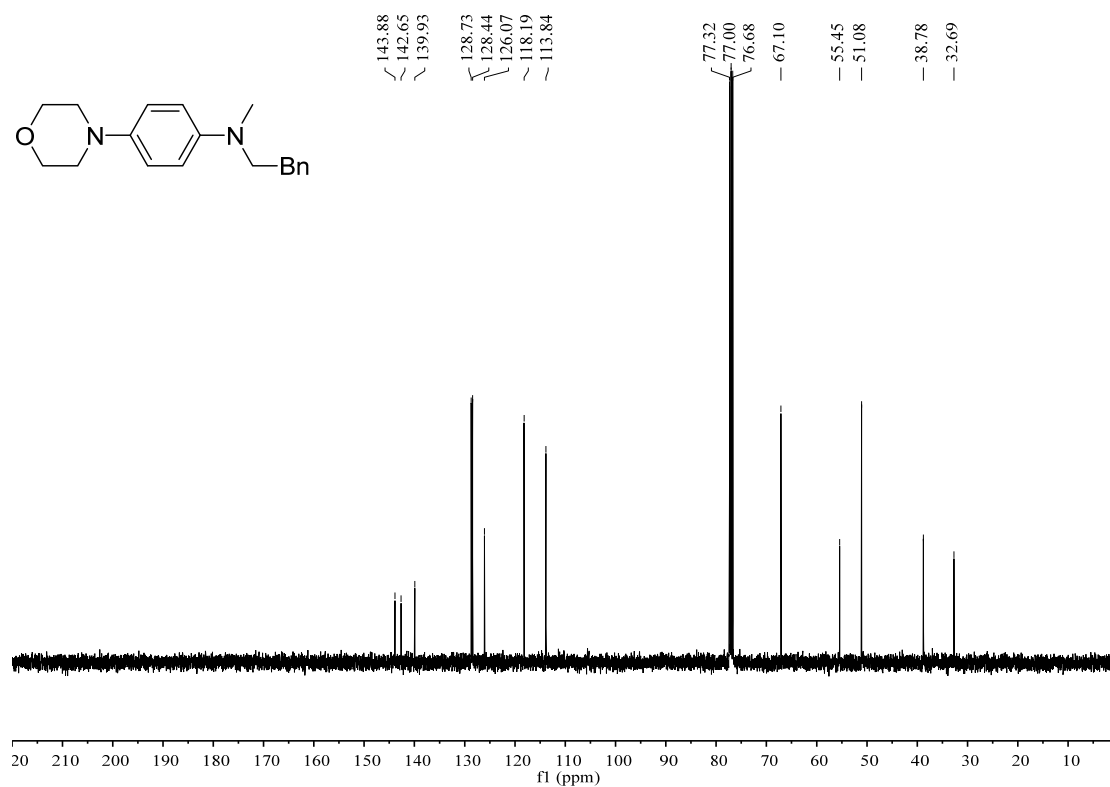

<sup>1</sup>H NMR spectra of **4j** (400 MHz, CDCl<sub>3</sub>)

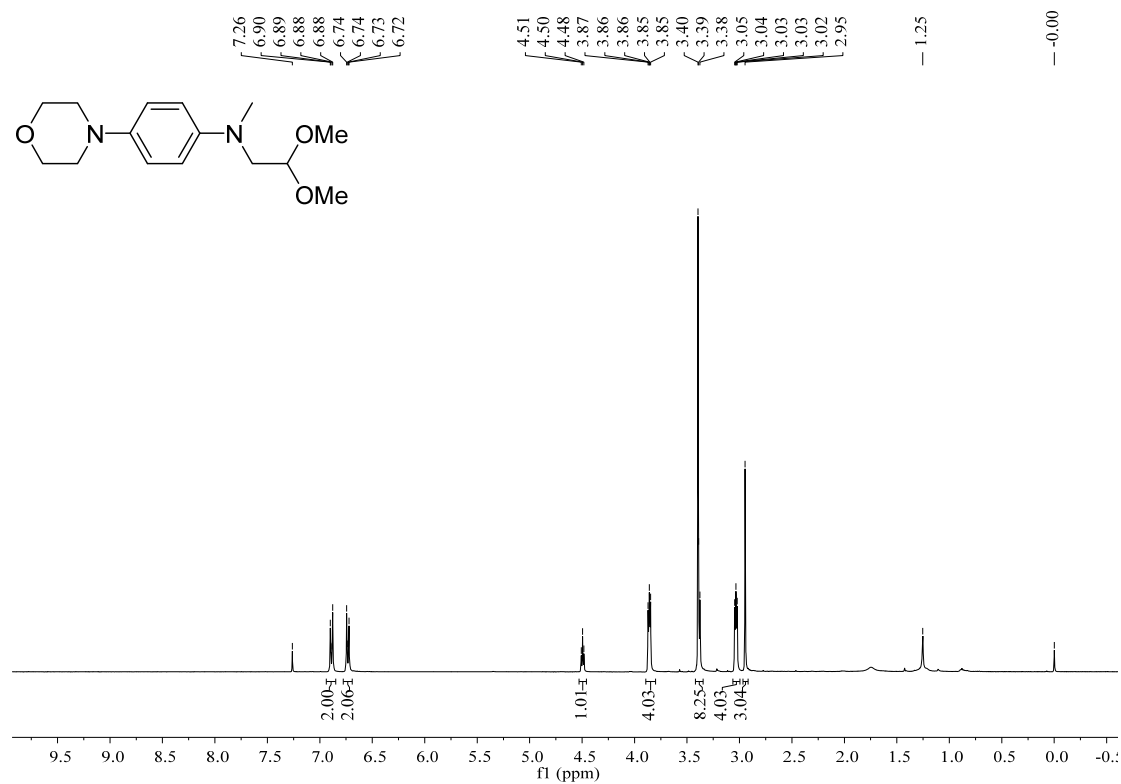

<sup>13</sup>C NMR spectra of **4j** (100 MHz, CDCl<sub>3</sub>)

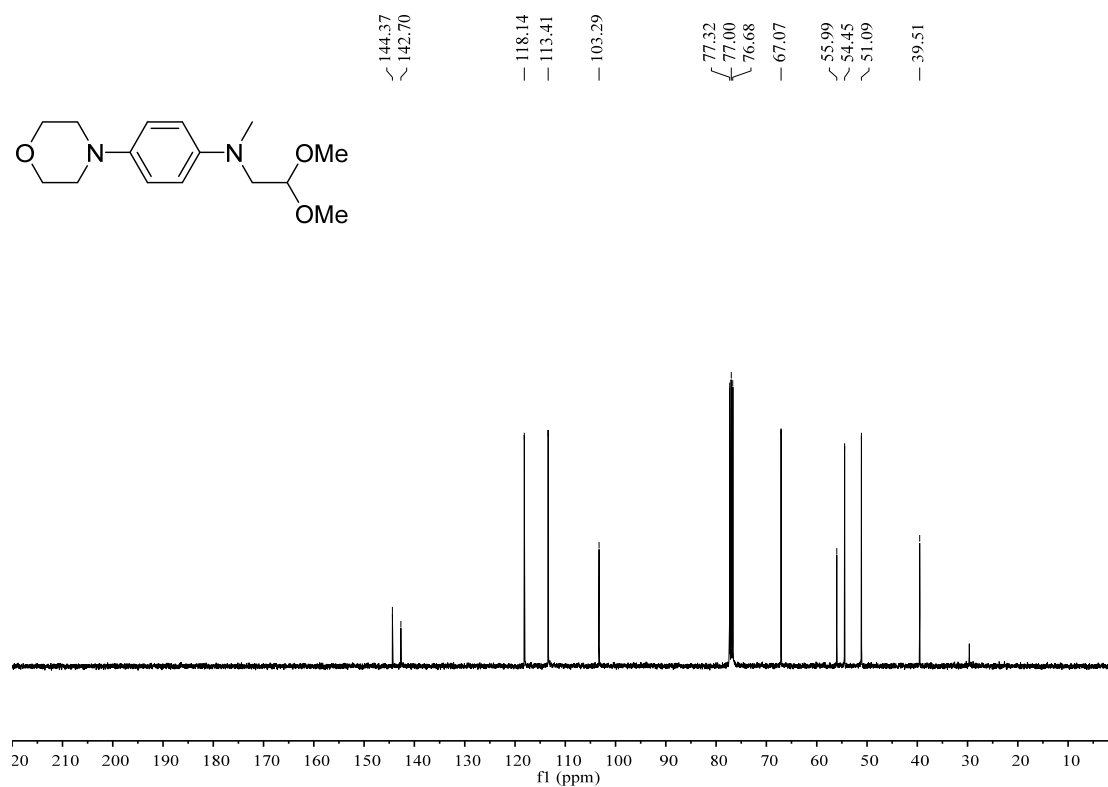

<sup>1</sup>H NMR spectra of **4k** (400 MHz, CDCl<sub>3</sub>)

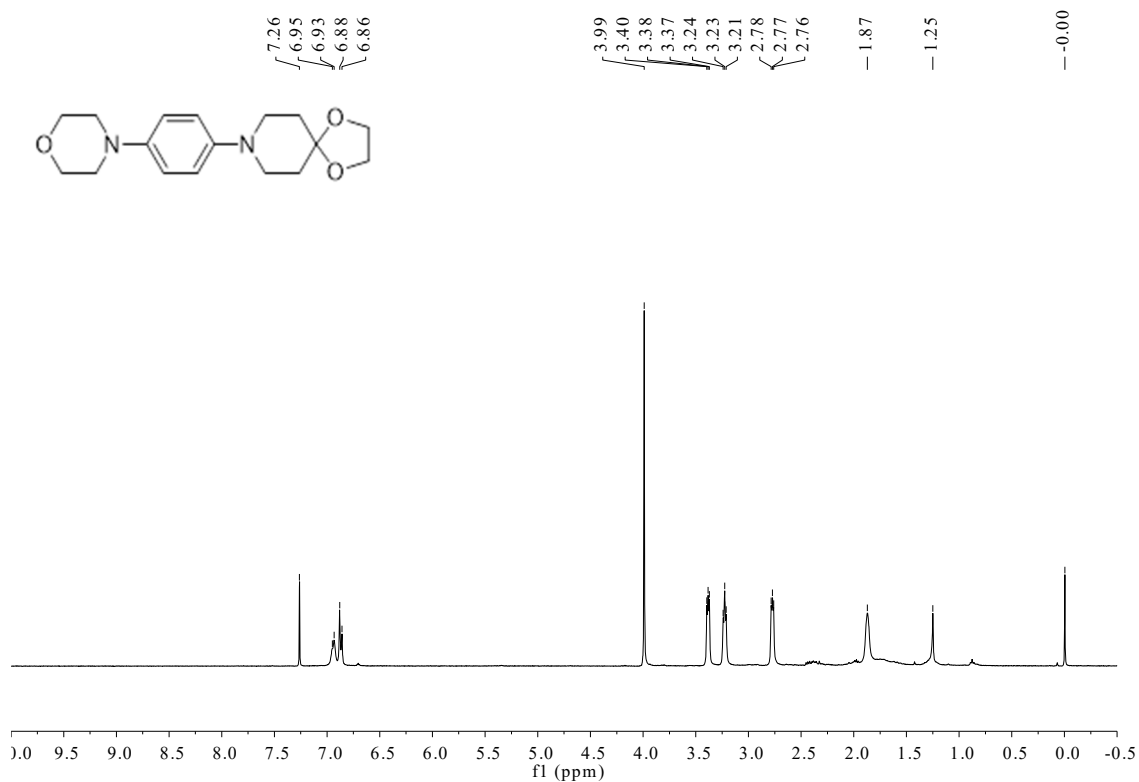

<sup>13</sup>C NMR spectra of **4k** (100 MHz, CDCl<sub>3</sub>)

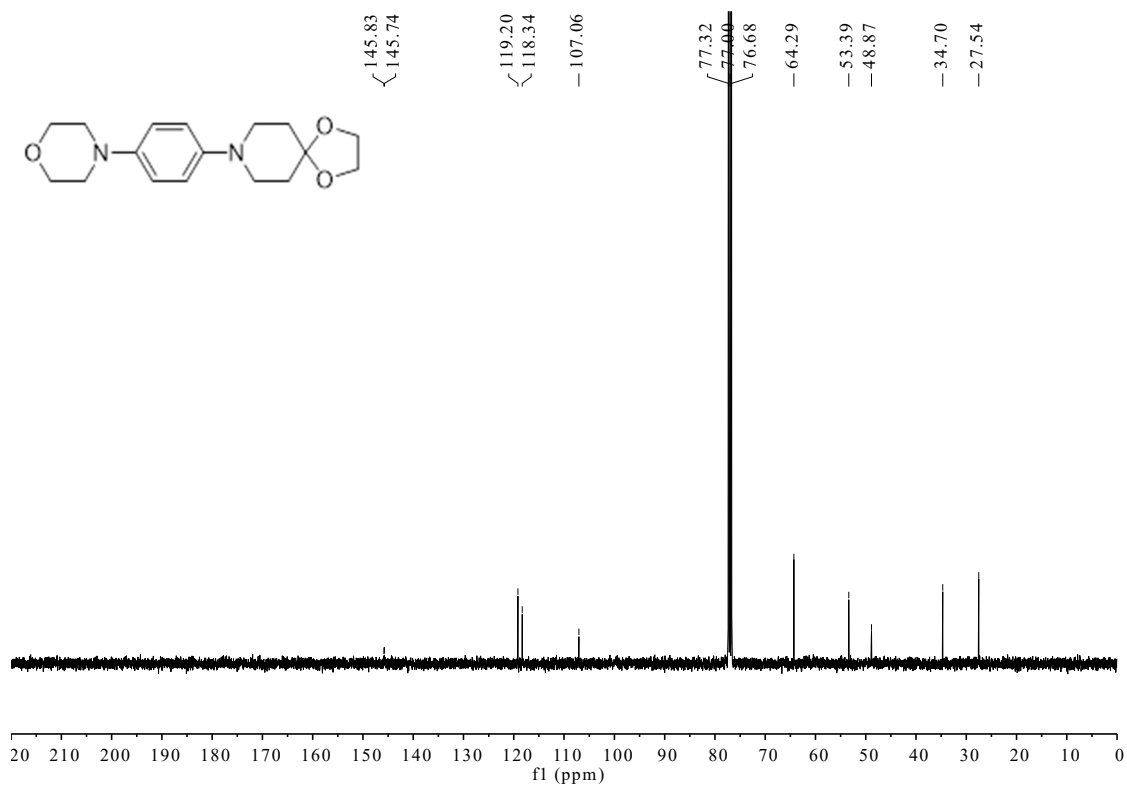

<sup>1</sup>H NMR spectra of **4l** (400 MHz, CDCl<sub>3</sub>)

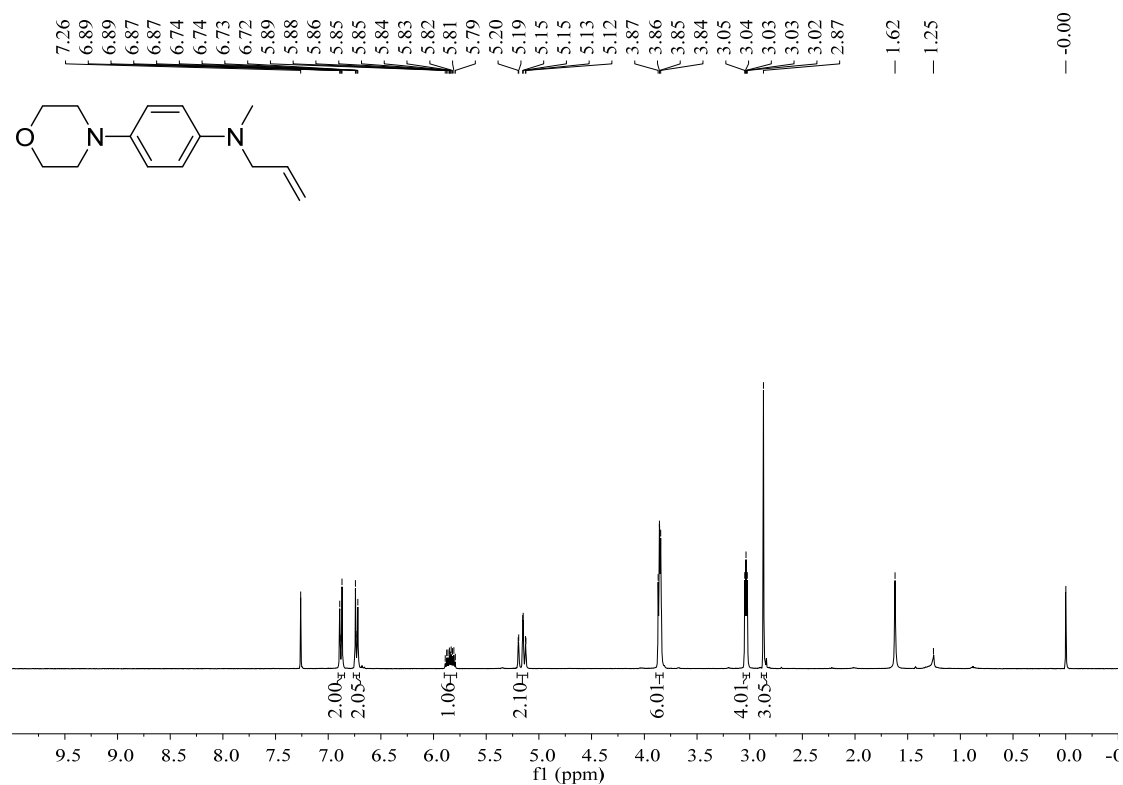

<sup>13</sup>C NMR spectra of **4l** (100 MHz, CDCl<sub>3</sub>)

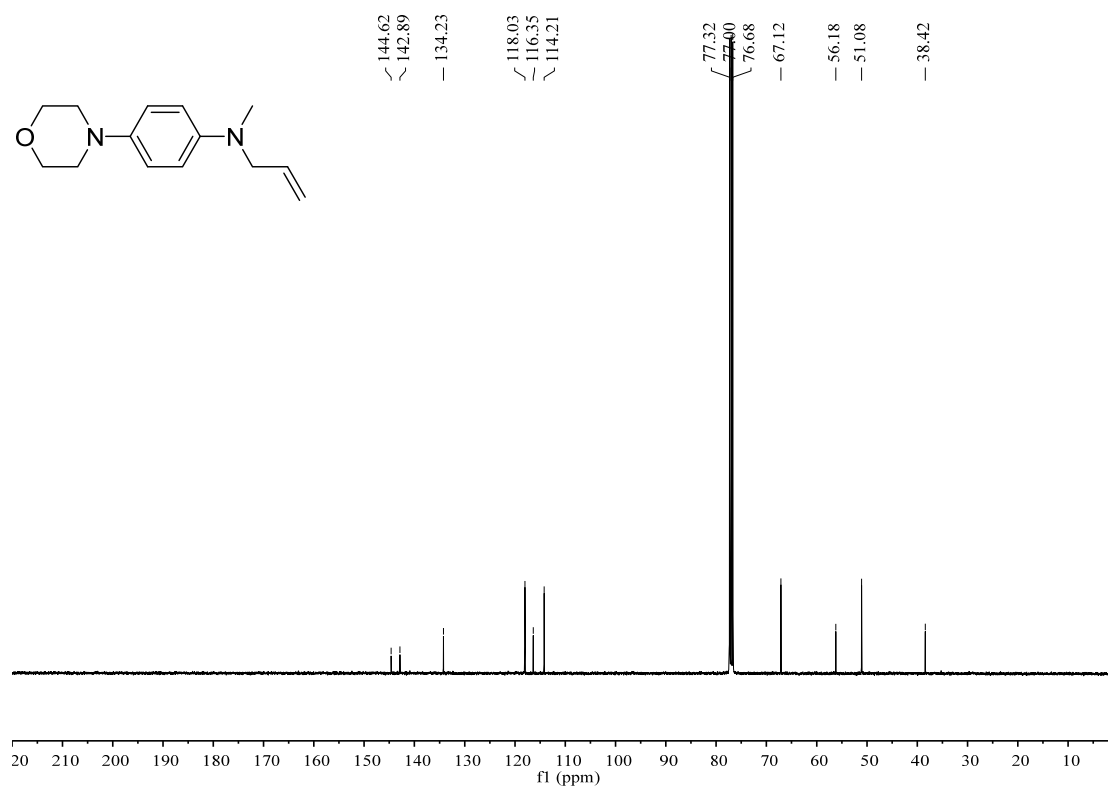

<sup>1</sup>H NMR spectra of **4m** (400 MHz, CDCl<sub>3</sub>)

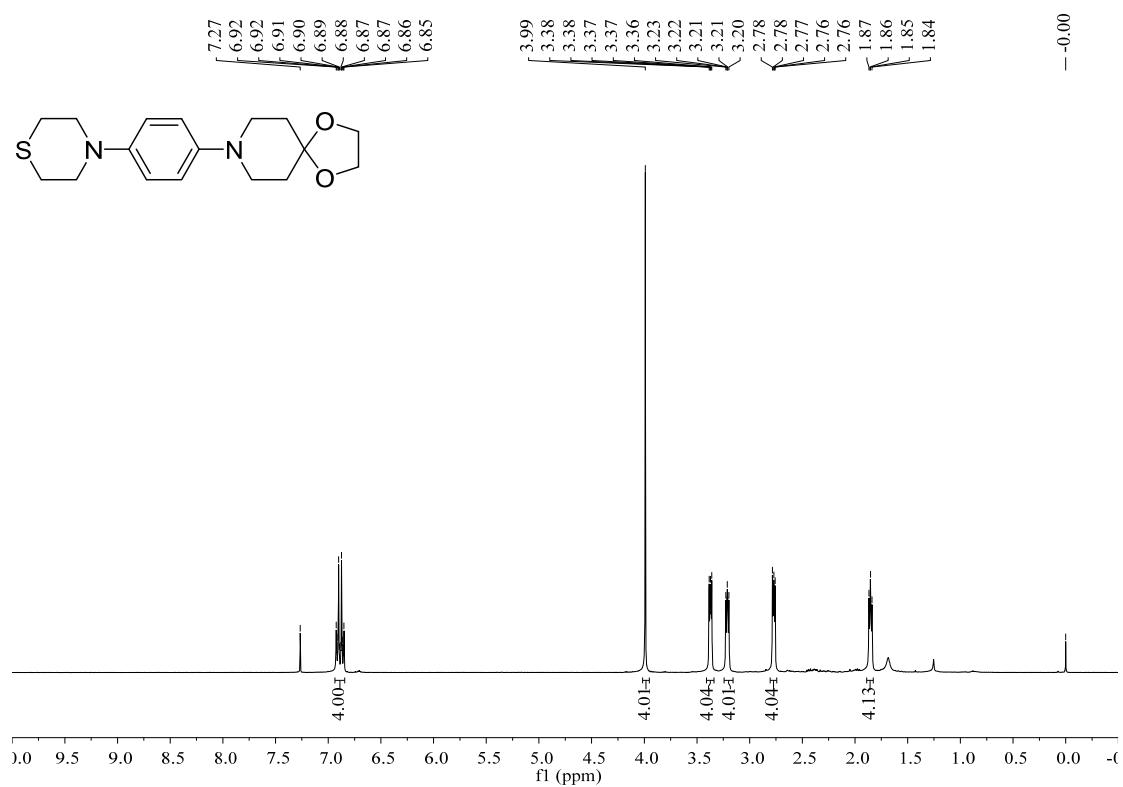

<sup>13</sup>C NMR spectra of **4m** (100 MHz, CDCl<sub>3</sub>)

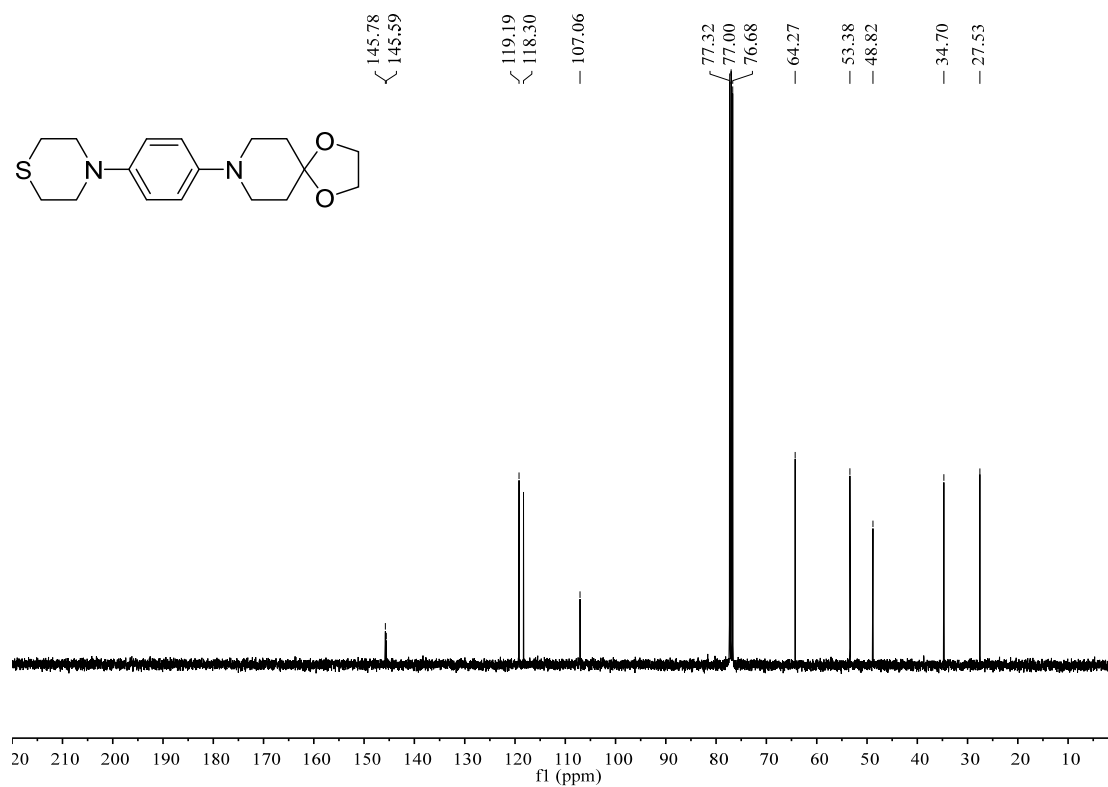

<sup>1</sup>H NMR spectra of **4n** (400 MHz, CDCl<sub>3</sub>)

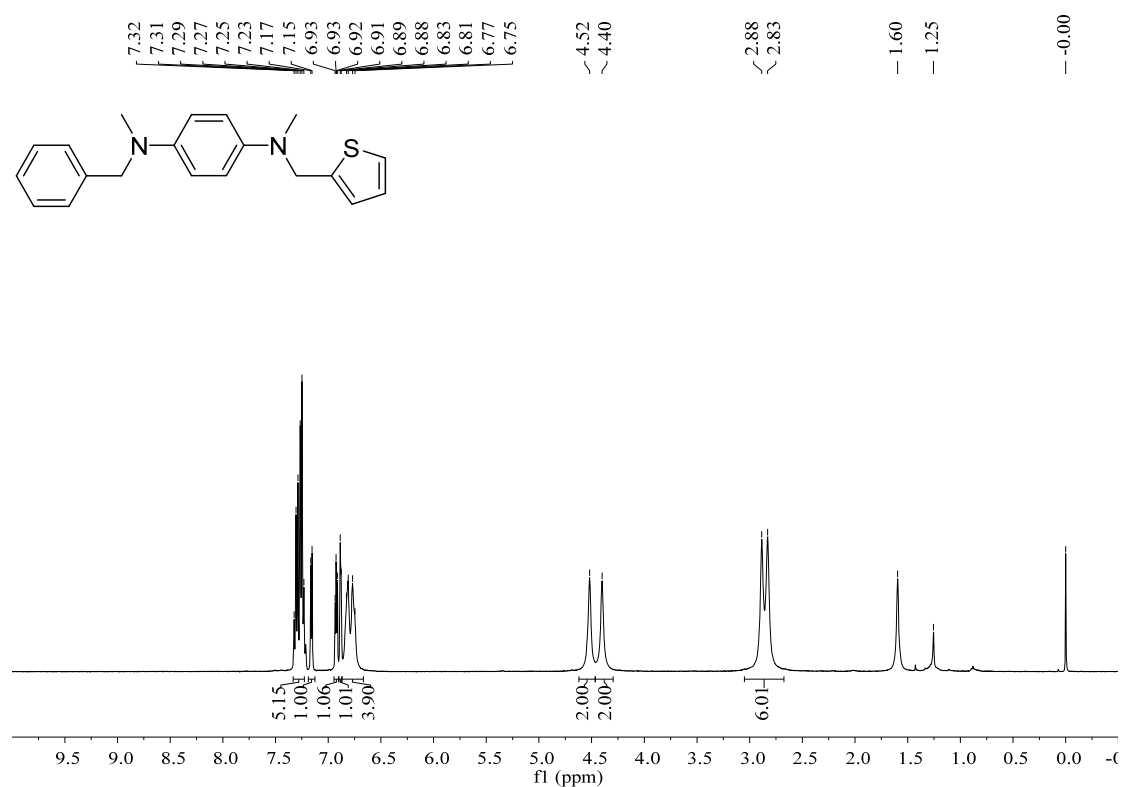

<sup>13</sup>C NMR spectra of **4n** (100 MHz, CDCl<sub>3</sub>)

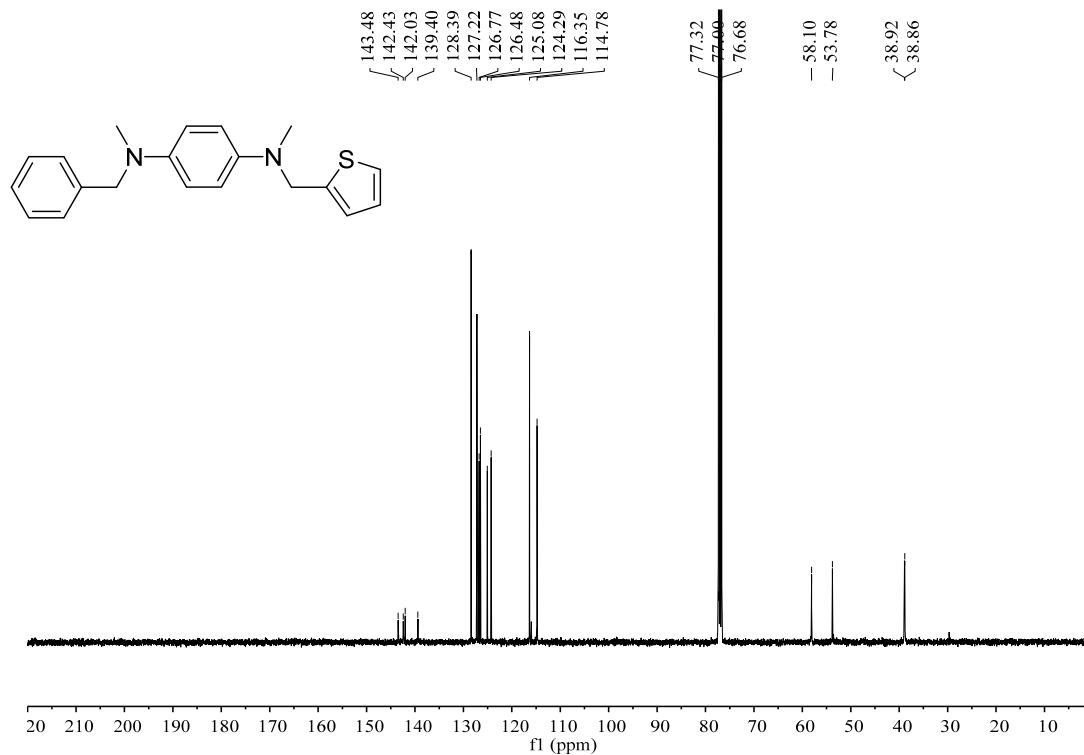

Supplement: d5gc05871f1.pdf [file d5gc05871f1.pdf]
